# Supplementary material for: Complete Genome Sequencing and Comparative Genome Characterization of Lactobacillus johnsonii ZLJ010, a Potential Probiotic With Health-Promoting Properties
Source: Front Genet. 2019 Sep 10;10:812. doi: 10.3389/fgene.2019.00812 (PMC6746964; doi:10.3389/fgene.2019.00812)
Supplement: Supplementary file 3 [file Table_3.xlsx]

## Sheet: Sheet1
TABLE S3 Unique genes of the ZLJ010 genome
Gene ID	Cluster ID	Strand	Start	End	Length (bp)	NR description	Gene name	GO ID	COG ID	COG type	KO ID	KO description	KEGG map ID	Nucleic acid sequence	Amino acid sequence
gene0082	Single	+	88386	88532	147	hypothetical protein	-	GO:0016020;GO:0044425	-	-	-	-	-	ATGCAACTTTCTAATCGCCAAATAAAAATTATTGCTAGGTTATTGACGATAGATAGCGTAATTACCACAAAAAAATTGGCTGACCAATTTAATGTCAGTATTAGAACTATCAAAAATGACTTGAACGTAATTCAAGAGTGGATGACTAATTACGGCGATTATTATCAGTCAAAACCACATGCAGGTATTTGGGTGAAGGGAAATATAGAAGACAAAGAATTTTTAAAGCATCAATTGCTTTGTAGTATTAATTACGACCATGTAAAAACACCACAAGAACGGGTAGAACAGATTATTTTGCTATTAACCGTTAACAGTGGGTTTATCACGACGCAACAAATTGAAAATAAACTTGCAATTGGCAAAAATACGGTAATTGCTGATCTGGATAAGGTAGAG…	MQLSNRQIKIIARLLTIDSVITTKKLADQFNVSIRTIKNDLNVIQEWMTNYGDYYQSKPH AGIWVKGNIEDKEFLKHQLLCSINYDHVKTPQERVEQIILLLTVNSGFITTQQIENKLAI GKNTVIADLDKVEQYLKEYQLYLERKNYYGYHIRGSELNIRSIMETILNRALSYYEIPIL MSKSWLKGIKSFHFKIVPEIQNALTTIIKQLERKEWKGQFDINDVLTMVIRMLICIVRLS INQPINSYKPLMVSEEDENIFPYRLFSSVNKLYDFTLLKDEYEYLLRGVNPKFDNHNILK LTRQVIEQVSSQTKQDFYKDNQLQVNLFSHLLTRLNNKYKFANEYNPFVVDLKKRNPALF EAVKKALRENISSNPTVINDSFVAFVTLHFLVS…
gene0130	Single	+	134117	134260	144	hypothetical protein	-	GO:0016020;GO:0044425	-	-	-	-	-	ATGATTTCGCCAACCATCCAAACGGAAATCAAAAAATTTTATATGGCTCAACCAGATTTTGGAAACTTACCCATGCAGGAATTAGATCGACTAAGTGAAGCTACGCGTTTTAAACGGGTGCACCGGGGACAATGGATTTTTGATCAGGGGGATGAGCTTAGTAACGTGTATTTCTTAAAGGAAGGTCACGTAAAAGTTACGGCAATGAATGCGGAGGGAGACTTAACATATTTATCATTTTTAACGCCACAGGCAATTTTTCCACTGAGGGGCATTCTTAATGGGGAAGAATACTGTTATAATTCAATTGCGATCACTGATTTAGAAGTGTACATAGTTCCGGTAACGGAAATCCGACGGGTGATTATTCATAACTACGCTTGTCTAGTTTCGTTTATC…	MISPTIQTEIKKFYMAQPDFGNLPMQELDRLSEATRFKRVHRGQWIFDQGDELSNVYFLK EGHVKVTAMNAEGDLTYLSFLTPQAIFPLRGILNGEEYCYNSIAITDLEVYIVPVTEIRR VIIHNYACLVSFIQRMERLVERTTSLIEQTTSSNATQRVCQVLSGLKAEYGQKRGTVRQI PFQILLKGLAVLSGTTTETVTTVVKQLQQQNKIRYNRKLISFI
gene0158	Single	+	172348	172518	171	hypothetical protein	-	-	-	-	-	-	-	ATGAAAAAAGATCAAGAGAAAAAGAAGACGCCAATCCTTGTTCAAATGGCGATTTTTGCGGCGATTTTATTCGTTTCGCAAATCATTTCTCAGCTATTTCCCGCAAACATTGTGGTTCCCACTCCGTTAATTGGTATGATTATTTTATATATTTTATTGGCGACCCACATTGTTAAACTCGAACAAGTTGAAAAATTTGGTGACTTTATGATTGGCTTAATTGCTTTCTTATTCGTTCCATCGGGAATTCAATTAGCCGGTAGTTTGGATTTAATGAAAAGGGAAGGGCTCCAGGATATTATCGTGGTGGTCATTTCGACAATTATTCTCCTGGTCGTAATTGCATACGTAGGAGCATTTTTCATTCGAATTCACCAAAAAATTACGGGTAAAAAGGGG…	MKKDQEKKKTPILVQMAIFAAILFVSQIISQLFPANIVVPTPLIGMIILYILLATHIVKL EQVEKFGDFMIGLIAFLFVPSGIQLAGSLDLMKREGLQDIIVVVISTIILLVVIAYVGAF FIRIHQKITGKKGDNE
gene0171	Single	-	184865	184746	120	hypothetical protein	-	GO:0016020;GO:0044425	-	-	-	-	-	ATGGAATGGTATTTTACAGAATTGCGTAAGCATAAAGAACCGTTTCAGTTCGATGAGACAATGGATTTGGAACAATCTTTAATCGAACGCTTTCCAGATGTAGTTTTAAAATGCTCACCAATCAATTTTAAAGGCACCGTGACAAACGGCCGGGATTCAGTTATGATTGATGCTGAGATCAGTTGTGATTTAACGGTTCCGTCGTCGCGTTCCTTAACACCTGTTCACTTAAAGCTTGACTTTTTTGTCAATGAAATTTACGTGGATAGTGCTAGTTTGATTGACACGTTCCCACAAGAAGAAGTGGTCATGTTAGTCAAGGATGACGTAATCGATGTCGATAAGTTGGTTGAAGACAACGTAGTTTTACAAGTTCCCATGCAGGTTTTAACCCCTGAT…	MEWYFTELRKHKEPFQFDETMDLEQSLIERFPDVVLKCSPINFKGTVTNGRDSVMIDAEI SCDLTVPSSRSLTPVHLKLDFFVNEIYVDSASLIDTFPQEEVVMLVKDDVIDVDKLVEDN VVLQVPMQVLTPDEEQKGTMPSGAEWQVVSEVAAESEQDKQVDPRLAKLKDLLKDNSDQ
gene0257	Single	-	267812	267636	177	hypothetical protein	-	GO:0003824;GO:0005488;GO:0009987;GO:0008152;GO:0044699	-	-	-	-	-	ATGGGATTAAAAATTATTGATTCGGCAAAGTATAGTCCTGAAAGGATTATTACTAACGACGAACTAGCCCAAACGTTAGATACGTCGGACGAATGGATTTCGAAACGAACCGGCATCAAGCGGCGACACCGAATTGGTGAAGAAACTAATGCTGCGATGGCAACTAGGGTCGCAGAAGCTTTATTAACCAAGACGAATACCGCTCCCGAAGAGGTGGACCTGATCGTGGTGGCGACCATGTCTCCGGATTACCAAACTCCTTCGGTGGCCGCACTAGTTCAAGGTGCACTTAAAGCTTCTAGAGCCATGGCCTTCGACATTAGTGCCGCGTGCAGCGGCTTTGTTTACGGAATGAGCGTGGTGAACCAAATGCTCCAGTCGCCGAATTATCATAAAGCT…	MGLKIIDSAKYSPERIITNDELAQTLDTSDEWISKRTGIKRRHRIGEETNAAMATRVAEA LLTKTNTAPEEVDLIVVATMSPDYQTPSVAALVQGALKASRAMAFDISAACSGFVYGMSV VNQMLQSPNYHKALLIGSEALSRLLDWQDRSTAVLFGDSAAGVLVENDPASSASLIAERL TTYGDLGEHLTAGNVAALTDSTQSYFFQMNGRKVYEFATNRVPESIQAVLQAAEIDAKDV KYFLLHQANARIIKSVAKRLELPIEKFPINIADYGNTAAASEPLLLAELMQEHKIQRGDI IVFSGFGGGLTIGTNVIKF
gene0340	Single	-	349800	349021	780	DDE transposase	-	-	COG3464	L	-	-	-	ATGAAAGAAATTAATTTTACGATTGAAGAATCTGCAAAGGGTCGTTTGGATAAGGTGATTGCGGAAAACGTCGCTGATCTAACCCGTTCTCAAGTACAAAGCTTGATTAAAAAAGGGCAGATTCTGGTAAACGACGCGCCTACTACCAATCGTTATCAAGTTAAACCGAACGATCAAGTTATAATTAAGCTACCAGATCCGGTAGCAATTGACGTTCAGCCCGAAAAAATGGATTTAGATATTGTCTATGAAGATGACGACGTGATTGTCGTTAATAAGCCCCAGGGTATGGTTGTCCATCCTGCTCCCGGGCACGATCATGGAACTTTGGTGAACGGACTATTGGCCCACACGCCTTTGGCAACGATTAATGGGGAGTTGCGCCCTGGAATTGTGCAT…	MKEINFTIEESAKGRLDKVIAENVADLTRSQVQSLIKKGQILVNDAPTTNRYQVKPNDQV IIKLPDPVAIDVQPEKMDLDIVYEDDDVIVVNKPQGMVVHPAPGHDHGTLVNGLLAHTPL ATINGELRPGIVHRIDKDTSGLLMVAKNDQALVSLSKQLKDKTNQRKYWAIVHGNIKEDT GTINAPIGRSKKDRKKMAINEEGRPAVTHFKVLERFGEYTLIECQLETGRTHQIRVHLKY IGHPVAGDPLYGPRKTLKGNGQFLHAKLLGFKHPRTGEEMVFEADPPAIFQTTLKKLRAI SD
gene0354	Single	+	360188	360778	591	YSIRK signal domain/LPXTG anchor domain surface protein	-	GO:0044464;GO:0005576;GO:0005623;GO:0016020;GO:0044425	ENOG410XR2M	S	-	-	-	ATGAGAAATGTAGGTAAGACCAATTTAAAACCCAATTACGAAAAATTTGCTAAGGCAAGTATTCGTGAGTTATTTAAAGACTTTAATATCACGACGACAGGCCTTAAGCAAGCCCAGGTTCAAAAAATGCGCAATCGATTTGGCCCTAATAAACTAACGGATAATGCGAAAAAATCAATTATCCGGACAATCTTAGGAGCCTACATTACGCCGTTTACGATTGTTTTGATTTGCATTGGCTTAGTGTCCTTTATTACCGACGTAGTTTTAGCTCCACCTGGGGAACGTAACTATCTGGGGAGCGGAATAATTTTTGGAATGGTAATTATAAGCGGAACAATGACCCTTATACAGTCGTTACGGTCTACAAAAGCCGTAGAACAATTAAAAACCATGATT…	MRNVGKTNLKPNYEKFAKASIRELFKDFNITTTGLKQAQVQKMRNRFGPNKLTDNAKKSI IRTILGAYITPFTIVLICIGLVSFITDVVLAPPGERNYLGSGIIFGMVIISGTMTLIQSL RSTKAVEQLKTMIKSVTTVKRANGIQKIPVDHVVCGDIVQLSVGDIVPADMRLIKSKDLL VSEASLTGESYPVEKNHLQSKKNVKSETDYENLVFMGSYVTNGQAEGVVIATGNQTLFGG IAHSASITPTETNFDLGIRKTSYLFIKFTVIMTTVIFLINGLTKGDWLEALLFGLSVAVG LTPEMLPMIVTTNLVKGATKMAKGGTIIKNLKAIQNLGAIDVLCTDKTGTLTQNQFSLNH YLNWKGTTDEETLKWAYLNSRYQTGFNNPLDQA…
gene0358	ORTHOMCL1984	+	372619	372795	177	hypothetical protein	-	-	-	-	-	-	-	ATGAGAAAAAAAATAACTAACCCAATTATCACGGGATTTAATCCTGACCCAGTGATTTTTCATGATGATGAGAAGTACTATATCGTAGTTTCGACTTTTGAATGGTTACCTGGAATTCGAGTATACTCTTCAACAAACCTCTATGAATGGCATTACGAAACTTCAATATTAACTGATTCAACGCTTATTAATTTAAGAGGAAATCCCCGAGGCGGCTCAATTTGGGGGCCATTTGCTACCTATCACAACGGTAAATATTACGTAGTTTATACAAATACTAACTCTACCACCGTTCCATACAAGGATGTAGATAACTATATTATTTGGGCAGATAATATCCATGGTCCGTGGAGTCAGCCTACGTACATTAACAGTTCAGGTTTTGACCCTTCTATTTTC…	MRKKITNPIITGFNPDPVIFHDDEKYYIVVSTFEWLPGIRVYSSTNLYEWHYETSILTDS TLINLRGNPRGGSIWGPFATYHNGKYYVVYTNTNSTTVPYKDVDNYIIWADNIHGPWSQP TYINSSGFDPSIFFDTDGKAYFLNEIWDYRIPSRNKSCGIVMQEIDPISFCLLGRPKLIF KGTEAKKTEAPQIYKHGNFYYLLVAEGGTEQNHQETVARSKNVWGPYEVDPQTPLITAKD SKESVLQSTGHSSLVPSKNGDWYITYLCTRPLYADKAILGRETALQQVNWTDDGWLRLSN GSHRPDLYLPNHLEIDPAFRRSHSFTDPLNNGITPKYWNTLRQFLNSSWAVSDSTGLTIK GGQSPQSNFDQHLIATRQCDFKATVSVEMDYTP…
gene0364	Single	+	385316	386671	1356	transposase ORF_C	-	-	COG3436	L	-	-	-	ATGGAAATCTACGAACAGCATTTACAATTTAGCAGTCAATTGGAAAATAAAATATGGGATGACCTGCTTAACCGGCAGCGTTATTTAGCGTTAAAGGTAATTGCTGATGACGCTGCGAAGTTAAGGTTGTTAGCCAAACTATTAGACCAGATGGATTTAATTCATACAGTGGAGGGGCTAAGAGTAGACCTACTTTTACCACGGGTTAACTTAGCCCTTTTTAAGGAAAAATTGACGGAAATTTTTAATGACCCGAGTTTAGACCAACAAATGAACGATCTAAATCAAAAGTACCGGGTGCTGTGGCAAGCTGGTCGCTTTGAATTTAACCTTACTGAACGTCCCGTAATCTATGGGATCTTAAATGTTACTCCCGATTCTTTTTACGATGGCGGCTGG…	MEIYEQHLQFSSQLENKIWDDLLNRQRYLALKVIADDAAKLRLLAKLLDQMDLIHTVEGL RVDLLLPRVNLALFKEKLTEIFNDPSLDQQMNDLNQKYRVLWQAGRFEFNLTERPVIYGI LNVTPDSFYDGGWYQSETAILKRVSEMVDAGVDVIEVGGQTTRPGFVEIPPEEELKRVTQ VLDLIQKNFSQVAVAIDTYKYAVMERVIDYIDIINDVNAFTDDQRKLALMRNSNVGLLTM HSARNKDYDNLTAEMKAFFEENIATLVQNGININRIALDQGIGYAKKADGYQDYAMMKNI DQFNYLNRPMMIAISRKGFGAKLFGLPKEDRLPVTLVAEAYMYLHGGRILRVHDIAETVQ LAKMLDVIQNGYWFGS
gene0366	Single	-	388442	388014	429	glutamate:gamma-aminobutyrate antiporter	gadC	GO:0005215;GO:0016020;GO:0044425;GO:0051179;GO:0044699	COG0531	E	K20265	glutamate:GABA antiporter	ko02024	ATGCCTAAAACAACTTACGAAGAATTAATTCGAAAATTAAACCATAACATGCTGGTTAGTCACCAAGATCGCATTCCATTACTAAAAACAGTCCTCGCAGCCTTAGGACATCCCGATTTAAATTATCGAATCATCCACTTAGCGGGGACCAACGGGAAAGGTTCTACAGGCGCCATGCTTGCAAAAAGTCTCGAAAACGCGGGCTACCGGGTGGGCCATTTTTCCAGTCCGGCAATGATTGACCAGCGCGAACAAATTCAAATTAACGGCTCGATGATTGAAAAAGAAGCTTTTGTGGCTTTATACGAAAAAATCACGCAAGAACTTCCCCAAACTATCACACCGGCAAGTATTTCAATCTTTGAATGGTTTACATTGATTATGTTGGAATATTTTGCT…	MPKTTYEELIRKLNHNMLVSHQDRIPLLKTVLAALGHPDLNYRIIHLAGTNGKGSTGAML AKSLENAGYRVGHFSSPAMIDQREQIQINGSMIEKEAFVALYEKITQELPQTITPASISI FEWFTLIMLEYFAENDVEWAIIEAGLGGENDATNIIEHPAAVVFTHIDYDHVQILGDTLE QIAQNKAGIIKKDATVFIAPKQTQQVRTILEKKAVQKRATSVIQAVPGTIQVIKRSITGF KVSLHAKTTNIAATTFKLLGDYQIDNLTTVVTVYEWLFNQQVINDWQPLIEMMQHIQIPG RFQVLQRDPLVILDGAHNVDGTQALLKGLSNLNANHKLFFILGFLKDKDYSGMLHLYAKA ADRIFAVQPDNPSRALRPTTIQTMLDNKVVGSY…
gene0434	Single	-	457986	457849	138	hypothetical protein	-	GO:0003824;GO:0005488	COG0488	S	K06158	ATP-binding cassette, subfamily F, member 3	-	ATGCACCATCTTAAACCAATTAAACAAAGCCCAAAACTGTATTTTCTTAGCTTTATTCTGGTTTACGTATCCTGCATTTTACTAGCGCTAACTTTTCCCCATGCCGTAGCTGCGAACACAAAAGCAAATAACCGGGTAACCTTTGATGCGGAGGCAATTTTACCGAAGAATCAGCAATCTGATGCCAGTTATTACGATTTGCGGGTGCACCCGGGAAATAATGAGCGACTATTTATTAGGTTGCGCAATCTCACTAACGAAAAGCAAACCGTTATTATTAAAACAAATAACGCGGTTACTAACCGGAATGGCGCGATTGATTATTCCAAGTCCAAGACTAAGTTACTAGGGGGTCCGACTTTCAAACAAATGATTTCGGGACCGCAGACCGTTACGCTG…	MHHLKPIKQSPKLYFLSFILVYVSCILLALTFPHAVAANTKANNRVTFDAEAILPKNQQS DASYYDLRVHPGNNERLFIRLRNLTNEKQTVIIKTNNAVTNRNGAIDYSKSKTKLLGGPT FKQMISGPQTVTLNPKEVRKVDYHLKIPSKGFEGTVLGGFYCYAKSPKRTTKQQSLSLIN NFAYTIGAKLRCSNSQVRPKLSLEKVTPGLDNGYLTVFATLQNSTPTLLSKLHMRATVTQ KGHRKVLKETNQQISIAPRVRFRLPISWDNQPLKSGKYVLTIVLKSAAGKKWQFSKEFTI TGADTKLNQKAVEVKKPINNRLIYLIIGLLIGVILLLSGYIYRMKRKNSKTEK
gene0445	Single	-	468890	468738	153	hypothetical protein	-	-	-	-	-	-	-	ATGAAAAAATTTATTAATCGACACCCGTACCTTACCGTGGTTGGGTCGGTAATTTTAGGGAGTGTTATTACCTTGGCGGGGGTGATGACTTTTCTACTGGGTTTCACTAATTCATCAGCAGACCGCCAAACCAATTTAAATCGAATTGCGAGCGTTTATAATCAAATTGATGCTAATTATTACCGGAACGTTGATTCTAACAAGTTAGCTACCGGGGCAATTAACGGGATGTTGGCAACCTTAGACGATCCGTTTTCAAACTACCTTACCGATAGCGACGCTTCCTCCTTAAATGATAGCGTGGCGGGATCGTTTGGCGGAATTGGGATCCAAGTAATTAAGAAGAATGGGCATATCGAAATCATGTCCACGATTGACGGGACCCCCGCACAGAAAGCG…	MKKFINRHPYLTVVGSVILGSVITLAGVMTFLLGFTNSSADRQTNLNRIASVYNQIDANY YRNVDSNKLATGAINGMLATLDDPFSNYLTDSDASSLNDSVAGSFGGIGIQVIKKNGHIE IMSTIDGTPAQKAKLKAGDQIIKVNGKSVASQSLSKTMSIMRGKVGTTVELELQRGDTTF TKKLKRAKIPVETVTGKLLKNKVGYITISSVAEKTASELKKNLKKLDHQGAKSYIIDVRN NPGGLMQQALKMSSMFLKDGQPIMQVKTRSGKPEVYKASHKLDGGYKVKKPAVVIINGES ASAAEIFAAALHQSAGIPLVGAQSYGKGTVQNITQYTDNDELKLTIAKWLTPDGTWINKK GLTPDYKADYPEMAYITTFNHHKTYQVGQSGTD…
gene0488	ORTHOMCL1521	-	514128	513829	300	hypothetical protein	-	-	ENOG410Y13W	S	-	-	-	GTGTCTGAAGAGTTGTTCGAAAAGAATCTCATATTATCAGATCCAAATTTAGAAATGTCACTGCTTGGTAATCAGGAACGCTTCGTGCCGATTATTGAGGAAGGGATGAACGTCAAGGTACTTCCGTTTGGCGAACGAATTACCGTAAAGGGCGCACAAACTGACGTAGAACAAACCATTGCAATTTTGAAAACGCTGGTTCAAGTTTTAAAAACCGGGGTGCAACTTAGCAGCACCGATTTCGTTAGTGCCATGAAGATGGCTGAAAAGGGAACCTTAAACTACCTGCCCGAGCTTTATTCAACGGTCTTGATTAAGGATGCGAAGGGTAAACCAGTTCGGATTAAGAACTTTGGACAGCGGCAGTACGTGGAATCAGTCAAGAATAACGACGTGACG…	MSEELFEKNLILSDPNLEMSLLGNQERFVPIIEEGMNVKVLPFGERITVKGAQTDVEQTI AILKTLVQVLKTGVQLSSTDFVSAMKMAEKGTLNYLPELYSTVLIKDAKGKPVRIKNFGQ RQYVESVKNNDVTFGIGPAGTGKTYLAVVMAVAALKRGDVERIILTRPAVEAGESLGFLP GDLKEKVDPYLRPVYDALYQIIGAEHTTRLLDRGVIEIAPLAYMRGRTLDNAFVILDEAQ NTTNQQMKMFLTRLGFGSKMIVNGDVTQIDLPRGTRSGLKEAQIVLSNVNKVAFVNFTAN DVIRHPVVAKIVKAYDEKEAKG
gene0489	ORTHOMCL1522	+	514697	515083	387	hypothetical protein	-	-	ENOG4111UA7	S	-	-	-	ATGGATTTTACAAAGCAAATTAACGACGACTTAAAAACTGCCATGAAGGCCCATGATAAATTAAGCTTAAGCGTAATTCGGATGATCAAGTCCGAACTCTTAAACGAACAAGGTCGGGTTGGTCACGAATTAACCGAAGATGATTTTGCCACGGTAATTAACCGCGCTTATAAGCAACGGAAAGATTCAATTGCCGAGTTCAAAAAGGGTAACCGCGATGACTTGGTAAAAGAAACTGAAGCTGAATTAAAGGTTGTTGAAAAGTACATGCCTAAACAACTAAGCGATGACGAATTGCAAGAAATCATTAACCAAGTAATTGAAGAGACTGGGGCAACTTCGAAGGCAGACTTTGGAAAAGTAATGTCGACATTGATGCCTAAAGTAAAGGGTAAGGCA…	MDFTKQINDDLKTAMKAHDKLSLSVIRMIKSELLNEQGRVGHELTEDDFATVINRAYKQR KDSIAEFKKGNRDDLVKETEAELKVVEKYMPKQLSDDELQEIINQVIEETGATSKADFGK VMSTLMPKVKGKADGAKVNEIVKNTLG
gene0490	ORTHOMCL1523	-	515759	515241	519	hypothetical protein	-	-	-	-	-	-	-	ATGACAGAAAACAAACAAATTACTAACGTTTTTATCATTTCCGATTCCGTCGGAGATACTGGTGATCAAGTAGCCCGCGCCGCCGCTGCCCAATTTTTAGAGGCCCACTTGCGTTTTTCTCGCTACCCCTTCACCCAGACCATTTCTTTACTAGATAGCATTTTAAAAAAAGCTGAACGGGAAAAGGCAATGATTTTTTCTACATTTGTTGATCCAAAGCTTAACCAACGCACTAAAGCTTTTTGCCAAGAAAAAAATTTGAAATATTTTGACGTTCTGACCCCCGCCATCCAGCTTTTTGCCGAGGAGACCGGCCTAACTTCTTCCAATACTCCAGGAAGACGCCACTCCCTTAATGAAAACTATTTCGATAAGATCTCAGCAATGGAATTTGCGGTA…	MTENKQITNVFIISDSVGDTGDQVARAAAAQFLEAHLRFSRYPFTQTISLLDSILKKAER EKAMIFSTFVDPKLNQRTKAFCQEKNLKYFDVLTPAIQLFAEETGLTSSNTPGRRHSLNE NYFDKISAMEFAVTYDDGKDPTGFLKADIVLLGVSRTSKTPLSLYLANKGYKVANLPLVP KTQIPEEIWQVDRDKIFGLTTTKEVLNGIRRQRMISYGLNPDSSYADMDSINKELQFADD LFKKIGCLVINTANKSIEETATIIMESLA
gene0492	ORTHOMCL1524	-	516891	516586	306	hypothetical protein	-	-	ENOG410XUN0	S	-	-	-	TTGATTATTGGATCACACGTCAGCATGAGTGGTAAAAAAATGTTTCTGGGTTCCGTGGAAACCAGCATTGCTAACGGCGCCAACGCCTTGATGATTTATACCGGGGCTCCTCAGAATACCCGGCGTAAGCCAATTACAGAATTAAAAATTGAGGAAGGCCAAGCACTTTTTAAACAACATAACTTTCAGGCAACGGTTATTCACGCGCCATATATCGTTAACCTTGGAAATACGTTAAAACCCGCGAATTTTAAATTTGCGGTTAACTTTTTACGAGAAGAAGTGCAACGAGCAGACGCGTTGGGAGCTAGTCAATTGGTACTCCATCCAGGCGCCCACGTAGGTGCGGGAGCAGACGCGGCAATTTCTTCAATTATTGAAGGGCTCAATCAGATCATC…	MIIGSHVSMSGKKMFLGSVETSIANGANALMIYTGAPQNTRRKPITELKIEEGQALFKQH NFQATVIHAPYIVNLGNTLKPANFKFAVNFLREEVQRADALGASQLVLHPGAHVGAGADA AISSIIEGLNQIITPEQQVQIALETMAGKGTEVATNFEQIRQIIDGVTHNDKLSVCFDTC HTNDAGYDVKNHFDDVMAEFDQVIGLDRIGVIHLNDSKNGLGSHKDRHANLGFGTIGFEA LYRIAHDERLAKIPKILETPQVKDADGKKHAPYRLEIQMLKSGDFDPDLLTKVLQE
gene0493	ORTHOMCL1525	-	517513	517214	300	Lipoprotein	-	GO:0003824	ENOG4111P6Q	S	-	-	-	ATGCGTAAGCTCAAACAAGTACTTAAAATTATAATTCGATACGGTTTAATACTGATTAATGATGCGTTGATCCAGTTGCCGGTTCATAAGGGTCGCGTTTTATTTGAAAGTTTTAATGGTAAGGGGCTGACGGATAATCCTAAGGCCATTTATGATGAATTACTTAAGGAGTTTCCGGAAAACCGTTCCCAGTTAGTTTGGGGCGTTAAGGGTGAATTTTACCAAGCAATGACTACTCGATTTCCGGAAGCTAAAATCGTTAAACGCTGGTCGTTAACTTGGATTTGGACTTCGGCAACCGCTGAATATTGGATTTTTAATTCGCGGATGCCAACCTGGTGGAAAAAGAACCGTCGGACCACCTACGTGCAGACTTGGCATGGAACCCCGTTAAAGCAC…	MRKLKQVLKIIIRYGLILINDALIQLPVHKGRVLFESFNGKGLTDNPKAIYDELLKEFPE NRSQLVWGVKGEFYQAMTTRFPEAKIVKRWSLTWIWTSATAEYWIFNSRMPTWWKKNRRT TYVQTWHGTPLKHLALDMDQVKFPGNSRERYLAEFVKEADRWNYLVAANQYSADIFERAF SFHHQFLKTGYPRNDVLFQKNNVAAIAKLKQKIIGKSDCRVVTYAPTWREDDFIKVGHYH FRWHFDLGEMLRVLPDDVVLLIRPHYLVTDRIDISCYEDRVVVDSTSDMNEIYLVTDLLI TDYSSVMFDFANLRRPMLFFAYDLDYYRDDLRGFYFDYYHELPGPIATTAADLLREVHQL AQNDFAILDQSRFNQFAKRFVQWEQGDAAQQII…
gene0494	ORTHOMCL1526	-	518104	517787	318	hypothetical protein	-	-	ENOG4111PC4	S	-	-	-	TTGAAGAAGTTATATTTGCTGCTAGTTCGACTAGTTGATTGGTTTTTGCGCCGACGTCCCACGCACTTTAAAATTGCGTATTTTATGAGTTTTACGGGGAACGCCAAGTTTATTAAACAATTAGCCAGCCATTTTGGTACTGACGCGGTGCTGCTGGTTTATGAACCGGCTGTAAAAGCGGAGGTCCAACGCTTAAAAAGCGCGGGAGTGGTGCGCCACACGCTTGAGTTCCGCAAATTTCAAATAACCAGTTTTGTTAGGGGAATCCGGGCTGCCCGGGTTGCCCTATTTGATAATTATTATCCTGAATTAAGTGCGATTGCTAAATTGAAGGAACAATTTTTTATCCAAATCTGGCACGCTAATGGGGCAATTAAGGCTTTTGGCTGGGAAGACCCC…	MKKLYLLLVRLVDWFLRRRPTHFKIAYFMSFTGNAKFIKQLASHFGTDAVLLVYEPAVKA EVQRLKSAGVVRHTLEFRKFQITSFVRGIRAARVALFDNYYPELSAIAKLKEQFFIQIWH ANGAIKAFGWEDPSTYHRSVADQQRFQQVYNSFDEIVVGSAKMAEVFEQSWKVSSAKLAQ IGYPRSDQYFNEAWVQKARAKVFQDYPQFKKQRVLLYAPTYRKDVTFELPKDWSHLLVPE DAVLVVRLHPHLSELEQQLVANSPDRVVTVDHHVTTQELLCVADTLITDYSSIAFDFSLL DNANAVIFFTYDLAQFEQTVGIQASFKQMFFDELVENVAELNVALQSRHSSKNSLQKINQ QWNELNDGHAGTRLIQQIEGILTNA
gene0518	Single	+	540078	540311	234	magnesium transporter MgtC	mgtC	GO:0016020;GO:0044425	COG1285	S	K07507	putative Mg2+ transporter-C (MgtC) family protein	-	ATGGCTAAAGAAGAAGAAAAGATGACTCGGGAAGAAGCAGGCAAGAAGGGCGGAGAAGCAACCGCTAAATCACACGACAAGGATTTCTACCAAGACATTGGTAAAAAGGGTGGCGAAGCAACTGCAGACTCGCATGACAAGGATTTCTACCAAGACATTGGTGAAAAAGGCGGGGAGGCAACTTCTGAAACTCACGACAAGGATTTCTACCAAGACATCGGCGAAAAGGGCGGAGAAGCAACTTCAGAAGCTCATGATGAAGAATTCTACCAAAAAAATGGAAAAAAAGGCGGAGAAGCAACTTCCAAATCCCATGGCAAGGACTTTTACCAAGAAATTGGTAAAAAAGGTGGAAGAGCTAACTCCGACGACGATTAA	MAKEEEKMTREEAGKKGGEATAKSHDKDFYQDIGKKGGEATADSHDKDFYQDIGEKGGEA TSETHDKDFYQDIGEKGGEATSEAHDEEFYQKNGKKGGEATSKSHGKDFYQEIGKKGGRA NSDDD
gene0521	Single	+	541666	541797	132	hypothetical protein	-	GO:0016020;GO:0044425	-	-	-	-	-	ATGCGAAAATTAAATTATAATCACCAAGACCAGTGGAAAAAAGAAGACCGGACGACACAATCACCAATCTTGATTGAAAAAGCCGAGTTAGAAGGCAAACAAAACCAAGTAATTAGTAGAACCAAACCGTACGCCGCTACAGAGGTACATAACAACCTTAATAACCTGTCTTTAACGGCTAATGGGGAAATTAAGTCTGACCGACGTCGCTTTCAATTAATGGAGGTCCACTTTCACCATCCGGCGGAACATCGTTTTGAGGGTGAAGTCGAGCCACGAGTTTTAGAAGCGCATTTTGTTCATTATGGTAGTTTGGAACAACCGCTGGTGGTTAGCGTTACATTTAAAATAGGTCCTAAAAATGAAGTGTTCGAGAAGGTATTAGATGCTATGGAGGAC…	MRKLNYNHQDQWKKEDRTTQSPILIEKAELEGKQNQVISRTKPYAATEVHNNLNNLSLTA NGEIKSDRRRFQLMEVHFHHPAEHRFEGEVEPRVLEAHFVHYGSLEQPLVVSVTFKIGPK NEVFEKVLDAMEDGAVTQPLILEELIPQDGNFYRYIGSLTTPPLTEGVEWLVFENAPTID LQQLNRYTAVFAAPNNRALQNLNGRRIEKYEL
gene0526	Single	-	544857	544525	333	hypothetical protein	-	GO:0005215;GO:0016020;GO:0044425;GO:0050789;GO:0065007;GO:0051179	ENOG41103Y5	P	-	-	-	ATGATTGTCGGATTAATCAAAAACTTACTGGCCAAATTTAAAATTGTGAATGTAGTCTTTTCGAACACAAAAAAGGACGACCTTACAGATCGTCCTTCCTTAAATATTAATAACTAA	MIVGLIKNLLAKFKIVNVVFSNTKKDDLTDRPSLNINN
gene0553	Single	-	573294	573166	129	glutamate:gamma-aminobutyrate antiporter	gadC	GO:0005215;GO:0016020;GO:0044425;GO:0051179;GO:0044699	COG0531	E	K20265	glutamate:GABA antiporter	ko02024	ATGAAGGAAATTGATGAACAACTCACCCAGGCTAAAGAACTCTGGGATGATGGTAAACAAGCCCAAGCAATCCAAATTTTGGAAGAACTTGACGAAAAGACGCCTACCACCCAGGTTGCGGAATTATTAAACCATTTTTACGTTGCTAATCAACAATATTCTGAAGCATTACAATTGGTCGCAAATCAGTCGACCAATTTTTTGCATCATCCGGGAGTTTTTGCGGATTATTTAGGGGCGTTAATTGCTACTAATAATTTCATTGTGGCGTGGAAAACTTTAGCGTCAGCCGATCAGCAGATGAAAATACCGGCGATGGTGACGCGCCTCGAAGAAGCCGAAGTCCGCTATCAGGAAGATTTTCCGCAAAGCGTGCGGGCCGATGAACGCCATTTTTAT…	MKEIDEQLTQAKELWDDGKQAQAIQILEELDEKTPTTQVAELLNHFYVANQQYSEALQLV ANQSTNFLHHPGVFADYLGALIATNNFIVAWKTLASADQQMKIPAMVTRLEEAEVRYQED FPQSVRADERHFYHLGDRQLADQIKAIKQAYHLPQKNYIRAASFNLVDPYLNQLTRVSIL KDLVDLRVERELDFIWLDEKSYRVVPAQIDAGRLRKELMRLIEQSADPVQAELLIQQAGL MYDLAFPFPERVFATAAGWLAALQAQFLAGKEVKQFHSLNKIMNSIMAS
gene0560	Single	-	583262	583098	165	hypothetical protein	-	-	-	-	-	-	-	ATGTGGGAAGAAATTTGGGAAAAATACCAAAAACCAATTATAATAGGAAGCATCTTGATGGCGGCTATTTTGTTAGTTGTTAGTTTGCTACGGCCGAAGAATACTGTGCAGTCCCCACAAGAAAACTCAGAAGTGATGATGGCGGGTTCGGAAGCTCAATCTAGCTCTGTAACTAGCAACCCTTCGACTGATAGTGTTCAAAAATCAGCTGGTAAGCAGAAGCTAATGGTGGACGTAAAGGGTGCGGTTAAAAAACCGGGAGTTTATGAAGTAAAACCGGGGATGCGGGTCGTCGACGGAATTGAACTGGCTGGCGGATTGACTGAATCTGCGGACCGCAAAAACATTAATATGGCTTTACAATTAAGTGACCAACAGGTAGTGTACATACCCATTAAA…	MWEEIWEKYQKPIIIGSILMAAILLVVSLLRPKNTVQSPQENSEVMMAGSEAQSSSVTSN PSTDSVQKSAGKQKLMVDVKGAVKKPGVYEVKPGMRVVDGIELAGGLTESADRKNINMAL QLSDQQVVYIPIKGEIKDFDPKQLMGTAGNAGNESLASSSSAGELVNINTADKNALLTLN GIGDKKADQIISYREEQGGFKTIDDLKQVQGIGDKIFAGLKDSITV
gene0571	Single	+	592885	593214	330	beta-galactosidase	bgaB	GO:0003824;GO:0008152	COG1874	G	K12308	beta-galactosidase [EC:3.2.1.23]	ko00052	ATGGGTAAGATTAATATAAAAAATAACGAGACGGCCGTTTATGCAATCGGTGGTCTAAATGAGATTGGAAAAAACACCTATGGAATCCAATTTCAAGACGAAATTATTGTTGTAGATGCCGGTATCAAATTCCCTGAAGACGAACTTTTAGGAATCGATTACGTCATCCCCGATTATCAATTTTTAGTCGCAAACCAACAAAAAATAAAGGCTTTAGTGATCACCCATGGTCACGAAGACCACATTGGTGGAATCCCGTTTCTACTACAACAAATTAACGTGCCAATCTATGCTAGTCCACTAGCTGCCGCCTTAATCCGGGGCAAACTTGAAGAGCACGGATTGTTAAAAACTACCGAAATTCACGAAATTAACGAAGATACCGTGATTAAGTTCCCT…	MGKINIKNNETAVYAIGGLNEIGKNTYGIQFQDEIIVVDAGIKFPEDELLGIDYVIPDYQ FLVANQQKIKALVITHGHEDHIGGIPFLLQQINVPIYASPLAAALIRGKLEEHGLLKTTE IHEINEDTVIKFPKTSVSFFRTTHSIPDTLGVAVHTPSGVIVETGDFKFDLTPTTHQPPN LQKMAKLGDEGVLLLMSDSTNAERDEFTKSERWVGKSIRKIFEEVQGRIIFATFASNISR IQMAAEAALKHGRKIAVFGRSMEAALVNGRELGYLDIPDEALVNAEEIRHLPADKVLIMC TGSQGEPMAALSRIANGTHRQISIEPGDTVVFSSNPIPGNTISVNNVINELEEAGARVIH GKVNNIHTSGHGGQDEQKLMLRLMKPKYFMPIH…
gene0597	Single	+	620648	620851	204	hypothetical protein	blpB	GO:0016020;GO:0044425	-	-	K20345	membrane fusion protein, peptide pheromone/bacteriocin exporter	ko02024	ATGAGTAACTTGTTAGCGGGCGGCTTAAGTGCCGTAATTACTTTAATAGGGATGCCCAGTTTTATCCATTATTTCCGGGCACGGAACGAAGGGCAAATGATCCGAGAAGAAGGCCCCAAGTGGCATCAAAAGAAATCTGGGACACCCACGATGGGAGGACTAGTTTTCATCGTGGCCATTATCGTGGCTGCGATCATCAGCGGGTTGGCGTTCCATTTATTGACCACCAACCTAGTGATGCTCCTCTTCGTTCTTTTAGAATTCGGTTTGATTGGTTGCTGGGATGACAGTATTAAATTATTAAAGCGGCAAAACGAAGGTTTTAAAGCTTGGCAAAAGCTGCTTGGTCAAATCATTGGCGGATTGATTTTTTACTGGGTCATTAAAGAAACTGGCGTA…	MSNLLAGGLSAVITLIGMPSFIHYFRARNEGQMIREEGPKWHQKKSGTPTMGGLVFIVAI IVAAIISGLAFHLLTTNLVMLLFVLLEFGLIGCWDDSIKLLKRQNEGFKAWQKLLGQIIG GLIFYWVIKETGVALQLSIPGIGIWHLGGWYALFVIFWLVGFSNAVNLSDGLDGLVAGLS TIAFATYAIIAAKLNQPAVMLFCWAVVGAMLAFLVFNHKPAKVFMGDMGSLALGGALGAV SIILNQELSLLLVGIVFVLETLSVILQVLSFKLTGRRIFKMSPIHHHFEMLGWSEWKVDT VFWIVGLIGALITLISIW
gene0599	Single	+	621310	621543	234	hypothetical protein	-	GO:0016020;GO:0044425	-	-	-	-	-	ATGGCTCAAAATAATGATTATGCTGGTCGTTCAAGAATGATTAACGAACCAACTTCAATTGCCGGAGTAGGGAAAAAAGAATTAAAAAAAGCCCGGGAGGTTGTAACTGCTCGACAACTGCCCTTGTCGAAGTTTGAAAAGTTTTTGATAACATTTTGCGGATTTATTTTGGTAGGGTTAATGCTTACCGTTGTTTCTGGTAAAATAAGTTTATCTAATGCACAGCATAAACTTGAAGCAACACAAGAGAAGACAACGGCCTTATCAAGCAAAAATACAACTATGAAACAAGAGGTTAATCAGTTATCCGACCAAAATCGGTTAAATAAAGTTGCTAAAAAGGCAGGCCTTTCTCTTAATTCAGAGAATATAAGGAATGTAAATAAATGA	MAQNNDYAGRSRMINEPTSIAGVGKKELKKAREVVTARQLPLSKFEKFLITFCGFILVGL MLTVVSGKISLSNAQHKLEATQEKTTALSSKNTTMKQEVNQLSDQNRLNKVAKKAGLSLN SENIRNVNK
gene0625	Single	+	644944	645072	129	hypothetical protein	-	-	-	-	-	-	-	ATGGTATTACAAGTAATTAGTAGTTTCAAAGGACAAACTTCAAATGGAACTTTATATTTGGTTCCAACTCCTATTGGAAATTTGGAAGATATGACACCTAGAGCGATAGAAGTTTTAGGTGAAGTAGATTTAATAGCAGCAGAAGATACTAGAAATACCCAAAAGCTATTAAATCATTTTAATATCAGTACTAAACAAATTAGTTTTCATGAACATAACACTAAGGAAAGAATACCCAAGTTAGTTGAAAAGTTAAAGACGGGTATAAATATTGCACAAGTTAGCGATGCAGGTATGCCATCTATAAGTGATCCTGGGCATGAATTGGTTGAGACATGTATTAAAGAAGATATACCAGTTGTACCACTACCAGGAGCTAATGCAGGTATAACAGCGTTA…	MVLQVISSFKGQTSNGTLYLVPTPIGNLEDMTPRAIEVLGEVDLIAAEDTRNTQKLLNHF NISTKQISFHEHNTKERIPKLVEKLKTGINIAQVSDAGMPSISDPGHELVETCIKEDIPV VPLPGANAGITALIASGLIPQPFYFYGFLPRKNSEQKQELTNLKGHTSTIIFYEAPHRLK KTLKNMLEVLGNRKVVLCRELTKKFEEFIRGNLEEVMEWANTSEIRGEFVIILDGNHNEQ VEENKVTTNLSIEEQVKELIEDRNLKPNQAIKEVAKENGLKKQEVYNLYHHLD
gene0642	Single	-	662933	662391	543	hypothetical protein	-	-	-	-	-	-	-	ATGGATACAGAAAAAATTGAAAAAATATACCGTGTTTTTAAGGAATCAACCGAACTATTACAAAAAAATTTGGACGTGGATTTTTTAGACGCGTTCATTGAAACGGGGGATAACTTAATTACGGGAGAAATCCAAGTTGAAGACGGTAAACCAGATCAAGTAACGGTACAAAAATTAAAGCAAGTTTACGCAGATTTTAACTGGCAGGAATATGAACCTGAAGAGCTTCGCAAGGCCATCCAATTGGTGATGATCCAAGCAAACCGGGTCGAACGCATCCAAGCTAATCACCAATTCACTCCGGAAGCAATTGGAATGCTTTTTAACTACATCATTGAGAATTTGCCGTTATCTCAAGATCAAGTATCAATATTCGACCCGGCAGTTGGCACGGGGAAC…	MDTEKIEKIYRVFKESTELLQKNLDVDFLDAFIETGDNLITGEIQVEDGKPDQVTVQKLK QVYADFNWQEYEPEELRKAIQLVMIQANRVERIQANHQFTPEAIGMLFNYIIENLPLSQD QVSIFDPAVGTGNLLSTILNYFQDHQVKFNGTGIDNDDTMLAIASMSFIFEHLKVDLYHQ DSIDNLLVKNADIVVSDLPVGYYPIDERTVGFETRSSEGHSFVHHLLIEQSMKAVRPGGF GVYLVPSNLFQTEEAKKLLAFFHDKIYLQAILNLPSKMFKDAKAQKSILILQKVGQNAKQ ADQVLLGEFPDFKEQKEMVAFLKDFKKWAQKSLK
gene0644	Single	-	664311	663844	468	hypothetical protein	-	-	ENOG410YUUW	S	-	-	-	ATGAACTCAGGCAAAAATTATAAATACGGATTTACGTTGGCTGAAGCAATTTTAGCATTATTAATTATGGTACTGATGGTTAACTTAACAATCATGGCAGTCAAAGCAACTAAGCATAAAGCTGAAGCTGATTTTGAAGACAAAATTACCGAGGTTGTTCAAGATTTAGAATCAAAGCGGCACGATTTTCGTTTGAAAGAAGTTCGCCCTAATCGCTTGATCTTGTATTCAGAAGCGCAAAAGAAGCGTTACGAGCTGGAGTACTATTCGCGAAAAAATATGCTGCGTTATACTCCCGGGCATATGCCGTTAATGCCGGGGGTGCGTGCGGTTTCTTTCAAACGGGTCGGTAATTTAGTTCAAATTAAAATGAAGGTTTATGGAGGCAACTATAGTGCG…	MNSGKNYKYGFTLAEAILALLIMVLMVNLTIMAVKATKHKAEADFEDKITEVVQDLESKR HDFRLKEVRPNRLILYSEAQKKRYELEYYSRKNMLRYTPGHMPLMPGVRAVSFKRVGNLV QIKMKVYGGNYSAYAFIPPAEKES
gene0648	Single	-	665911	665663	249	hypothetical protein	-	-	-	-	-	-	-	ATGGTGGATTTGTTAAAAATGGGCATTTCGCTAAGAAAAAGCGTAGATTTTATTCGTATTATGCGACCCTCGATTGCTAAACCGATGCAAAACGTGATTGAACAGCTGCAGCGCGGGCAATCTTTTTCGGCCGCCTTTCAGCCTTACGTAAGCACGAACATTTATTATCAACTGGCAATTGCAGATCAGCATGGGGGCCTTGTTAGGACGCTCAACACGATTGCCCAAATTTTCACCAGTCAGGAACAGCAACGAAAAAAACTACGGTCAGTGATCCAATATCCGTTATTTTTGCTATTGTTTTTAGGACTCATGATGGTGGGGATGCGGATTTACATCATGCCAGAATTAGCAGATTGGAATCGGGGAACTAAAAGTTGGGATAGCCAATTGATTAAG…	MVDLLKMGISLRKSVDFIRIMRPSIAKPMQNVIEQLQRGQSFSAAFQPYVSTNIYYQLAI ADQHGGLVRTLNTIAQIFTSQEQQRKKLRSVIQYPLFLLLFLGLMMVGMRIYIMPELADW NRGTKSWDSQLIKAGWVAVFLVALAALGYYFWKFKRSSITNQVNLLCRLPIIGPLYQNYC HYYLLANLSFLIANGMSVGSICKYLNQLDSKSLLHQIGRKVEHSIANGRQVDQIIQKAVY LPTELSLLIQKGSQKDALATEIYALSMMKYKNLISRIERLILVVQPILFGIIGIVIVIMY WNLLMPMYNSIKEVS
gene0650	Single	+	666546	666713	168	antirepressor	antB	GO:0005488	COG3561	K	K07741	anti-repressor protein	-	ATGACTAATAAAGTAGTTGTGCTAGGTAGTTTAAACGTGGATCGAATTTTACAGATGGATCGGGTCCCCGAACCTGGCGAAACATTAGCATTAAATAATCAAGACATGGCTGGTGGCGGTAAAGGAGCTAACCAGGCAATTGCTGCTGCTCGCTCTGGTGCGCAAACGAGTTTTATTGGCCGGGTCGGCGCAGACGAAAACGGTAAGTTCATGCTGCAACAGTTGGTTAATAGCGGAGTTACTACCGACTTGGTAGCGGTAGACGAGGATGCAGGTACTGGACAAGCATTTGTGATGGTAGAAAAGAGTGGCGAAAACCGAATTTTAATTTATGGCGGTGCCAATGCGCAATTATCCGCCACGGACGTGAAGAAGGCCCAAACACAAATTGCTGCAGCA…	MTNKVVVLGSLNVDRILQMDRVPEPGETLALNNQDMAGGGKGANQAIAAARSGAQTSFIG RVGADENGKFMLQQLVNSGVTTDLVAVDEDAGTGQAFVMVEKSGENRILIYGGANAQLSA TDVKKAQTQIAAADLMVAQLETPVETTQFAFQMAKELGVKTILNPAPAVAKLPAELLKNT DVITPNETEVEILTGIAVTDEAAMLKAAQRLHDLGVATVIITLGSKGVFYDDGAQHGIVP AFKVQAVDTTAAGDTFLGALSSELNPDLSNLKTAIEYGNKASSLAVQKMGAQPSIPTRKD ILK
gene0651	Single	+	666724	666876	153	hypothetical protein	-	-	-	-	-	-	-	ATGTCAGGACATTCAAAGTGGCATAATATTCAAGGCCGTAAAAACGCCCAAGACGCAAAACGTGGTAAAATTTTCCAACGGATCTCCCGGGAGATCTACGTGGCAGTTAAAGCTGGGGGTCCGGACCCTTCTGCCAACCCTCAACTTCGCTTAATGATGGATAAAGCTCGTGCAGCTAACATGCCAAAAGATAACATTAAACGTGCTATTGACAAGGGTAGCGGTACTGGTGGAGCTAACTACGAAGAAATTACTTACGAAGGTTATGGACCAGCGGGAACCGCAATTATCGTTTCTGCTTTGACTGATAATAAGAACCGGACGGCTGCAGCTGTTCGTTCTGCATTCACTCATCATGGTGGTTCACTAGGAGCTACTGGTTCAGTTTCGTACATGTTC…	MSGHSKWHNIQGRKNAQDAKRGKIFQRISREIYVAVKAGGPDPSANPQLRLMMDKARAAN MPKDNIKRAIDKGSGTGGANYEEITYEGYGPAGTAIIVSALTDNKNRTAAAVRSAFTHHG GSLGATGSVSYMFDRKGYIVIKREGLDKDEDQMMEDAIEAGADDVQTSDEVFEIYTDPKE FAAVRDALEAKGYDLANAELTMIPETETQVPADKVKQYTGLIDELENNDDVSEVYEAAVL PDDAE
gene0652	Single	+	666891	667193	303	hypothetical protein	-	-	-	-	-	-	-	ATGATTACAAAGTATCTATATGATGAAAACGCCTATGATTATCATGACGGTGGGTACCGCCCGTTAAAAAAGGCGCCTGGAGAAGAACACCCATTGAACGTTCCGGCTTTTTTGAAACCTGATCGAATAGAAGGAAATGAAATTTATTATACGGTAACTGCTCAAGCTGGAGAAACGAAGATTTTGCCTGGCAAGCCAACGCACACTTGGGGATACAACGGTAGTATTTTAGGTCCGGCAATTCAGTTTGAAACTGGTAAGACCTACCACGTCACTTTAAAAAATGAATTAGACGAGGTTACTACTTTCCATTGGCATGGATTGAATATTGTGGGACCCTACGAAGATGGGGGTCCTCATGCGCCAGTCTATCCGCACGGGGAACGTAAAATTACGTTT…	MITKYLYDENAYDYHDGGYRPLKKAPGEEHPLNVPAFLKPDRIEGNEIYYTVTAQAGETK ILPGKPTHTWGYNGSILGPAIQFETGKTYHVTLKNELDEVTTFHWHGLNIVGPYEDGGPH APVYPHGERKITFTVDQPAANIWLHPHPCPETARQVWNGLAAPVIITDGHEQSLKLPRRW GVNDFPVVLQDRSYHDNQLDYKADYDVDGTLGDYALVNGTVNPVVNVTKPIVRLRFLNGS NRREWRLHFADYHPFTQIGSDGGLLPEAVKMDRIMLTCAERADVLVNFSDYQPGQEVILQ TDDFDLIKFKIGDIKKENMLLPSPLAEIPALSVDENTPVFKTVMSGMDDQVRLDGKLFDM QRIDTRQQVDQTQIWEVSNTNDMEGGMIHPFHI…
gene0653	Single	+	667175	667300	126	hypothetical protein	-	-	-	-	-	-	-	ATGATTAAGTCTAAAATTGGGTCGATATTTTTTGTATTGCTCTACGTGTATTTGTTTTACTTGGTGGCTACTAACCAAATGATGCCCGCAATGTACGTAATGGCGGGCGGAATGCTGTTGGAGTCAGTAATATGCTTGATACATAACTTTAAAATGGGAGGGAAATCAAAATGA	MIKSKIGSIFFVLLYVYLFYLVATNQMMPAMYVMAGGMLLESVICLIHNFKMGGKSK
gene0654	Single	+	667314	667439	126	hypothetical protein	-	-	-	-	-	-	-	ATGGTTGAAGCAATTAATTTAAAAGCAGGAATGACGTTTATTAAGGATGGTAAGTTGATTAAAGTTCTTGAAACGAACCACCACAAGCCTGGTAAGGGAAACACGGTAATGCAAATGAAGCTTTATGACGTACGTTCGGGAGCTACCGTGCAAACTACGATGCGGCCAACCGAAAAAGTTGAGCAAGCAATTGTGGATACTAAGGAAGCCCAATACCTATATCGGCAAGACGATACGGCGATTTTCATGGACACGGAGACTTATGAACAATACGAACTACCAATTTCAAGTATTGAACAAGAAATGAAATACTTACTAGAAAATACGGAAGTGAAAATCAACTTCTATGGTGACGAAGTGATCGGGATTACGCTTCCAACTACGGTAGAACTCAAGGTT…	MVEAINLKAGMTFIKDGKLIKVLETNHHKPGKGNTVMQMKLYDVRSGATVQTTMRPTEKV EQAIVDTKEAQYLYRQDDTAIFMDTETYEQYELPISSIEQEMKYLLENTEVKINFYGDEV IGITLPTTVELKVVETSPSIKGATVTGSGKPATMETGLVVNVPDFVQEGETLIINTEKGT YTKRA
gene0655	Single	+	667454	667627	174	hypothetical protein	-	-	-	-	-	-	-	ATGGGGGCAAACGAAGCTTTACTGATTATTGATTATACAAATGATTTTGTTGCTACGAACGGAGCGTTAACGACTGGCAAGGTGGGCCAAGCAATTGAACCAGCCTTGATTAAAGCCGCTAATCGGGAACTTCGCGAAGGTGGTTGGGTAATGCTACCAACGGATCTACATGTTGAAAAGGATCCCTACCATCCCGAAACCAAATTATTTGATGCGCATAATTTAGAAGGATCCTGGGGACGGGAATTGTATGGCCAATTAAAGGACTGGTACGAATTGAATCAGGATAATCCGCGGGTCCGGCAGTTTGCTAAAACTCGTTATAGTTCCTTTGCGGGCACAGATTTAGACATTCGTTTACGTGAACGTCACGTAGATACTTTGCGATTAGCAGGGGTT…	MGANEALLIIDYTNDFVATNGALTTGKVGQAIEPALIKAANRELREGGWVMLPTDLHVEK DPYHPETKLFDAHNLEGSWGRELYGQLKDWYELNQDNPRVRQFAKTRYSSFAGTDLDIRL RERHVDTLRLAGVCTDICVLHTAVDAYDLGYQLIIDPTTVATFTEHGQEWALSHFKNALG ATIE
gene0663	Single	+	671677	671964	288	hypothetical protein	-	-	-	-	-	-	-	ATGTCACAACTAGAAAAAGTCCAAAAGTGGGTTGCTGATCACCGATTGGACGTTGCTTACATCAGTAATTTTGAAAGTATCAAGTATTTGACAGGTTTTGGGAGTGATCCGATTGAACGGGTTCTCGCGTTATTTGTTTTCCCTGACCAAGATCCATTCTTATTTGCTCCCGCTTTGGAAGTTGAAGCAATTAAAGACACCGGCTGGAAGTACCCCGTTTATGGCTACCTCGACCATGAACAACCCTTCCATTTAATTGCAAACTATATTCGGGAACGTAACGCCAACCCGGTCCACTGGGGCATTGAAGAAGACAATCTCACCGTAGATCGGTACGAAGTTTTACGTTCTGAGTTTCCAAATGCTAAATTTGAAGCAAATCTCACCCCCGTTTTTGAA…	MSQLEKVQKWVADHRLDVAYISNFESIKYLTGFGSDPIERVLALFVFPDQDPFLFAPALE VEAIKDTGWKYPVYGYLDHEQPFHLIANYIRERNANPVHWGIEEDNLTVDRYEVLRSEFP NAKFEANLTPVFEKLRMVKTADEIEKLKAAGAEADFAFQVGFDAVAAGKTEAEVAAELEY ALKKRGVMEMSFDTLIQAGAHAAEPHGATAMNKIENNELILFDLGTVHDGYISDASRTVA LGQLSDKQADIYKVCLEAQLTAQDYAKPGITAASLDKVARDIIDKAGYGEYFIHRLGHGM GMGEHEFPSIMEGNDLVLEEGMCFSIEPGIYIPGFAGVRIEDCVHITKDGCEPFTHTSKE LKYL
gene0665	Single	+	672534	672776	243	hypothetical protein	-	-	-	-	-	-	-	ATGACAGGAGGCGGAATTGCAGCCATCATCGCGGCGATCGCGTTGTTGATTTTGGTATTGTTTATCGGCTTAGTGCTGGTGAATGCTTCAAAGACCTTGGCAGAAATAAATCGTAGTTTAGCAATCATTACTAGAGATGTGGATTTGATTTCACATGAAGCAGAAGGCATTATGGCTAATGCAAACGAGTTGCTGGAAGACGTTAACGGTAAGGTCGCAACGATTGACCCACTTTTCCAAGCGGTTGCGGATTTGAGCGAGAGTACTTCGGACCTAAACCAAGCTACCCGGCGACTTGCTGGGAAAGTCAACCATACCGCAAAAACTAAAAAAACGGGAAAGGTTGCCACAGCTATGAACGTTGGCAAAGGCGCGGTTAATTTATACAAAAATCGGCAA…	MTGGGIAAIIAAIALLILVLFIGLVLVNASKTLAEINRSLAIITRDVDLISHEAEGIMAN ANELLEDVNGKVATIDPLFQAVADLSESTSDLNQATRRLAGKVNHTAKTKKTGKVATAMN VGKGAVNLYKNRQKNKQEVK
gene0666	Single	+	672781	673053	273	hypothetical protein	-	-	-	-	-	-	-	ATGCCCCAAACCTTACTTATCGGCGCTGCTTTTCAGCCGCTTCAAAGAGAATTATCGCGGATTGATTGGAGTCAAATTGGCGCTAATTTTCTTAAACATTTTTTACAAATAATTCTCATCAGTATTATTTTTTGGGTGATTAACCGGATTGGTAAACACTTAATTAACAAAAGTTTCGGTCCCTATCAAGCCCCTGAAAAGCAATCTGCTCGTTCTCAGACCATTTTCGTAGTAGTAAGAAACATTTTCAAATATTCCGTAATGTTTTTCTACGTTTACACGATTCTTTCCAACCTGGGGGTCCCGGTTGGTACACTGGTTGCTGGAGCTGGAATCCTTAGTGTGGCAATTGGTTTAGGAACTCAAGGGCTGGTTTCTGACGTAATTAACGGCTTGACC…	MPQTLLIGAAFQPLQRELSRIDWSQIGANFLKHFLQIILISIIFWVINRIGKHLINKSFG PYQAPEKQSARSQTIFVVVRNIFKYSVMFFYVYTILSNLGVPVGTLVAGAGILSVAIGLG TQGLVSDVINGLTILIEGQLRVGDSVTIQSIDGTVVSIGLRTIELRALDGTLHYLPNRSI TTISNHSQENQNITIFLRIKDPFRIDEAKDLLQDQLPKAKHHTTKLKAGIVIQAPVAEKS HGYLGVQISTKVAPGYQAAMQTMILDRTLKILREAQIEVEN
gene0667	Single	+	673040	673312	273	hypothetical protein	-	-	-	-	-	-	-	ATGAGTAATCAAATTTTAATAGCGACCAAAAATGAAGGTAAATTAAAAGAATTTAAACAGATTTTTACTGCGAAGGGAATTGAAGTTCTGTCGTTAAAGGACGTTGATGAAGATGTTGACGTTCAAGAAAATGGTTTAACATTTGAAGAAAATGCGCGACTTAAGGCAGATAGCTATGCTAAAACTATTGGAATTCCGGTCCTCGCAGATGATTCTGGGTTAGAAATCGATGCACTTAACGGCCGCCCCGGAATTTTCTCGGCACGGTATGCTGGGGACCATAACGATGCTGCTAATAACGCCAAAGTGCTTACTGAATTGGGAGGGGTTCCTGACGAAAAGCGGACCGCAACCTTCCACACCACCGTGGTGGTTCGGAAACCGGATGGCACCGAATTA…	MSNQILIATKNEGKLKEFKQIFTAKGIEVLSLKDVDEDVDVQENGLTFEENARLKADSYA KTIGIPVLADDSGLEIDALNGRPGIFSARYAGDHNDAANNAKVLTELGGVPDEKRTATFH TTVVVRKPDGTELVANGNLRGRILSVPRGDNGFGYDPLFYVEEKQKTLAQMTREEKNQIS HRALAIQDLLTKFDKFW
gene0668	Single	+	673332	673853	522	phage methyltransferase	-	GO:0003824;GO:0008152	ENOG4111IZQ	S	-	-	-	ATGGATAATCGTCCAATTGGATTTATGGATTCCGGAGTCGGCGGATTAACCGTGGTAAAGGCGGCTAAGGAACTAATGCCTAACGAAGCAGTCGTTTTTATTGGGGATGAAGCTCGGGTACCGTACGGGCCACGTCCCACGACGGAAGTAATCAAGTTTTCGCAACAAATGGCGGATTTCTTAATCAAACAGGATGTTAAAGCGTTGGTAATTGCGTGCAATACGGCTACGAACGCGGCTTTTCAGATTTTAAGTACAACGTTACCAATTCCAGTGATTGGAGTTATTCAACCGGGAGCGCAAGCCGCAGTGGCAACTACACGTAACAATCGGATAGGAGTAATTGCGACTGAGGGAACCATTAAATCACAAGCGTATTCAACAGCGTTAGCAGCTTTA…	MDNRPIGFMDSGVGGLTVVKAAKELMPNEAVVFIGDEARVPYGPRPTTEVIKFSQQMADF LIKQDVKALVIACNTATNAAFQILSTTLPIPVIGVIQPGAQAAVATTRNNRIGVIATEGT IKSQAYSTALAALAPQTEVFPVACQSFVELAEHNQLTTPEALQVIDQQLVGLKNQGIDTL VLGCTHFPLLAKGIQTAVGDQVKLVDPGVAAVQQLKDVLERQGLLREATSTPDEQYFATA NIASFRTIAQNFLAPDIQVNLAKID
gene0669	Single	+	673850	673972	123	hypothetical protein	-	-	-	-	-	-	-	ATGAGTAGCCGTGAAAATGCAAATGTATTGTGGTTTGACGAACTGCACCGTGAAGACGTAAATCTGGTTGGTGGTAAATCATCATCATTAGGGGAAATGACGTCGGCAATGGACGTTCCGGTGCCGTATGGTTTTGCAACTACTGCGCGGGCGTACCGGTACTTTATGGAGCAGACGGGCTTAAATGATCAAGTTAACGAGTTGCTAGAAAGTATTCAGGATTACGAAAATTCTGAAGAATTGCATTCAGCATGCGAGCAAATCCGGAATTTAATTGTTAACGCCACCATGCCTGCAGATTTGGCAAAGGACATTGAACAAGCGTACGCGGATTTGGCCAAAAAAGTTGACCAAGACGCCCCCTTCGTTGCGATTCGTTCTTCCGCAACGGCCGAAGAT…	MSSRENANVLWFDELHREDVNLVGGKSSSLGEMTSAMDVPVPYGFATTARAYRYFMEQTG LNDQVNELLESIQDYENSEELHSACEQIRNLIVNATMPADLAKDIEQAYADLAKKVDQDA PFVAIRSSATAEDLPNASFAGQQETYLNIKGAADVVNRVQLCYSSLFTDRATYYRHKQHF PHEKVALSAAVQMMVFSKASGIMFSVNVADGDDSKIVIDAIYGLGEYVVLGKVTPDHFVI DKETMKIVEKNIIKQPIQLVRVADGGTVEEKVPEELQGQPVLSDSQVIELAGYAKAIEEH YGCYMDMEFALDANTDRLWIVQARPETVWSQRKAADHADEEDADVVKEADAKVAVRGLPA SPGLASGVVHVIDNPKDIDQFKQGEVLVTVMTS…
gene0670	Single	+	674213	674626	414	hypothetical protein	-	-	-	-	-	-	-	ATGGTTGAAGCAATTACGGACGCAAATTTTGAAGAAAAAACTGGTACTGGCGTAACGTTGACCGATTTTTGGGCGACTTGGTGTGGTCCATGTCGGATGCAATCCCCGGTAGTGGAACAATTAGCCGACGAAATGGGCGACCAAGTTAACTTTACAAAGATGGATGTTGACCAAAATCCGGAAACTGCCCGGAAATTTGGGATTATGAGCATCCCTACGCTAATGGTAAAGAAGGATGGCGCGGTAGTTGATACCATCGTGGGTTATCATTCTAAAGAACAGTTAGCAAAGATTTTAAATCAATACCTATAA	MVEAITDANFEEKTGTGVTLTDFWATWCGPCRMQSPVVEQLADEMGDQVNFTKMDVDQNP ETARKFGIMSIPTLMVKKDGAVVDTIVGYHSKEQLAKILNQYL
gene0671	Single	+	674623	675084	462	Holliday junction DNA helicase	-	GO:0005488;GO:0009987;GO:0008152;GO:0050896	COG4570	L	-	-	-	ATGAACAGTAAAATTTTAGAAGTTTTAGAATATGAAAAAGTGAAAATTGCGGTTAAACAGTTCATTGCGACCGAAAACGGGGCCAAGGAGCTTCGCCAATTAGTTCCAATGACGGATACCGCCAAAGTACAAAACGCCCTTAAGGAAACTCTGGACGCGGTTAACATTTACCGGGTGAAAAGTGGAATTCCTATTCCGCGTTTAGAAGATATTGACGAACCATTACAACGTTTAAAAATTGATGCGACCCTCAACGGTCGCGAAATTGCGCAAATTGGACGAGTGTTGCGAGCAACCCGGGAAGTAATTAATTTCTTTGCGGATTTACCAGATACGGAAGTAACGGTAGAAACCCTGAACGGCGTAGTGGATCAGTTAGAAACGATTCCAGAAATTGAA…	MNSKILEVLEYEKVKIAVKQFIATENGAKELRQLVPMTDTAKVQNALKETLDAVNIYRVK SGIPIPRLEDIDEPLQRLKIDATLNGREIAQIGRVLRATREVINFFADLPDTEVTVETLN GVVDQLETIPEIEERLNSSIEGNGHLLNSASSELRRIRAAITRVEGEIRQRMEKFTRGSQ AKYLSEPIVTIRSERYVIPVRVDSRSRFGGVVHDQSSSGQTLYVEPEAVVDLNNQLRQEQ VAEVHEEQRILQELSALIAPYVDTLKDNSKVLGHLDLLNAKAQYAHKLKATEPQISTNNR INLRQARHPLIDPKKVVPNDIRLGGEYSTLVITGPNTGGKTITLKTVGLLQLMAQSGMFI PANENSTVRVFEEIFADIGDEQSIEQNLSTFSS…
gene0672	Single	+	675086	675208	123	hypothetical protein	-	-	-	-	-	-	-	ATGGATAACGAAGAACAAAAAATTACCCTAGTAGACGAACACGGCAACGAAGAACTATATAACGTATTGTTTACGTTTGATTCAGAGGACTATGGTCGTTCGTACGTCCTACTTTATCCGGCTGAAGCAGAAAATGATGAAGAAGTGGATATTCAAGCTTACGCCTTTGAACCTGATGAAAATCATGATTTAGGCGAAGGTGAATTAATCCCAATTGAATCTGATGAAGAGTGGGATATGGTTGAAGAAGTCTTAAATACCTTCTTAGGTGACCAAGACTAA	MDNEEQKITLVDEHGNEELYNVLFTFDSEDYGRSYVLLYPAEAENDEEVDIQAYAFEPDE NHDLGEGELIPIESDEEWDMVEEVLNTFLGDQD
gene0674	ORTHOMCL1985	+	675620	676204	585	ArpU family transcriptional regulator	-	-	-	-	-	-	-	GTGGGAAAACTTGATGAAACCATGTTCTTCGATTTTGGCGATAATAAGCCAAATGACGTTCGGGGAACGTTAAAAACCGTATACGATGCTCTTGAAGAAAAGGGTTATAACCCAATTGATCAAATCGTGGGATATTTGATTTCTGGTGATCCAGCTTACATCCCGCGGCTAAACGATGCGCGGAATTTAATTCGTAAGCATCAAAGAGACGAAATTATTGAAGAATTAGTAAGATACTATTTATCAGATCAAGTTGCTGGTGGCAAGAAGGATAAGAATTAA	MGKLDETMFFDFGDNKPNDVRGTLKTVYDALEEKGYNPIDQIVGYLISGDPAYIPRLNDA RNLIRKHQRDEIIEELVRYYLSDQVAGGKKDKN
gene0681	Single	+	682320	682619	300	hypothetical protein	-	-	-	-	-	-	-	ATGTTATTAGCAGCCGCAAATGGTGGTTTTGGGATGAGTACGATTGTTTTCTTCATCTTGATCTTCGGTTTAATGTATTTCATGATGATTCGTCCACAACGTAAGCAACAACAAAAGCGCCAAGAAATGATGAACCAATTAAACGTTGGTGATGAAGTAGTTACAATTGGTCGTTTGCACGGCGTGGTTGATTCGATCGACAACGAAGCTAAGACGGTTACGTTAGATTGTGACGGGATTTATTTGGTATTTGACCGAATGGCAATCATGCGAGTTGAAAAGAAGCAAAACGTTGCCCCAGCATCAACAACTGAGCCAACTAATGCAGATACAACTGATGATGAAAAATCTGATTCAACTACGGAAGAAAAGTAG	MLLAAANGGFGMSTIVFFILIFGLMYFMMIRPQRKQQQKRQEMMNQLNVGDEVVTIGRLH GVVDSIDNEAKTVTLDCDGIYLVFDRMAIMRVEKKQNVAPASTTEPTNADTTDDEKSDST TEEK
gene0683	Single	+	683392	684381	990	N4-gp56 family major capsid protein	-	-	ENOG4110INW	S	-	-	-	ATGACATTAACAACCGAAGACTTTAACTATGATTTACCACACGAATTAATTGCCCAAACTCCGATTAAAAAGCGGGACGCTTCCCGGATGCTGGTATTAGACCATAAAACTGGCGAAATGGCGGATAAACATTTTTACGACATTGTTGACCAGCTTAATCCAGGAGACGCGATCGTAATGAACGATTCCCGGGTCATGCCAGCACGGATTTATGGGGTCAAGGAAGAAACTGGCGGCCACCTCGAAGTTTTACTGCTGCACAACATTGAAGGCGACCGTTGGGAAACGTTGGTAAAACCAGCGCGACGTGCCAAAGTAGGTACCAAGATTACGTTCGGAGATGGCAGTTTAACGGCGACCGTTAAAAAGGAACTTGACCATGGCGGACGTGAAATTGAA…	MTLTTEDFNYDLPHELIAQTPIKKRDASRMLVLDHKTGEMADKHFYDIVDQLNPGDAIVM NDSRVMPARIYGVKEETGGHLEVLLLHNIEGDRWETLVKPARRAKVGTKITFGDGSLTAT VKKELDHGGREIEFEYDGIFMEILEKLGEMPLPPYIKEKLDDPERYQTVYSKEPGSAAAP TAGLHWTKELLQKVQDKGVKLVYLTLHVGLGTFRPVDEENIEDHKMHSEFYRLSEESAAT LNEVRKNGGRIIATGTTSIRTLETIGTKFNGEIKPDSGWTDIFIKPGYEWKVVDAFITNF HLPKSTLVMLVAAFTGRETILNAYKHAVEEKYRFFSFGDAMFIK
gene0684	Single	+	684381	684587	207	hypothetical protein	-	-	-	-	-	-	-	ATGGATGATGAACGAATTACGTCTTCGGCCGTTCAGGGAGCCCAAGAAGAGGCTAACGAGCAATCATTACGCCCCCAGAACCTAAGACAGTACATTGGTCAAGCCCAAATTAAGCATGAACTGTCCGTATACATTGAAGCGGCGAAGAAACGTGAAGAAGCGTTGGACCACGTACTGTTGTATGGACCACCGGGATTAGGGAAGACCACTTTAGCAATGGTAATCGCAAATGAAATGGCAGTCCAGATTCGAACAACCAGTGGTCCCGCAATTGAAAAGCCGGGTGATTTAGTGGCCCTCTTGAACGAATTGCAACCGGGTGATATTTTATTTATTGACGAAATTCACCGGCTTCCTAAAGTAGTCGAAGAGATGCTTTATTCGGCAATGGAAGATTTC…	MDDERITSSAVQGAQEEANEQSLRPQNLRQYIGQAQIKHELSVYIEAAKKREEALDHVLL YGPPGLGKTTLAMVIANEMAVQIRTTSGPAIEKPGDLVALLNELQPGDILFIDEIHRLPK VVEEMLYSAMEDFFVDIVVGQGPTAHPIHFPLPPFTLIGATTRAGLLSAPLRDRFGIVEH MNYYTEDDLANIVKRSAEIFKTNIDDQGAHEIARRSRGTPRISNRLLKRVRDFAEVENDA HIDRTLVQTSLKLLQVDDRGLDQTDKKVLTTMIELYGGGPVGLTTIAANIGEEPDTISEM YEPYLLQIGFLKRTPRGRMVTERAYAHLGLENLYMNK
gene0685	Single	+	684562	684903	342	hypothetical protein	-	-	-	-	-	-	-	ATGTATGAATATTTAAATGGTGTCGTCGTGGATATCAATCCCGCCTACATCGTAATTGACGTGAACGGGGTCGGCTACTTGGTTAACGTAGCTAACCCCTATAGCTTTAAAGCAGATGAAAAGCAAAAGGTTTACGTGCATCAGGCGGTTTCAGAAACTGAAAACACGTTGTACGGATTTAAAAAATACGCGGACAAAGAGCTCTTTTTGAACCTGCTTAAGGTTAAGGGAATTGGACCTAAGAGTGCGCTGGCAATTTTGGCTAACGATGATCACCAGGGTTTTATTCGGGCGGTTAACAACGATGACGTTAACTACTTGAAAAAATTTCCTAAAATTGGTCCCAAAGCGGCTAAGCAAATTATTTTGGATCTGAAGGGCAAAATTACGAGCAAGGAA…	MYEYLNGVVVDINPAYIVIDVNGVGYLVNVANPYSFKADEKQKVYVHQAVSETENTLYGF KKYADKELFLNLLKVKGIGPKSALAILANDDHQGFIRAVNNDDVNYLKKFPKIGPKAAKQ IILDLKGKITSKEPSGPLFEMPTTTNNTLDEAIEALAALGYSERELKKITPKLDELSNQT TDQYISAGLKLLMKG
gene0686	Single	+	684913	685362	450	hypothetical protein	-	-	ENOG41101EQ	S	-	-	-	ATGGCAAAAATCCAAGAGTTAAGCGATATTTTAGCCGACCAGATTGCTGCAGGAGAAGTAGTTGAACGACCGGCTTCGGTGGTTAAGGAACTAGTAGAAAATGCAATCGATGCGGGAAGCAGCCGCATCGATATTCTCTTAGCTGAATCAGGATTAAAAATGATCCGGGTGATTGACAACGGAAGCGGGATTGAGGGTAGTCAAGTAGAGACGGCCTTTAAACGGCATGCAACTAGTAAAATAACTTCGCGTGCCGACCTGTTTCGGGTGGGGACCCTCGGTTTTCGAGGCGAAGCGTTACCCAGTATCGCATCAATTGCGGATGTTAAAATGACGTCTTCCACAGCCGAAGGGCCCGGTCAATTCGTGCATTACCGGGGCGGAGAACTAATCGAGCAT…	MAKIQELSDILADQIAAGEVVERPASVVKELVENAIDAGSSRIDILLAESGLKMIRVIDN GSGIEGSQVETAFKRHATSKITSRADLFRVGTLGFRGEALPSIASIADVKMTSSTAEGPG QFVHYRGGELIEHREAQSRQGTDITVSDLFFNTPARLKYLKSLATELSKITDIINRIALS YPEIAFSLQNDERQLMRTSGQGNVQQVLANIYGTHNAQKMLDIHGESVDFRIDGYVSLPE FTRANRSYITILVNGRYIKNFHISKAIIEGYGSKLMVGRYPVAVINIQTDPLLVDVNVHP SKLEVRISEENALTELISKTIFDRLADQNLIPDAVDNLKKKRISKPAGEQLDLTETVLSG SFGKGKDTPTESAAVEGDESAAALHPSVATTKP…
gene0687	Single	+	685364	685747	384	hypothetical protein	-	-	-	-	-	-	-	ATGCCACAAAAGACAAGTGATACGCCAATGATGCGTCAATATATGGAAATTAAAAACCAGTATCCGGATGCTTTTTTATTTTACCGGATCGGGGATTTTTACGAGTTGTTTTACGACGACGCCATTAAGGGTTCACAGCTGCTAGAATTGACGCTTACGGCAAGGTCGAAAAATGCGGACGACCCCATTCCAATGTGCGGAGTGCCGCATCATGCCGCCCAAAATTACATCGACATTTTAGTTGACCAAGGGTATAAAGTGGCAATTTGTGAGCAGATGGAAGACCCTAAGGCCGCCAAAGGAATGGTGAAACGGGAAGTAATCCAACTCGTTACCCCAGGTACCACTACGGATCAAAAGGCGGAAGACGCTAAGGAAAATAACTATTTAACGGCAGTG…	MPQKTSDTPMMRQYMEIKNQYPDAFLFYRIGDFYELFYDDAIKGSQLLELTLTARSKNAD DPIPMCGVPHHAAQNYIDILVDQGYKVAICEQMEDPKAAKGMVKREVIQLVTPGTTTDQK AEDAKENNYLTAVSFDAATKKYGFAYTDLSTGELKVAILDDIESVVNEAVGLRTREIVAD QYFVEHFGERFKELNILVSQQNDVEISAELSYLIQDLTSPIAVQVVKQLLMYVQVTQKRN LAHMQKAIAYEPSFYLRMDHASKYNLELTRLIRTGKKQGTLLWLLDETKTAMGGRLLKQW LDRPLIRKDAINARQSRVQVLLEHFFERSNLQEELTKVYDLERLAGRVAFGNVNGRDLIQ LKTSLLQIPKIRHVLAELDDPVFDEALTRLDPV…
gene0688	Single	+	685731	686201	471	hypothetical protein	-	-	-	-	-	-	-	ATGGTAATTTATTATATTATCCTCGCAATCATCGCTATAGTTGTTGGCTATTGTGCAGGATACATTATGCACAAGCGGTTCATTGAAAAGCAAACTGCAGATGCTAGTAATTCAGCTGATCTAATTATTGAAAATGCGCGACAACAAGCGGAAACTGAACGTCGGGAAAAGCTTTTGGAAGCAAAAGATGAAAGTCATCGTTATCGTGCGCAGGTTGAAAAAGAGCTTAAGGAACGTCGGGCGGAATTGCAAAAGCAAGAAGACCGACTTCTTCAAAGAGAAGACGTCCTTGATCGTAAGGATAGTTCCTTTGAAAAGCGCGAAAACAGCCTAGAACGTAAAGAGCAGAAACTAGCTGCAGATCAAAAGCTAATTGATGAACAACAACAAAAAGCATCA…	MVIYYIILAIIAIVVGYCAGYIMHKRFIEKQTADASNSADLIIENARQQAETERREKLLE AKDESHRYRAQVEKELKERRAELQKQEDRLLQREDVLDRKDSSFEKRENSLERKEQKLAA DQKLIDEQQQKASSLVEERQQELERVSNLTQEDAKSLIISEVKAKLEKERALIIKESLED AQNQADETARKVIAQAIQRSAADMASETTITVVSLPNDDMKGRIIGREGRNIRNFENVTG VDLIIDDTPEAVVLSSFDPIRREIAHIALEKLIQDGRIHPARIEEMVEKAKKELDDTIRK TGEQAVFELGIHSMNPELIKLIGQLRYRTSYGQNVLNHSIEVANLAGVLAAELGEDVTVA KRAGLLHDIGKAVQHETDTSHVELGVELAKKYK…
gene0689	Single	+	686194	687294	1101	hypothetical protein	-	-	ENOG4111UPU	S	-	-	-	ATGGGGAGAAAAGAAGTTGGGATAGTTCCAGCTTCTTTTTCTACGTTATCAGTAATTGAAAAAGACCTGTTTAAACTAATAATTTACCAAACCCTTAAAGGAGTACGTAGCTTTCGCAAAGCTAGCACTAATCAGCGTTGGGCGCTAAAGACTTATTGA	MGRKEVGIVPASFSTLSVIEKDLFKLIIYQTLKGVRSFRKASTNQRWALKTY
gene0690	Single	+	687306	687704	399	hypothetical protein	-	-	-	-	-	-	-	GTGGCAGATGAAAGAAAAGAAGCTTTGAATAAAGCTCTTAAAAAAATTGAAAAAAACTTTGGAAAAGGTTCCATCATGCGGATGGGGGATGCGGTTGATACCCAAATTTCCACCATTCCAAGCGGTTCGCTAGCGCTAGACGATGCGTTAGGTGTAGGCGGTTATCCTAAAGGACGGATTGTTGAGATCTACGGTCCTGAAAGTTCAGGGAAAACTACGGTTGCGCTTCACGCGGTAGCCGAAGTTCAAAAGCGAGGCGGAACGGCTGCGTACATTGACGCGGAAAATGCAATGGATCCAGCTTATGCAACTAATCTGGGAGTTAACATTGACGACCTCTTACTTTCCCAACCAGATACTGGGGAAGAAGGTTTGGCAATCGCAGACGCTTTAGTTTCA…	MADERKEALNKALKKIEKNFGKGSIMRMGDAVDTQISTIPSGSLALDDALGVGGYPKGRI VEIYGPESSGKTTVALHAVAEVQKRGGTAAYIDAENAMDPAYATNLGVNIDDLLLSQPDT GEEGLAIADALVSSGAIDLVVIDSVAALVPRAEIDGEMGDAHVGLQARMMSQALRKLSGS INKTKTIALFINQIREKVGIMFGNPETTPGGRALKFYATIRLEVRRAEQIKDGSDVIGNR VKIKVVKNKVAPPFKRAEVDIMYGEGISQTGEMIDMAVEKDIVGKSGSWYSYGEERIGQG RENAKKYMEDHPDVRAEVLAKVREAYGMVADPASEVKEDSKQDDQAELDLK
gene0691	Single	+	687783	688112	330	hypothetical protein	-	-	-	-	-	-	-	ATGAAGGCGGAAATTATTTCAGTTGGTACCGAGATTTTGTTAGGTGAAATCACCGATACTAACGCCGTTTATTTGAGTCAGCAATTAGCCCAGCTAGGAATTGACGTTTATCACCAAGCAACGGTGGGCGATAATTCAACTACCATGAAGGAAACGCTGGAAATTGCCAGTAAGCGCAGCGACTTAGTGATCACCATTGGGGGATTAGGACCGACTGAAGATGATATTACTAAACCAACGTTGGCCGCGTTTTTAGGTGAAGAATTAGTGGTTGATGACCGGGCGCTAGAAAAGGTGCACGAGCACTTTACTAAGCAGGGGCGTCCCATCACACCCAATAATGAACGGCAGGCGTTGTTATTAAAAGGGAGTCGTCCGGTGCAAAATCCCAACGGGTTA…	MKAEIISVGTEILLGEITDTNAVYLSQQLAQLGIDVYHQATVGDNSTTMKETLEIASKRS DLVITIGGLGPTEDDITKPTLAAFLGEELVVDDRALEKVHEHFTKQGRPITPNNERQALL LKGSRPVQNPNGLAIGLFATTPTTDYLVLPGPPSEFKPMVNQEVLPLLKERYSLDKTIQS KTLHFVGVGEADLATRVDDVIRRQSNPTIALYFKPTDVTIRLTAKADSKDEAEQMLEKTK AEVLARAGDYYYAEGEQVAFSDFVVQELIKRKLTLTAAESLTGGAFQNQLVETAGTSAVF SGGFVTYSDEVKTSLLGVRPETIAQYTVVSRPVAEEMARGAQKQLGTDLAISFTGVAGPE GLEGHAPGDVWIGLALPDGSTVAKGFHFSGNRE…
gene0692	Single	+	688159	688299	141	hypothetical protein	-	-	-	-	-	-	-	ATGAACTTACCAAATAAACTAACCGTTTTTCGGATTATTTTAATTCCGATTTTTATCATCTTGACCGTTATGCCAGAAGTCGGAGGGAGCGTATGGTGGTTGGGCACCCCGATTGCCATCACTAAAATTTGGGGAGCCGTGGTTTTTGCGGTAGCTTCCATCACTGATTTTCTTGACGGTCAAATTGCTCGGCGCCAACATTTGGTAACTAATTTCGGCAAATTTGCTGATCCGATTGCGGATAAAATGTTAGTAATGTCGGCGTTCATCATCTTGGTGTCCATGAAAATGGCTCCGGCGTGGGTGGTAGCCATCATTGTGTGCCGAGAACTAGCAGTTAGTGGGTTGCGATTGATTATTGTAGAAAACGAAGGGGAAGTTTTAGCTGCGGCGATGCCT…	MNLPNKLTVFRIILIPIFIILTVMPEVGGSVWWLGTPIAITKIWGAVVFAVASITDFLDG QIARRQHLVTNFGKFADPIADKMLVMSAFIILVSMKMAPAWVVAIIVCRELAVSGLRLII VENEGEVLAAAMPGKIKTFSQMFAIIFLLLNNLFANYLHFGPGTVLLYVCLFFTIYSGID YFYQNRSIFADSF
gene0693	Single	+	688289	693082	4794	hypothetical protein	-	-	-	-	-	-	-	ATGGGGACGAAAAAATACAAAGTAATTGGGATGCGGTTGCAAGATGCCCGTCTCAAAAAGGGTTGGACACTTGACGAAGTTCAACTAAAGTTACAAATTTCTAAACGATATTTAATGGCTTTAGAAGCTGGTGAAGATGATGATTTGCCAGGAGACTATTACACCCAGTCGTTAATTAAGCAATACGCGAATTTACTAGGGGTGGAAGTGGGCAACCGTCATTTAGAAAATGAGCCCGAAAGTATCAAGGAATGGCGACGAACTCATGGAGAAGTTACTAGCCGTGCGCAAAAAGAACTTCAACAAAAGCCGTCGGTACTGAGCGGCTTAATTCATCAGCACCCGTGGTTGATGGGAATTATTTTAGTTGGGGTGATATGGTTATTAGTTTGGGCAGCC…	MGTKKYKVIGMRLQDARLKKGWTLDEVQLKLQISKRYLMALEAGEDDDLPGDYYTQSLIK QYANLLGVEVGNRHLENEPESIKEWRRTHGEVTSRAQKELQQKPSVLSGLIHQHPWLMGI ILVGVIWLLVWAAFSEMANRYPSQLVAQKNPTVIDKTKKSHHKTNASKTKSTHPSAKKQS KQTTTEPKIEKVNDSVDNLRVTLPDEQKHATLKLKTGDNQSWNSLTATAPQAATVAQGVM EAHQTQHFKLKKGYTYVLKIGNTIGLKGSIGGRKMPDPATGVTVRSVTIVVN
gene0694	Single	+	693086	693649	564	hypothetical protein	-	-	ENOG410YPBZ	S	-	-	-	ATGAAGTTTGCGTTGGTATGTGGAGCGAGTGGAAACATTGGGATGGCAATTAGTCGACGATTAGCTAAACAAGGCTGGTCCTTATATTTACATTACCACCAGCACGCTGCGGCGGTAGAAGAATTAGTGCAAGAATTACAGCGGCAATACCCAAAACAAGACTTCCTAATGGTTCAAGCAGATTTTCGAAACGAAGCGGCGGCAGAGGAAATCGGTGCGCAAATTTTTAGCTTGGACGCGATTGTTTTTGCACAGGGAACCACGATCTACCAGTTGTTCGATGAATTTGACGGTACCCAGTTAGAAAATTTATGGTTAGAACACCTTAAAGTTCCGTTATTGGTAATTAGAAAATTAGTTTCTAAACTGGCAGAAGGCGGTCACGGACGAATTGTCTTT…	MKFALVCGASGNIGMAISRRLAKQGWSLYLHYHQHAAAVEELVQELQRQYPKQDFLMVQA DFRNEAAAEEIGAQIFSLDAIVFAQGTTIYQLFDEFDGTQLENLWLEHLKVPLLVIRKLV SKLAEGGHGRIVFIGSVYGAVGSAMEVPYSMLKGAMSSFANAYAKEVASLGITVNVVAPG AVQTQMNANFAEDEIEAISEEIPVGRFAKPDEIAYLVETVLAETASYLTGQTIYVDGGWQ K
gene0695	Single	+	693649	693984	336	hypothetical protein	-	-	ENOG410Y2IT	S	-	-	-	ATGCAAATAAAGGAAAAGGCATATTCGGTTTTTGACGAACGATTATTTTCGGCAACGTTAGCTAACGGCTTACAAATTAATATTTTGCCTAAAGCGGATTTTCAAAAAACGTACGCCGTTTTTACCACTAACTTGGGGTCGATGGATCGCAATTTTCGAGTTGGGGAACAAAAGCTACAAATTCCAGCCGGAACGGCGCACTTTTTGGAGCATAAACTATTTGAAAAAGCCGACTACGACGCTTTTCAAATTTTTACGCGAAACGGAGCGGATTCGAACGCGTTTACAAGCTATAGCAAGACTAGCTACTTATTTTCAGCAACTAGCCGGCTGAAAGAGAACTTGACGACTTTACTAGATTTTGTGCAGGATCCGTACTTTTCTAGTGCTTCCGTAGCT…	MQIKEKAYSVFDERLFSATLANGLQINILPKADFQKTYAVFTTNLGSMDRNFRVGEQKLQ IPAGTAHFLEHKLFEKADYDAFQIFTRNGADSNAFTSYSKTSYLFSATSRLKENLTTLLD FVQDPYFSSASVAKEQGIIGQEIQMYNDDVDWQLYMGMMRNLFPKQALSEDIAGTSASIA QITPELLYKVHQVFYHPQNMHLFVTGNLDPQTVVDWVEENQRQKQFTEFVQPVNLQKAEQ KILPVVEQSSAVCLANRPKVMLGIRNNRYLLAPGLERLKYLLTLDLGLYLLLSSSSKNYL KLYDEGLLDDTFGYDLNNERDELFLTMGGDSDHPQQLAAALKEILRQGLTDTPELAADFA LAKKEMYGRCIARMNSLEAIANSFEGALYGNAT…
gene0696	Single	+	693977	694840	864	hypothetical protein	-	-	ENOG4111WKE	S	-	-	-	TTGGACGTACAAATGCGGCCTGGAGTTCAGGCTTTAATTGTTCCAAGCAAGAAGTTTAAAACGGTACGGATTGACGTACATTTTTTAAAAAACGCAACGGTAGCGGAGTTAGCTCCTCGAACCCTGGTGGCGAATCTTTTAGAGACGAGCACCCAGCGCTATGTTAACCAAATCCAATTTACGCACGCCCTGTCAGCAATGTACGGGGCGAGTTTTGGCGTGGGGGCAGGTAAAAAAGGCAACCTCCATGACATTGGATTTTCAATTACGGTGGCTAATGATCACTACACGGGCGGTCAGTCCTTAGTGCGGATGGCTATCGAATTCTTAAACGAGGTGATTAGTCACCCGTTGGCTAGTAACGGGCGCTTTGACGAGCAGACGTTTGCCCGTCAAAAG…	MDVQMRPGVQALIVPSKKFKTVRIDVHFLKNATVAELAPRTLVANLLETSTQRYVNQIQF THALSAMYGASFGVGAGKKGNLHDIGFSITVANDHYTGGQSLVRMAIEFLNEVISHPLAS NGRFDEQTFARQKTNLINYVDSATEDKQFWASQQLRKLAFGANRIQGVPSYGRRADLQNL QNEQVYATYLSMLRHDLVHISVSGDVDEQKVLEDLAILELPERKVQLGSVITKFNSLPKP RHRVANQAVQQARLNLAYDIPATVVSDNFHAAVVFNALFGGSPQSKLFLNVREKASLAYY ASSSLDLYNGLLTVQTGIEASNYAQAKQIIQQQIVDLQAGQFTESDLTSIKAGLRSDYLA GLDLQRTIHRRGLNEYLLGFHRPAEQWLNDLDR…
gene0697	Single	+	694894	695205	312	hypothetical protein	-	-	-	-	-	-	-	ATGCTTTTAGCTAGTGTAGTGGGATATTTATTGAACTTATTGTTTGCCTTTGGGATTGCGCTAATGGAAAAACGGGACATTTCAGCCGCGTGGGCCTGGTTACTGGTAATTGTGTTGTTACCGGGAATTGGCTTGATTATTTATTTGTTCTTTGGCTGGAAATTAAGTCAGCGACAAATTTTTAATTTAAAGGCGCAAAAGCATTTGGGAATTAGTGACATGGCGGATCACCAAAAGCAAAGCAGCCAAAATCGGGTTTCGTTGTCTACGACCCTCGAAAATGACTTAGTAACCATGTTTTTAAACACGGACGACGCGATTTTGACCAGTCAAAATGATTTACAAATTTTAACCGACGGCCAGGCTAAGTTTAAAAAACTTTTTCAAGATTTAAGGGGT…	MLLASVVGYLLNLLFAFGIALMEKRDISAAWAWLLVIVLLPGIGLIIYLFFGWKLSQRQI FNLKAQKHLGISDMADHQKQSSQNRVSLSTTLENDLVTMFLNTDDAILTSQNDLQILTDG QAKFKKLFQDLRGAQHHINIEYFTIYDDDLGHQLREILVKKAREGVRVRVLYDLFGSKGA KQKFFRPLIAAGGEVTPFMRSKFGYYSFRINFRNHRKIVVIDGSIGYIGGFNVGDQYLGK NRRFGNWRDTHLRLVGSVVLQLQSRFFMDWNASVTDPKLTFSLNYFPQTALEKKLPMQIV SSGPENDIQKIKQGYIKMIMGAKHSIWIETPYFIPDDALMEALLIALRSGIQVWMVIPKM PDHPFVYRATEYYAKQLLAAGARVFAYQKGFMH…
gene0698	Single	+	695192	695527	336	hypothetical protein	-	-	-	-	-	-	-	ATGAAAAAGTTAGTAAAATTTAGCTTACTCGTGATGGCCTGTGCGCTATTAATTCCAGGATTAGCAGGGTGCGGAAAGACTGCCCAAAATAATCCCCAGCCAAGCAGCTGGAAAAGTATTCAAGCTAAACACCATGTGGTAATTGGCTTGGACGATAGCTTCGTGCCGATGGGCTTTCGTCAAAAAAATGGGAAGCTGGCGGGATACGATATCGATTTAGCCCGCGCCGTTTTTAAGCAATATGGAATTAAGGTCGATTTTCAAACCATCGATTGGTCGATGAACGTTACTGAATTGCGTAACCAAACTGTCGATTTGATTTGGAACGGATTGACGATTACCGATGAACGGCAACGAGCGATGACCTTTAGCGAGCCCTACTTGGTCAACCAACAGGTA…	MKKLVKFSLLVMACALLIPGLAGCGKTAQNNPQPSSWKSIQAKHHVVIGLDDSFVPMGFR QKNGKLAGYDIDLARAVFKQYGIKVDFQTIDWSMNVTELRNQTVDLIWNGLTITDERQRA MTFSEPYLVNQQVLVVKKSQHIHSPQDMNGKTLGVQSGSSGAQDIDRYPKLLKQRIKKHT PVLYDTFNNAFIDLKADRIQGLLIDSVYANYYLQHLPNPGDYRVIKSGMPNEYFAVGIKK GNQEVKQKIDQGIEHLRKTGELQRINQKWFGK
gene0699	Single	+	695520	696668	1149	hypothetical protein	-	-	COG3299	S	-	-	-	ATGCTTGAATTAAAAAATATTTCTAAAAGTTATAACGGACGGACAATTATTGATAATTTAAACCTGCAGATCCAAGATGGCCATATTTTAACGATTGTGGGGCCGTCGGGAGCGGGAAAGACTACTTTGCTAAGGTGTATTAGTGGGCTTGAAAAGATTGATTCGGGTTCATTTCTATTAGATGGTAAGCCGTTTAACCCGTTTGAAACGCGGGACAGTGAGAGCGTCATCGGAGTGGTTTTCCAAGATTTTCAACTATTTCCTAATTTATCGGTAATTGAAAACATTACGTTGGCACCCATGAACGTGTTGCACCTTAGTGAACGAAAAGTTTTACAACGGGTGGAAGAAATTATCGATCGACTAAGCTTAGCTAAAATTATTAATCAATATCCCTAC…	MLELKNISKSYNGRTIIDNLNLQIQDGHILTIVGPSGAGKTTLLRCISGLEKIDSGSFLL DGKPFNPFETRDSESVIGVVFQDFQLFPNLSVIENITLAPMNVLHLSERKVLQRVEEIID RLSLAKIINQYPYQLSGGQKQRVVIARALAMNPRILCYDEPTSALDPELRDEVSRMILDL KQNQITQVIITHDIEFAEKIADETLTVKPVN
gene0700	Single	+	696665	697573	909	hypothetical protein	-	-	ENOG4111YKG	S	-	-	-	ATGTTTAATATTCAATACATTAGCGAAATATTGCCTTCGCTGCTTTCCGGAGCGGCGATGACGTTACAAGTTTTTATTTGGACGATTATCGGTTCTTTAATTTTGGGAGTATTTTTAGCGCTAGGACTGGTTTCGAAATTCAAACCGTTGCAATACATAATTAGCGCGTACGTTTGGCTAATGCGGGGGACTCCGTTATTGTTGCAATTAATTTTTGTCTTTTACGGTCTACCAACCGTAGGAATTGTCTTTCCACGTTACGAAGCGGCGTTGTTTGCCTTTATCCTAAATTACGCAGCGTACTTTGCGGAAATCTTCCGGGGCGGGTTGCAGTCGGTGGATAAGGGACAGTATGAAGCAGGCCGGGTTTTGCAAATGACCTACTGGCAAACAACTAAA…	MFNIQYISEILPSLLSGAAMTLQVFIWTIIGSLILGVFLALGLVSKFKPLQYIISAYVWL MRGTPLLLQLIFVFYGLPTVGIVFPRYEAALFAFILNYAAYFAEIFRGGLQSVDKGQYEA GRVLQMTYWQTTKKVVLPQVAKIVLPSIGNEVINLVKDSSLVYVIGIGDLLRAGNVAAAR DVTLVPFILVGIMYLILTGICTFFLRKVEKHYSYFR
gene0701	Single	+	697584	698222	639	Uncharacterised protein	-	-	ENOG41121JZ	S	-	-	-	ATGTTACAATCGGCAAAACTTAAATATCTTTTTCCAATTATTTTATTTGGGACCTTCTTTTTGGACGGCGCCTTAAACCAAATATTTTCGGCGGTTTTATTTCAATATCCGTACTCGATGATTTGCAACCTAACGCTGATGTGGTTTGTGATGGGAATCTTTTTTGAAGGAGAGTCCCAGATTAATTTTACGTTATGGGCGTTCGTGATTGGAATCGTCTTTGACTGGTACTATACGGGGGTCTTTGGGGTAAATACCTTCATTATCCCGTTAGTGGTCATGTTTGTGCGGGAAGTTCGCTTATACGTCAATACATCGTTTTTGATCGTGATGGTGCTTGATACGCTTGCAATGGCATTGTACAACGTGCTATTCTACGCAGTTTTCCAAGCGATTCAT…	MLQSAKLKYLFPIILFGTFFLDGALNQIFSAVLFQYPYSMICNLTLMWFVMGIFFEGESQ INFTLWAFVIGIVFDWYYTGVFGVNTFIIPLVVMFVREVRLYVNTSFLIVMVLDTLAMAL YNVLFYAVFQAIHLANVPASFFIGYSFFPTIILNLALFVVLYYPIKTFFRRTRGTNYRSF G
gene0702	Single	+	698236	698712	477	hypothetical protein	-	-	-	-	-	-	-	ATGCATAAATTTTTTTCTAATCGAAAGCTAGTGTTAACGGTAATTTGTGCAATTATTGCTGCAGGGTTAATTACGGGATCGTTGGCATTGGGAAAGAAAGATAAGACACCGGCCGTTCAAAAACTGGGAAACGACCTTTTTGGCGCCGTTAGCCGGGTGATCGCCATTCCTGCCCACGGTATGCAGACGTTATCGACTAATTTAAATAACTTTGTTGCAACTTACGAAGAAAATGAACGATTGCGCCAAGACATTGATAAATTAAGCGCGACTCATGCTGAAAACAAGAGCCTCAAGGAAGAAAATCGGGAATTAAAGCAACTAGTGGGGTTGAAGAACTCCATGACGGATTATTCTTTAACCCCAGCAATCGTGCTGACCCGTTCACCAAGTTCGTGG…	MHKFFSNRKLVLTVICAIIAAGLITGSLALGKKDKTPAVQKLGNDLFGAVSRVIAIPAHG MQTLSTNLNNFVATYEENERLRQDIDKLSATHAENKSLKEENRELKQLVGLKNSMTDYSL TPAIVLTRSPSSWQDLVTVNKGTANGVKKNQPVLAGNGLVGRVVEANYSTSKVELISDNN ESANRFAIQVQAKDGNYVNGIITGYDKKTNEIIMGQVTEDKDVAVGSQVITSGLGGVTPK GLYVGKVAKVSKEDYGLANEIRIKPAAKLSNVNDVYIAKLD
gene0703	Single	+	698687	699106	420	hypothetical protein	-	-	-	-	-	-	-	ATGTTATTAAAAGATGGCGCACGTGAAAAACTTACAAAAATTGGCGCAGAAAATTTGACCAACGCGGAATTATTGCGGGCGTTTTTAAGTTGTTGCGGTCAAGAGCAGGCGGTTAACCGGCTATCCCAAGAATTTTGGGATCAGGTGGGCGATATAGTGGGGTATAGTTTATTAACCCAACGAGAACGGCAAACGATTTTTTCGCAATTACCAGCGGAATCGTTAGCTCTAGAAGCCGCAATCGAGTTAGGACGCCGCGTCCAACGACAACCAATCCATCTATTAGGCAAGGTGTTGGGCAGTGCGCAGATTGGGAACTTGATGGTAGCTCGTTTTCAAAAAAATCCGCAAGAACACTTAGTGTTGCTTTGTTTGGACACAAAAAACCAAATTAAACAG…	MLLKDGAREKLTKIGAENLTNAELLRAFLSCCGQEQAVNRLSQEFWDQVGDIVGYSLLTQ RERQTIFSQLPAESLALEAAIELGRRVQRQPIHLLGKVLGSAQIGNLMVARFQKNPQEHL VLLCLDTKNQIKQERVIFKGGLNSAEVHPREIMAEVLRYSSNGFILVHNHPSGNVEPSMN DVAFTKKMKKIGDLMGIRLIDHLIVGDQTYWSAAENRVLNDC
gene0705	Single	+	699783	700133	351	hypothetical protein	-	-	-	-	-	-	-	ATGACCAAAGAAGTTGAGATGTCGACAAAGTACGAACCTCAAAAGGTCGAACAGGGCCGCTACCAAGAGTGGGTCGAAAAGGGTTTATTTAAGCCTAATGGAGATAAAAAAGCAAAACCATATTCAATTGTAATTCCGCCTCCTAACGTTACCGGAAAATTGCATTTAGGTCATGCTTGGGATACTACGTTACAAGATATGTTGATCCGGCAAAAACGGATGCAAGGATATGATACGGTTTGGGTACCAGGAATGGACCATGCCGGAATCGCTACCCAAGCAAAGGTGGAAGCTAAACTGCGTGAACAAGGAGTTTCCCGTTATGATCTTGGACGGGACAAGTTCATTGATAAGGTATGGGAATGGAAAGATGAATATGCCGACACCATCCATCAACAA…	MTKEVEMSTKYEPQKVEQGRYQEWVEKGLFKPNGDKKAKPYSIVIPPPNVTGKLHLGHAW DTTLQDMLIRQKRMQGYDTVWVPGMDHAGIATQAKVEAKLREQGVSRYDLGRDKFIDKVW EWKDEYADTIHQQWAKMGLSLDYGRERFTLDEGLSKAVRKVFVTLYNEGLIYRGEYIINW DPQARTALSDIEVEHQDDQGAFYHVKYFFADPDFTFNGKNYIEIATTRPETMFGDVAIAV HPSDERYQDLVGKEVILPLQGRHLPIIADQYVDPEFGTGMVKITPAHDPNDFQVGNRHNL ERINTMNDDASMNENAGKYEGLDRFEARKAMVKDLEDQGYMIKIDPIVHSVGHSERTGVQ VESRLSTQWFVKMDKLAKMALANQDTDDKVNFI…
gene0706	Single	+	700130	700423	294	hypothetical protein	-	-	-	-	-	-	-	ATGGAAATATTACGTGGTGGACAAAAGGTTGAACTAGTTGGTAACCCGCCAGAAGTGGGCGACCAATTACCAAAGTTTAAAGTCTTTACGGCAAAAGGCGCGAAAGTAAAAACGCGTGATTTACTTGGCAAACCGTTGTTATTAAGCGTGGTGCCTGATTTGAATACGCGAGTTTGCAGCATTCAAACAAAGGCCTTTAACCAGCAGGCGGATAACTATCCGGAAGTTCGGTTTGTCACGATTTCTAATAATTTACCGCAAGATCAAGCAAACTGGTGTGCTGCCGAAGGGGTTAATAACCTAGAAGTTCTTTCAGATCACGAATTGTCGTTTGGTTATGAAATGAAATTATACATTCCGAATGCTGGTTACTTAGCGCGGAGTATTTTCATTGCTGAT…	MEILRGGQKVELVGNPPEVGDQLPKFKVFTAKGAKVKTRDLLGKPLLLSVVPDLNTRVCS IQTKAFNQQADNYPEVRFVTISNNLPQDQANWCAAEGVNNLEVLSDHELSFGYEMKLYIP NAGYLARSIFIADASGKIVYREIVPELHSEPNYEAALEVIKQM
gene0707	Single	+	700441	700917	477	hypothetical protein	-	-	-	-	-	-	-	ATGGAATATACGGAAATTATGGTTCGCTACGGCGAGCTATCTACAAAGGGAAAAAACCGAAAAGATTTTATCGCCCGCTTAGGCGGTAACATTCGTAAAAGTTTAAAAGACTTTGAACAAGTGGTGGTCCACCCTAATCGGGACCGCACCCACGTTACTTTAAACGGGGCGAGCAGTGCGGCAGTAATTGCCCGCTTGAAACGGGTTTTTGGAATTCAAAATTTATCACCAATGTTAAAAGTTGAAAAATCAATGGAAGCTGTTCAAGAAGGCGCGCTAGCAATGATGAAAGAACAGTTAAAGCCCCAAATGACTTTTAAGATTAACACCCGTCGTTCAGATAAGGACTTCCCCATCAATACCGATACGATGAACCGGGAACTAGGCGGATTCATTTTA…	MEYTEIMVRYGELSTKGKNRKDFIARLGGNIRKSLKDFEQVVVHPNRDRTHVTLNGASSA AVIARLKRVFGIQNLSPMLKVEKSMEAVQEGALAMMKEQLKPQMTFKINTRRSDKDFPIN TDTMNRELGGFILENFPESQVKMKNPDITLRVEIRSNGIFLTSEVIDGAGGLPVGTAGKG MMMLSGGIDSPVAAYLGMKRGVEMEMVHFFSPPYTSEQALAKAKELSGKLAAYSGNVQFL QVPFAEIQETIKEKCPEGYLMTIQRRMMLRLTVALAQRRGGLAIFNGESLGQVASQTMES MMAINDVTTMPIIRPVVSMDKNEIIEIAKEIDTYDLSIMPFEDCCTIFAPPAPKTRPDLE KARYYESKIDVEGLMKRALDGVQVTNIHAGEEF…
gene0708	Single	+	700917	701141	225	hypothetical protein	-	-	-	-	-	-	-	GTGATTAAGCGGGATTTTAAGTTAGGGATGAGGAAAATGATTTACTTTGACAATAGTGCAACTACGCAAGTTGATAAAACAGTCTTAGAAACTTACCAAAAGGTTAGCAATCAGATTTGGGGAAACCCCTCTAGTTTACACAACATGGGTGAAACTGCGTTTAATTTGCTTGAACAATCACGTAAACAAATTGCGGACTTGTTAAACGTGCAGCCACACGAGATCTTCTTTACCAGCGGAGGTACGGAAGGCGACAACTGGGTGATTAAGGGAACGGCAATCGAAAAACGTGCTTACGGAAAACACCTGATTACCACTACGGTGGAACATCCGGCGGTCCAAAATACGATGGCTCAATTAGAGCAACTCGGCTTTGACGTTACTTATTTACCCGTAGAT…	MIKRDFKLGMRKMIYFDNSATTQVDKTVLETYQKVSNQIWGNPSSLHNMGETAFNLLEQS RKQIADLLNVQPHEIFFTSGGTEGDNWVIKGTAIEKRAYGKHLITTTVEHPAVQNTMAQL EQLGFDVTYLPVDDEGRISIQDLKDAIRPDTILVSIMAVNNEIGTVQPLTEVAEVLKDYP KIHFHVDAVQGIGKGIQSAIMNDRVDFVTFSGHKFHAPRGVGFIYARQGRRIAPLMTGGG QEKNLRSGTENLPAIAAMAKALRLLLTDEKQKVAHQAQVKQAIYDHVTSFDKVVAFSKCD AGFAPHILCFAIKGVRGETIVHAFESHDIYISTTSACSSKKQQASSTLTAMNVGQQISTS AVRVSLDSANTMEEAERFNKVFDQLYQDFSKIN…
gene0709	Single	+	701255	701530	276	hypothetical protein	-	GO:0016020;GO:0044425	-	-	-	-	-	ATGATCATAGTATTGATTTCAGTCATCGTGGTAGCGATTTTAGTTTACCTCGGGATTGTTGCATATCAACGTTATTTACTAAAACAGGTCGATGAACTGTTAAACCGCAAGGCGGATATTAGCGAATCACCGATCCGCCAGAAGTTAATGGAAGTATCTTCAATGAACTTAACCGGATCGTCTGCGGTCGGCTTAGATAACATCCGCAATGACTACCAAGAAATCATTGATCACCGCTTGCCCGAAGTTGAAGATATCGCTAACCATTCACGTCAAAATATTAATGATATGAAGATATTTGAGGCGCGGAAAGATATTACGACGGTTAGTGAGACTCTCGATGCGATTGAAGAGGAAACCAAGCGTTTGAATGACCAATTGGATAATATCCAACGAATT…	MIIVLISVIVVAILVYLGIVAYQRYLLKQVDELLNRKADISESPIRQKLMEVSSMNLTGS SAVGLDNIRNDYQEIIDHRLPEVEDIANHSRQNINDMKIFEARKDITTVSETLDAIEEET KRLNDQLDNIQRIDQEQRDAVKVLRMKYQEIGKQLLDQNLSLGPSIDLLEEKLSRLNDDF DTFNQTVDAGDHEKAEGQLKKLKASTSEIEAEIKAIPSLYDELTNLFPSQIEEVRDGYDQ LINHNYAFENDTVKDEIKAIKAKINDNLETLSNLRLDAVRANNKAIEIRIDELYDILQTE IDARKSVEHNFNVITRFLDHAEKQNKVLLSEIARLDQSYVLNDDQLNLGQVLEGQLNDIR NEHDRDTERITNQPVVYSEIVERLKEENEQLTE…
gene0710	Single	+	701530	701703	174	hypothetical protein	-	GO:0016020;GO:0044425	-	-	-	-	-	ATGTCCAAGACAATTGCTCCAATTATCATTGACCAAATTGACGCCCTTTTAACTGACGAACCACACCCGATTGCTAACCTAGCTAACGCAGCGGCGTTGTTGTATAGCGAAATTAGCGACCTCAACTGGGCAGGTTTCTACCTATACGATGCTAATGCTGACGAACTCATCTTAGGTCCCTTCCAAGGCAAAGTTGCCTGCATGCATATTCAAAACGGCCGCGGCGTTTGCGGCACCGCTCTAAAACAGCAAAGTACTTTGCGCGTTGCTAACGTTCACGAATTTCCAGGTCACATTGCTTGCGATAGTGCATCTAACTCTGAAATTGTAATTCCTTTAATGGTAGAAAAGCAACCAATAGGCGTTTTAGATATTGATTCACCTAGTTTAAACCGGTTC…	MSKTIAPIIIDQIDALLTDEPHPIANLANAAALLYSEISDLNWAGFYLYDANADELILGP FQGKVACMHIQNGRGVCGTALKQQSTLRVANVHEFPGHIACDSASNSEIVIPLMVEKQPI GVLDIDSPSLNRFSATDEQVLNDFVATLMKHIDKSVLRALN
gene0711	Single	+	701696	702097	402	hypothetical protein	-	GO:0016020	-	-	-	-	-	ATGTCTAGATATACAGGTCCAAGTTGGAAAGTTTCTCGTCGCCTTGGTATTTCATTGTCAGGTACTGGTAAGGAATTGGCTCGCCGTCCTTACGCACCTGGTGACCACGGTCAAAACAACCGTCGTAAGATTTCTGAATACGGTATGCAACTTCGTGAAAAGCAAAAGTTACGGATGATGTACGGTTTAACTGAACGTCAATTCGCAAACCTTTTTGATCGTGCTAGCAAGATGCGCGAAGGTGTTCCAGGTACTAACTTCATGATCTTACTTGAACGTCGTTTGGACAACATGGTTTACCGTTTAGGTTTGGCAACTACTCGTCGTCAAGCTCGTCAATTAGTAAACCACGGCCACATCACTGTGGATGGCAAGCGCGTTGATATTCCATCATACGAA…	MSRYTGPSWKVSRRLGISLSGTGKELARRPYAPGDHGQNNRRKISEYGMQLREKQKLRMM YGLTERQFANLFDRASKMREGVPGTNFMILLERRLDNMVYRLGLATTRRQARQLVNHGHI TVDGKRVDIPSYEVEIGQVIGVREKSKDLKIINEAVEAVVGRPQFVQFDADKLEGSLVRL PERDELEAEIDDSLIVEYYNKL
gene0713	Single	+	703134	703274	141	Maz-like protein	-	GO:0005488	-	-	-	-	-	ATGATCGTTAGCCTGCTGACTTTAATTGCGGGAATTAGTAGCAGTACTCCCCTAATTGTGGCCGGGTTGGTACTTGGAATTGTGTCAACCACGGGCACGCTGCTATTTTTATTAAAATTTTTATAG	MIVSLLTLIAGISSSTPLIVAGLVLGIVSTTGTLLFLLKFL
gene0734	Single	+	723531	724079	549	ABC transporter permease	-	GO:0005215;GO:0003824;GO:0005488;GO:0016020;GO:0044425;GO:0051179	COG1132	V	-	-	-	ATGGCAATATCTGAACAAGATGTTAAGCGGCGAATTGATTCGACTAAGAAAACTAGTCAGATTACGACTGCTATGCAAATGGTTTCAACGGCTAAGTTAAGCCAGATTCAGAAACATACAGTTGGATATCAAGTGTACGCGCAGAAAGTTGAGAGTATTGTTGCTCACCTGGCTAAATCGCATTTAATGAATGCGGGAGTGGCTGGCAAAGCTAGCTCTGATCAGGCTATATCAGCAGCTGATTTATTAGTTCAACGGCCAGTGAAAAAGACCGGATACTTAGTTATTACGTCTGATCGCGGGTTAGTGGGCTCATATAACAGTAGTGTGATTAAGCAAACTAACGATTTCATGAAAGAACACGGTCATGATGGCGGTGATGATGCCATAATTCTTGCG…	MAISEQDVKRRIDSTKKTSQITTAMQMVSTAKLSQIQKHTVGYQVYAQKVESIVAHLAKS HLMNAGVAGKASSDQAISAADLLVQRPVKKTGYLVITSDRGLVGSYNSSVIKQTNDFMKE HGHDGGDDAIILAVGSTGADFYKNRPQKVGYEYRGVSDVPTFNEVREIVTTVTKMYKDGE FDELYVCYNHFVNRLSNSFHVTKLLPIGGEELVNDGKHETITAEYETEPSPEVLLQEILP QYAESLVYGAILDAKTAEHAASSSAMRTASDNASDLIADLELQYNRARQSAITTEITEIT GGQAALE
gene0742	Single	-	731285	731157	129	peptide ABC transporter substrate-binding protein	-	GO:0044464;GO:0005623;GO:0032991;GO:0016020;GO:0044425;GO:0051179	COG0747	E	K02035	peptide/nickel transport system substrate-binding protein	ko02024	ATGGCTTACATCGAAGTACAACACGAATTTAAAATTTATCAAATGGGGGACAATCAAATTGTCGCGAACCGGGACGTGAATTTTACGATTGAGCAAGGGCAGATTGCCGTGATTTTAGGACCGAGCGGGGCGGGAAAATCCACGGTTTTAAATATGCTCGGGGGCATGGACAGCCCGACGAAGGGGAGCATCAACATTGCCGGGACGGACATTGCGCAATTTAACGACCGCCAGTTAACGAAGTATCGGCGTAACGACGTTGGGTTTATTTTTCAATTTTACAATCTAATTCCAAATCTAACGACTACCGAAAACGTAGAACTAGCTACCGCACTGGTCAATGACGGGCTAGATCCGGTAACCGTCCTAAGAGACGTTGGGCTGGCAGAACGTTTGGAT…	MAYIEVQHEFKIYQMGDNQIVANRDVNFTIEQGQIAVILGPSGAGKSTVLNMLGGMDSPT KGSINIAGTDIAQFNDRQLTKYRRNDVGFIFQFYNLIPNLTTTENVELATALVNDGLDPV TVLRDVGLAERLDNFPVQLSGGEQQRLAIARALAKNPKLLLCDEPTGALDYQTGKQILQL LHDASRKFKKTVIIITHNSAIAKMADRVIQINDAQVRSIVDNPQPAPVEEIEW
gene0744	Single	-	733026	732718	309	ABC transporter solute-binding component	-	GO:0044464;GO:0005623;GO:0032991;GO:0016020;GO:0044425;GO:0051179	COG0747	E	K02035	peptide/nickel transport system substrate-binding protein	ko02024	ATGAACTACCAAGAACAGGATCCGCAATTGTGGGCAGCGATTGATCGGGAAGCCGATCGCCAACAACATAATATTGAGTTGATTGCTTCAGAAAACATTGTTTCGGCAGCGGTCCGGGCTGCGCAAGGCAGCGTTTTAACTAATAAGTATGCGGAAGGTTACCCAGGACGCCGTTATTACGGTGGTTGCGAGTACATTGACCAAGTAGAACAATTAGCCATTGATCGGGCTAAAGAACTGTTTGGCGCGGAATATGCCAACGTGCAGCCCCACTCCGGTTCCCAAGCTAACGCAGCCGCGTACGCTGCATTTATCAAACCCGGGGATAAAATCCTGGGAATGGATTTGAACGCGGGCGGTCACTTAACCCACGGTGCCAAGGTTAGTTTCAGCGGCACA…	MNYQEQDPQLWAAIDREADRQQHNIELIASENIVSAAVRAAQGSVLTNKYAEGYPGRRYY GGCEYIDQVEQLAIDRAKELFGAEYANVQPHSGSQANAAAYAAFIKPGDKILGMDLNAGG HLTHGAKVSFSGTFYESVTYGIDPQTERLDYEQIRQIALKERPQMIVAGASAYSRIIDWQ KFREIADEVGAFLMVDMAHIAGLVAVGLHPSPVGIADVVTTTTHKTLRGPRGGMILSQAK YAKQINFAVFPQNQGGPLEHVIAAKAVALGEALRPEFKDYQAQVIKNAQAMAEVFENEPD LHVVTGGTDNHLMTVDLTQTGHNGKEIQDLLDTVYITLNKEAIPDEKLSPFKTSGIRIGT PAVTTRGFNEADSRKVAELIIRAIHHVDEPEVL…
gene0745	Single	-	733379	733053	327	ABC transporter solute-binding component	-	GO:0044464;GO:0005623;GO:0032991;GO:0016020;GO:0044425;GO:0051179	COG0747	E	K02035	peptide/nickel transport system substrate-binding protein	ko02024	ATGAGTGAAATATTTCAAAGTGAAAATTTAGCTGACGCAGCCGCGGCAATTCAGCGCGGGGAATTGGTGGCATTTCCAACCGAAACCGTATACGGCTTAGGAGCGGATGCTACTAACCCAGATGCGGTAAAGAAAGTTTATCAAGCAAAGGGCCGGCCATCAGATAACCCGTTGATTGTTCACGTTACGGGCCCAGCACAGGTAGCCGAGTTTGCCGAAATCGACGCCCAAAGTAAGCAGTTGATGGATACTTTTTGGCCAGGACCGCTCACCATTATTTTGCCGATCAAACCGCACGCATTGGATCCAGTAGTAACTGGAGGCTTGACGACCGCTGCGTTTCGTAACCCAGATACCCCGTTAACCCTTAAGTTAATCGAGCAGGCGGGAGTGCCGTTA…	MSEIFQSENLADAAAAIQRGELVAFPTETVYGLGADATNPDAVKKVYQAKGRPSDNPLIV HVTGPAQVAEFAEIDAQSKQLMDTFWPGPLTIILPIKPHALDPVVTGGLTTAAFRNPDTP LTLKLIEQAGVPLVGPSANTSGKPSPTKPAHVMHDLDGKIAGVLDGGETKIGVESTVLDM SGAVPSVLRPGAVTPEDLTPILGEVQTDHHKVGKDEVPKAPGMKYKHYAPNAQVYIVKDA QWSKVADWVAQHAQQPVGVLATSAIFDSTKLMNFDNVDFISLGEDARTASHHLFDGLRTF DGNPQIKVIFAQAFDPTGIGAAYMNRLQKSAGNTYFDEIN
gene0749	Single	-	737270	736719	552	hypothetical protein	-	GO:0009987;GO:0008152	ENOG4111UMK	K	-	-	-	ATGTCATTTAGAAGTTCAATTGCCAAAATGGCGGGAAAATCATCGTATTGGTTTTTGCATACATTTCGTTCCGGAGGTAGTTCACTCCCTGGTAAAATTACTACCAAAATCGACCCTACAATTTTAAAAGATCTGGGCCAAAACTATGACGTAATCGTCATCACGGGAACTAACGGGAAGACCTTAACAACCGCACTTACGGTAAAGGTTTTACGTCAAAAATACGAGCACGTTTTAACCAACCCCACGGGTTCTAATATGGAGCAAGGGATCGTCACCACTTTTTTGACCGACCACCGTTCTAAAAACGGGAAAAACATTGCCGTTTTAGAAGTTGACGAGGCTAACGTAATTAAGGTCACCCAGTATATTAAACCGATTGCCTTTGTATTTACCAAC…	MSFRSSIAKMAGKSSYWFLHTFRSGGSSLPGKITTKIDPTILKDLGQNYDVIVITGTNGK TLTTALTVKVLRQKYEHVLTNPTGSNMEQGIVTTFLTDHRSKNGKNIAVLEVDEANVIKV TQYIKPIAFVFTNIFRDQMDRYGEIYTTYQKILDGVKLAPEATIIANGDMPIFNSVDLPN PILYYGFNNQADGEMKADPNTDGVVCPRCEHIIHYKFISYSNQGKYYCPHCGWHRPELNF QLTQITKLTPNYSKFFIDASNFTLHIGGLYNVYNALAAYSVGKFMGVPTSQIQKALNDPD ERVFGRQEQINVDGKELTIVLVKNPVGLNQVIDMVGTETEPFSFVGLLNANYADGIDTSW IWDGNFEKLAQMNIQQYITGGERYKDITFRLKV…
gene0750	Single	-	737558	737397	162	hypothetical protein	-	-	-	-	-	-	-	ATGAAATACGAATTAAAAGTCGCCCATTTATATGGTGATTTGCTTAATACCTACGGGGATAACGGCAATTTATTAGCCCTTAACTACTACGCTAAAATGATGGACACTAAGTTAGACATCCAAATCGTTAGCCTTGACGACCAGTTTGTCGCTAAGGATTGGGACATCGTTTTCTTCGGCGGCGGTCAAGATTACGAACAAACTATCGTTTCCCGAGACTTACAAAATAAAAAGGCGGAGCTGACCAGCTATATTGAAGATGGCGGTCCTCTTCTAGCAATCTGTGGAGGCTACCAACTCCTTGGTCACTATTACGTAGGCGCAAACGGTGAAAAAATTAGCGGGATTGGTGCCTTAGATCACTACACATTGAGCCAAGATGATAACCGGTTCATTGGC…	MKYELKVAHLYGDLLNTYGDNGNLLALNYYAKMMDTKLDIQIVSLDDQFVAKDWDIVFFG GGQDYEQTIVSRDLQNKKAELTSYIEDGGPLLAICGGYQLLGHYYVGANGEKISGIGALD HYTLSQDDNRFIGDIVIKNQETGETYHGFENHNGKTYLGKDERPLGKVVTGNGNNGEDES EGVIYKNVYGSYFHGPILTRNGNLAKRILLTALHRRYPDADLSAQEALKIEPTF
gene0751	Single	-	738034	737762	273	hypothetical protein	-	GO:0005488;GO:0009987;GO:0008152;GO:0050789;GO:0065007	ENOG4111UMK	K	-	-	-	ATGAGCGAACCATTATTTTTGAACCCGGTTTTCCATGAGAAAATTTGGGGCGGCGACCATTTGAAGACTAAGTTTGGTTATGATATTCCTAGTGACCACACCGGTGAATGTTGGGCAATTTCTGCCCATCCACACGGACCTGCCGCAATTGCGAACGGTGAATTTAAGGGGATGACCCTCGATCAATTATGGGACCAGCATCGCGAGCAGTTTGGCAATGCCAAGGGCGATGTCTTTCCTTTATTGACTAAAATTTTAGATGCTAACCAAGACTTGTCCGTGCAGGTCCACCCGGACGATGCTTACGCTGCCGAACACGAACATGAATTGGGCAAGACTGAATGCTGGTACATTATTTCAGCTGAACCAGGGGCTGAATTATACTACGGACATAATGCG…	MSEPLFLNPVFHEKIWGGDHLKTKFGYDIPSDHTGECWAISAHPHGPAAIANGEFKGMTL DQLWDQHREQFGNAKGDVFPLLTKILDANQDLSVQVHPDDAYAAEHEHELGKTECWYIIS AEPGAELYYGHNAQTREELADWINHGKWDKLFRKVPVKAGEFYYVPSGTIHALGKGIMVL ETQQSSDTTYRLYDFDRVDKTTGKKRELHLQQSIDVTNVPHHDPQLNITNEQVGDAQVTT FVQPPVSKYFSVKRVELHDGSAEFNREGLYTLVSVLDGEGTLTVDGQDYPIKKGQHFILP NPVKQWRYQGSLELIVSEPGEE
gene0752	Single	+	738219	738473	255	hypothetical protein	-	GO:0016020;GO:0044425	-	-	-	-	-	TTGGAAAGGGACGGGGATAAAATGAGTTTTGAAAAAACACGGGCGTTGATTGCGGAAATGCTTGAGCGACAAGTTATTCCTGGCGTAGACTATACGTTAATTCGGCATGGGAAAATTGAATACGCGGTAACACAAGGAACCGAGGCCGGGATACCAGACGCGCCCCGGCTGGTTGAAGGACGCTATTTTGATTTAGCGTCGCTGACCAAGGTGATTGGGACGGTGCCGCTGATTTTGCGGTTAGCGGCGGAAAAACAATTGGAACTTGATGGATCGGTAAATACATACTTACCAGAAATTAAGGACTCCCGGATTACCATCCGGCACTTATTAACGCACACGTCGGGAGTCACCGCGTGGATTGATCACCGGGATGACTTGTCCGCCAGTCAACTGCGC…	MERDGDKMSFEKTRALIAEMLERQVIPGVDYTLIRHGKIEYAVTQGTEAGIPDAPRLVEG RYFDLASLTKVIGTVPLILRLAAEKQLELDGSVNTYLPEIKDSRITIRHLLTHTSGVTAW IDHRDDLSASQLREAIYAQVSFGTKFNQEIEYNDYNYLLLGFIAEKITHLPVQKAIQQLV LMPWQLTQSTFNPDPFQTVPTGIRDGVLLRGQVHDPKAASLGAHAASAGLFATKADVVKF TQKMLAPQNELFGINQQQDFLNNQTANPALQRSWGWAFVCHNADQVVLRHSGFTGTFILW DRMTQNALVLLSNRLYPEPNLEFLDYRQQIYQTFAAEDKSK
gene0810	Single	+	796504	796863	360	hypothetical protein	-	-	-	-	-	-	-	ATGAAGCAAATCTCGATTGATATTGAAACTTATTCCAGTACTAACCTAAATCAGACCGGTGTCTATCGCTATGCTGACAGCGACGATTTTGAACTATTGCTCTTTGGTTATGCCGTCGATTTGGGCTCAGTCAAAGTGGTGGACTTAACCCAAGGTGAAAAAATTCCCCCACAAATTGTTGAAGCCCTAGATGATCCCAACATTATTAAGAGTGCTTTTAACGCTCAATTTGAACGAGTTTGCCTATCACGCTTTGTGGGACATCACCTAAAGCCGGTTGGCTGGCACTGCTCACGAGTCTGGGCCGCTACCCTTGGTCTACCCTTATCGTTACGCGACGTGGGTACTGTTTTAGGGCTTCCTCGTCAGAAAATTACGGCTGGAAAAGAACTCGTACAC…	MKQISIDIETYSSTNLNQTGVYRYADSDDFELLLFGYAVDLGSVKVVDLTQGEKIPPQIV EALDDPNIIKSAFNAQFERVCLSRFVGHHLKPVGWHCSRVWAATLGLPLSLRDVGTVLGL PRQKITAGKELVHYFCTPCKPTKSNQKRTRNFPYHAPDKWQQFKQYNQRDVEVEMEITQK LEHFPVPKNEWENYWMDQDINDRGIRIDQQLVSNAIKCQEEFHNQYLKMSQQLTGLDNPN SPLQLKDWLNQRGVNTDSLSKASVAQLLQTTTDKVHQVLSLRQLLSKSSVKKYQAMQKSM CQDGRVHGLLQFYGANRTGRWAGRLVQVQNLPRNSMPDLEEARELVKQGSTTVLSMLYDS VPDVLSQLIRTAFIPSQGHHFYVADFSAVEARV…
gene0811	Single	-	798209	797226	984	putative integrase	-	GO:0005488;GO:0044464;GO:0005623;GO:0009987;GO:0008152	COG0582	L	-	-	-	ATGCATTTTACTTTATCGATGGCGGTTAATTCCGGTCAGGCTAGCAACACGATCTATCCTCATCAACAAACTATCACTAACGCACAGGAATTAGAACAGGCTGCCCATTATGACCATGTCTGCGGTCAATTTAAAAATAACCAACGCGCTATTGCCAACTTCATCAAAGCTGACTGCCTGATCATGGACTGCGATAACGATCATTCTGACGATCCGACTACTTGGATCAAGCCTGCAAACATTGCTAACTATTTCGATGATGTTTCCTACGCCATTACTTTCTCGCGAAACAATATGAAGGCCAAGCACCATAAAGCACCCCGGCCTAAGTTTCACGTCTACTTTCCGATTACTGAGATTACGGATGCTAAAACCTATGCTGAACTAAAACACGAAATT…	MHFTLSMAVNSGQASNTIYPHQQTITNAQELEQAAHYDHVCGQFKNNQRAIANFIKADCL IMDCDNDHSDDPTTWIKPANIANYFDDVSYAITFSRNNMKAKHHKAPRPKFHVYFPITEI TDAKTYAELKHEIQEYFPYFDDNALDAARFVFGVSSTKAIWHEGSQTVDKFMMVQRYFAQ QNVGAIHEGQRNATLSHFAGRIIMRLGNTDEARQAFQEEAAKCNPPLSKQELKNIWHSAT KFGQRMASQKGYIPPEEYNQPNDDLQPDDYSDTGESYVFVNNCKERVCYTNQSGFMWFDG KVWQESEPLALGEVQRFTDKQLADAQLRVTQSYQAIQNNGVAKALQTMGKTKASRTFNDE QQAALKNYENAKAYEAFILKERSTRGINGILTN…
gene0812	Single	+	798414	798533	120	hypothetical protein	-	-	-	-	-	-	-	ATGTTAGAAAAACGAATTGAAACTGCTTTTGTCAAAGCTACTCACCAACGTGGGGGCCTTTGCCTGAAGTTCACCTCCCCATCGATGGCCGGAGTACCTGATCGGTTAGTTCTCCTGCCTGATGGCCACATGGGCTTTGTGGAGATGAAGGCTCCTGGTAAGCATCCCCGCCCGTTGCAAGTACAAAGAATCAACCAGTTAAAACAACTTGGTTTCCAAGTCTTTGTTTGCGATCAGCTTGATCAGATTGGAGGAATGCTTGATGCAATACAAACCGCATGA	MLEKRIETAFVKATHQRGGLCLKFTSPSMAGVPDRLVLLPDGHMGFVEMKAPGKHPRPLQ VQRINQLKQLGFQVFVCDQLDQIGGMLDAIQTA
gene0818	Single	+	803467	803691	225	hypothetical protein	-	-	-	-	-	-	-	ATGAACCGAATTAAAGAAGAATTAGCTCAACGCGATCGTATTCGTCAACAAGTTTTGCAAATCCGCAACACTGGCGAAACGAATATGTTTGATGTTGAAAACGTGAAACGACTAGCTTATTACTATAACTGCCATGATCTAATCAAATATTTAAACACTGATCGTGCTGGATACATCAAACTGATTTTGACTGGTAAATTTAACTAA	MNRIKEELAQRDRIRQQVLQIRNTGETNMFDVENVKRLAYYYNCHDLIKYLNTDRAGYIK LILTGKFN
gene0819	Single	+	803973	804221	249	hypothetical protein	-	GO:0005488	ENOG410ZBK7	S	-	-	-	TTGCGTAAATTAAAGGACTATAAACCAACCCGCTTTATGGCCAAAGACTCCACCTACAACAAAGATGCGGCCGACTTTGCGGTATCGTTCATTGAATGCCTTTGTCATACCAAGGGTACCTGGGCAGGCAAGCCTTTTGACTTAATTGACTGGCAAGAAAAAATTATCCGTGATATCTTCGGGATCCTTAAACCGGATGGTTACCGTCAGTTCAATACTGCCTATGTTGAGATTCCCAAGAAACAAGGCAAATCAGAATTAGCTGCAGCAGTCGCTTTATTACTATGCTGTGCTGATGGTGAAGAGCGGGCAGAAGTCTATGGCTGTGCGGCTGACCGGCAACAAGCTGCCATCGTTTTTGACGTGGCCGCCGATATGGTACGCATGAACCCGGCGTTA…	MRKLKDYKPTRFMAKDSTYNKDAADFAVSFIECLCHTKGTWAGKPFDLIDWQEKIIRDIF GILKPDGYRQFNTAYVEIPKKQGKSELAAAVALLLCCADGEERAEVYGCAADRQQAAIVF DVAADMVRMNPALKKRCKILASQKRLIYEPTNSFYQVLSADAYSKHGFNVSGVIFDELHT QPNRKLYDVMTKGSGDARTQPLYFLITTAGNDENSICYQVHQKAIDIMKGRKHDSRFYPV IYGAGRDEDWSSPEVWKKANPSLGITVKMEKVKDAYNSAKENPAEENIFRQLRLNQWVKQ DVRWMPMDKWDACAFPVDPDELRGRDCFGGLDLSSTTDITAFVLVFPPRDESEGYTLLPY FWIPEDNVDLRVRRDHVPYDIWKQQGYLQTTEG…
gene0820	Single	+	804215	804556	342	transcriptional regulator	mazF	GO:0005488	COG2337	T	K07171	mRNA interferase MazF [EC:3.1.-.-]	-	ATGGCAACTGCTACTAAATCCACCACTATCCGTTTTGATAAAGACGTCTTAAATTTGATTCACAAACAAGCGGATCTTGATGGTCAATCTGCTACCGAATTCATGCGAAATGCCGTTTTAGAAAAGCTCGAAGATAGTCTTGACTATCAAGATGCAGTCAAAAACATCCGTGAATCCCATGGCCAAACTGTATCTCGCAATGACGTTAAAAAGCAATTAGGCCTTTAA	MATATKSTTIRFDKDVLNLIHKQADLDGQSATEFMRNAVLEKLEDSLDYQDAVKNIRESH GQTVSRNDVKKQLGL
gene0821	Single	+	804934	805434	501	hypothetical protein	-	GO:0005488;GO:0009987;GO:0008152;GO:0050789;GO:0065007	-	-	-	-	-	ATGATGAAATACACTTGGTCATTTAATCAAAAGGCACTAAAGGATTTTAAGAAAAATCTCGACAAGCCTGTTCAGCGAAGAATCATCAATTGGCTTGACAAACATATCGAAGGTTCTGATAATCCGCGAGTTTGGGGTAAAGCCCTGGAAGGTGAACTGGGTACTCTATGGCGTTACCGAGCTGGTAGTTACCGCATCATTGCCGATATTCAAGACGAAGTTTTTACGGTTGTTGTCGTAAAGGCGGGTAAAAGAAATGACGTCTACAAACGAAAAAGTTAA	MMKYTWSFNQKALKDFKKNLDKPVQRRIINWLDKHIEGSDNPRVWGKALEGELGTLWRYR AGSYRIIADIQDEVFTVVVVKAGKRNDVYKRKS
gene0822	Single	+	805595	806572	978	dehydrogenase	-	GO:0003824;GO:0005488;GO:0008152;GO:0044699	COG0604	C	-	-	-	ATGAACTTTCTCAATAAACTATTCCACACCAACAAAACTTCACCTAAAAACACCTTATCCAGCACGATGTCGTTTCTTTTTGGCAGTTCCATTGCCGGCCAAAACGTCACCGAACGCACTGCTATGCAAAACACCGCAGTTTATGCTTGTGTCCGGGTATTAGCGGAAGGTTTAGCAGAACTGCCACTTCATATTTACCAATACACCAATGATGGTGGTAAACAGCGGGCAATTAAACACCCGCTTTATTTTTTGCTCCATGATGCTCCTAATCCAGAAATGACCAGCTTTGTCTTTCGGGAAACCTTGATGAATCATCTATTACTTTGGGGTAACGCCTATGCCCAGATCATTCGAAATGGTCAGGGACAAATCACTGGACTTTATCCCTTGATGCCC…	MNFLNKLFHTNKTSPKNTLSSTMSFLFGSSIAGQNVTERTAMQNTAVYACVRVLAEGLAE LPLHIYQYTNDGGKQRAIKHPLYFLLHDAPNPEMTSFVFRETLMNHLLLWGNAYAQIIRN GQGQITGLYPLMPDRMDVNRAANGDLYYTYTQNYDDYQAKNKSKQVILLSDEVLHIAGLG FDGLIGYSPIAMAKNAIGLSMAAEQYGSTFFKNDATPGGVLEHPNVVKDPERLRKSWQAQ FSGSNNHSIAVLEEGMTFHQLSIPPDQAQFLDTRKFQLDEIARIFRVPPHMVGDLDRSTF SNIEQQSLEFVKYTLNPWCVRWEQAMNQQLLSPDDQQKYFIKFNVDGLLRGDYESRMNGY AIGRQNGWLSANDIRELEDLNQIPASEGGDQYL…
gene0823	Single	-	806877	806665	213	Mobile element protein	-	GO:0005488;GO:0009987;GO:0008152	COG2801	L	-	-	-	TTGAAACGATTCTGGAACTGGAACCATGACGGTGACCAGCGTCAATTATCTATTTCTGGAGTAATTGCACCTGATAGCTGGGTAAATGACGATATTTCACCGCAAGTATTCCAAGATGAACTAAATGAAGATCAAGGACCAATTGATCTCTGGCTTAACTCTCCTGGTGGTGACTGTACTGCAGCCAGCCGTATTTACACCATGCTGATGAACTACCCTAATGATGTCAACGTCAAAATTGATGGATTAGCTGCTTCAGCCGCTTCAGTCATTGCCATGGCGGGAACTACCGTTTCAATGGCACCGACTGCAATGCTAATGATCCATAATCCCTTGACTATTGTGGGCGGGCAGAAGAAAGACCTCGATCAGGCAGTGCAGATGTTGACCGAAACTAAA…	MKRFWNWNHDGDQRQLSISGVIAPDSWVNDDISPQVFQDELNEDQGPIDLWLNSPGGDCT AASRIYTMLMNYPNDVNVKIDGLAASAASVIAMAGTTVSMAPTAMLMIHNPLTIVGGQKK DLDQAVQMLTETKESIINAYELKTNLPRAKISTMMDNETWMNVNKAIELGFADEMLGQNK NVTDCYSYSDKQSNLVLLNKLKPTTKTTISVKSLQKRLSLLSH
gene0826	Single	+	809690	810022	333	hypothetical protein	-	-	-	-	-	-	-	TTGAAGATTAGTGCGATTGCGATTAATTCTTGCTGGGGTGCAATTGGAGCCTTCCTCGGCTGGTATCTAGGTGGTATGGATGACTTTTTGTATGCCCTCTTAATTTTTATGGTAGTGGATTACCTAACCGGTATTCTTTGTGCCATCAGTGAACATAAGCTCTCGAGTGAAATCGGCTTTCGAGGACTGACACGTAAAGTTTTAATTTTAGTCTTAGTGGGTATTGCCAATGTGCTCGACATTCACTTATTAAAGAATGGCTCGGCAATTAGAACTGCTACCATCTTCTTTTACATTTCCAATGAAGGAATTTCACTTCTTGAAAATGCTAGTCAGCTCGGTTTGCCCATTCCTGATAAATTAAAAAGTGCCCTCCAGCAATTGCATACCAAGAACAAC…	MKISAIAINSCWGAIGAFLGWYLGGMDDFLYALLIFMVVDYLTGILCAISEHKLSSEIGF RGLTRKVLILVLVGIANVLDIHLLKNGSAIRTATIFFYISNEGISLLENASQLGLPIPDK LKSALQQLHTKNNHQ
gene0827	Single	-	810640	810320	321	hypothetical protein	-	-	-	-	-	-	-	ATGACTAAAAAAGTAAAAACCGTAACACACCAACCACTGATATCAGTTAATACCAGTATGACACAATCACAACTATTAGATGAACTTCACTACCAGCAGGCTCGTCAAATAACATTGAAACTCTTGCAAAAAGGGCTAATCTCTAGCCATGAATTCCACCAAATTGATCAATTGCATCGACAGTCCTTTCCTCCTTTAATCGGCCCGGAAGGTGTTGATACATCAACAGTTCAGAGCTAA	MTKKVKTVTHQPLISVNTSMTQSQLLDELHYQQARQITLKLLQKGLISSHEFHQIDQLHR QSFPPLIGPEGVDTSTVQS
gene0828	Single	-	811356	811099	258	hypothetical protein	-	-	-	-	-	-	-	ATGTCAACCATTACTAAAATTCAAGAATTCCAACGTAATGTCCAGCAACTAAGGGTGGCTGCCTACTGTCGAGTCTCAACTGACAATATTGCTCAGCTCGAAAGTCTGGAAAATCAACGTCAACATTACCAAGAATATATTCGACGTCACCTTAACTGGCAGCTAGCTAGAATCTACTATGATGAAGGGCTATCCGGAACCAAAACCCAACAGCGAAAAGCTCTTAATGAGTTATTAGCTGACTGCAATAACCATCGCATTGACCTGGTAATTACTAAGTCAATTAGTCGATTATCACGTAATACTACTGACTGTTTACAGATTGTTCGGCAACTACAGCAACTTAACATTCCTATTTACTTTGAAAAGGAACGGATTAATACCGGTGAAATGGCCAGT…	MSTITKIQEFQRNVQQLRVAAYCRVSTDNIAQLESLENQRQHYQEYIRRHLNWQLARIYY DEGLSGTKTQQRKALNELLADCNNHRIDLVITKSISRLSRNTTDCLQIVRQLQQLNIPIY FEKERINTGEMASELFLSILSSIAQDESHSTAGNLRWSIRKRFADGSFRVSSAPYGYFIQ DGNLMINPHEVRIVKTIFNHFLQGQSTSQIAKQLNIRQIPTQHGHRWWSSTIINILRNIN YTGDMLCQKTYRDDQYRRHINHGELAQYLIEDHHPAIVSHQDFDRAQDLLKHIAQKRHIE VGSHKYQRHYLFTRKLICGYCGTTFKRQTRSNRICWACQKHLHSATQCPVKAISEEGIRN AFCTMMNKLVFSKKFLIQPLLQKLREQINADTD…
gene0829	Single	-	812895	811708	1188	hypothetical protein	-	-	-	-	-	-	-	TTGAGTAAAGTTCATATTATTCCTGCCCATCAGCAACGTGGCAATAGTGTCCACCGTTTACCAGATGAACCACAATCAGAAAAACTACGAGTTGCGGCCTACTGTCGGGTTTCAACTGAACTCGATGAACAAGCTAACTCATATGAAACACAAGTTAGTCACTATAAAGAGCTGATTCAAAAAGATCCCAGCTGGGAAATGGCTGGCATCTTCGCCGATGATGGAATCTCTGGAACCAACACCAAGAAGCGAGAACAGTTCAATAAAATGATTGCCGCTTGTAAAGCTGGTAAGATTGACTTAATTGTCACCAAGTCAATTAGCCGATTTGCTCGAAATACTATTGATTGCCTGAAGTATATCAGAGACTTAAAAGCTATCAATGTTGCAATCTTCTTT…	MSKVHIIPAHQQRGNSVHRLPDEPQSEKLRVAAYCRVSTELDEQANSYETQVSHYKELIQ KDPSWEMAGIFADDGISGTNTKKREQFNKMIAACKAGKIDLIVTKSISRFARNTIDCLKY IRDLKAINVAIFFEKENINTMDAKGEVLITIMASLAQQESESLSQNVKMGIQYRYQQGKV FVNHNHFLGYTKDDQGNLVIEPEEAKVIKRIFYSYLNGMTMKQIADSLKADGILTGGKTK NWRSSGVAKILKNEKYMGDALLQKTYTVDFLNKKRVKNEGIMPQYYVENDHPAIIPKSVF MQVQQLIKQRRNGITTKNGKHRRLNGKYCFSQKVFCGKCGDILQRNMWYRPEKVAVWRCA SRIRRSKTGRRCMIRNVKEPLLKEATVEAFNQL…
gene0830	Single	+	813090	813215	126	hypothetical protein	-	-	-	-	-	-	-	TTGAGTAAATATCATAAGAAAAATGGAGAAACGGATCGAATAATAGAATCAGCACTATTAAAATTAATGGAATCACGTGATTTAAATAAAATCTCGATGAATGAATTAGCTGCCATGGCAAATATTAATCGTGTTACTATTTATCGCCACTTCAATGATAAATGGACAATTATTGAGCAAATCGAAGCTAAGTTTTTTACGGCATTAAAAAAACCACATCAGCAAATGCTCGATCAATTAGCATTAAAATCTGATAATGGTATTGAATATCTAACTAATTTTTTACAGGTCTTCAAAGATAACTTAACAACAATTCGTATTCTGATTTCTAGTCATGGTGACCTAAGTTTCTCAGCCAAGTTAATGAACCATTTATTGAAAATGGAAGGATTGTCGCAT…	MSKYHKKNGETDRIIESALLKLMESRDLNKISMNELAAMANINRVTIYRHFNDKWTIIEQ IEAKFFTALKKPHQQMLDQLALKSDNGIEYLTNFLQVFKDNLTTIRILISSHGDLSFSAK LMNHLLKMEGLSHSLMHLQANKDLQELFSYYSISALMGIIRFWTIHPNYSSKEMATFFFK MRNGELTKLS
gene0831	Single	+	813607	813927	321	hypothetical protein	-	-	-	-	-	-	-	ATGACAGAAATATTTAAAAAACATTGGTCAGAATATAAATATAATAAAAACATGCTGCAAGATGCATTAATCAAGCATGTGATGGATTTGATGCCATATCGTATGAGCGATGAAGGCGAAGTCTTAGAAATTATTATGAACATTAAAGAAAGTGATGAGCAAAGTTGGATTAATGCCTGGAGTAATATGGCAGCAAACTTACAGACTCGTGCGCATAAGTTTGAAAAGGATGGCAAACTAATTAGTGCTGGTAGTAGTTATCTGCGAGCTTCTACTTACTGGCGTGTATCCTTAATGTACTTTGGTGATTGGCAGGATTCTAGAATGCAAGAATATTCCCAAAGGAGTAAAGATTGTTATGATCGTGCTTTAGAGTTAAATGGTTATCCAGGTGAAGCA…	MTEIFKKHWSEYKYNKNMLQDALIKHVMDLMPYRMSDEGEVLEIIMNIKESDEQSWINAW SNMAANLQTRAHKFEKDGKLISAGSSYLRASTYWRVSLMYFGDWQDSRMQEYSQRSKDCY DRALELNGYPGEAIRIPYENTYLPGHFYRSPYAKNKKAPLLIVIPGRDTWADDTIWVTDA AIKRGIHALTFDGPGQGMALRLQDLKFRPDFENVLGPVIDFAQKQEEVDSQQIGAMGMSF GGFLVARGAAFDDRLKFIISDPGNMNWGGMIAGRLEKALKMPAIIRPNMIDFVLKDYEWK HGANNKTIINELKKFDNTKIVQNIKTKTLVLDGSAEVTHGAAKRFYDALTCPKDYLLFDE NSTAQQHTQMGGYATGTEYIMNWIEDNF
gene0833	Single	-	815233	814352	882	Mrr restriction system protein	mrr	GO:0003824;GO:0005488;GO:0009987;GO:0008152;GO:0050896	COG1715	V	K07448	restriction system protein	-	ATGAAAATTAAAGCACCAGTAGAAAAAAACCAAACGTATACGGTCGACATTACCGACTTAACTTATCAAGGAATGGGCGTAGCTAAAATCGAGCATTTTCCAATTTTCATTGCCGACAGTATCCCAGGCGAACAAATTCAAGTCAAAATCACTAAAGTGCAGAAAAATTTTGCGTTTGGCCGGGTGGAAAAGGTTCTAGTGGAAAGCCCAGACCGGGTTGCGGGAAACGATGCTACGTATACGCAAACGGGAATTGCACCGTTGCAACACATTGCGTACCCCGCGCAATTAAAATTTAAGCAAACTCAAATTAAAAACTTATTGCAAAAGTCCCACTTGGAACAAATTGAAGTTGCGGAAACGGTCGGGATGGAAAACCCAACGGGATACCGAAATAAA…	MKIKAPVEKNQTYTVDITDLTYQGMGVAKIEHFPIFIADSIPGEQIQVKITKVQKNFAFG RVEKVLVESPDRVAGNDATYTQTGIAPLQHIAYPAQLKFKQTQIKNLLQKSHLEQIEVAE TVGMENPTGYRNKAQVPVRKVKGQLATGFFKRGSHDLVPIEDFYIQDPVIDQVILQVRDI LREYQIEPYDEINQRGVVRNIMVRRGRRSGEIMVVLITRTSSVPYLDEIAAAIHQIDGVV SVIQNINPKQTNVIMGKEDRLLAGESVIHDELLGQKFIISAHSFYQVNPVQTEKLYQLAI EKAGLTGKETVLDVYSGIGTISLAMAQAAKKVYGVEIVKEAVQDAKVNAVQNQAKNVKFV VGKAEDQMAKWQAEGMQPDVVVVDPPRKGLDES…
gene0941	Single	+	930447	933692	3246	hypothetical protein	-	GO:0005488	COG0827	L	-	-	-	ATGCAAAAAATTTATTTCAATCACGACGGCAACGTTGATGATTTAGTTTCGTTGATTTTATTACTCGCTTTTCCAGATACGGAAATTGTCGGGGTTAGTGCCGTGGGCGCCGACTCTTACGTCGAACCCGCCGTTTCGGCATCGCGCAAAATTATCGATCTATTCGGTTCGCCTAGCCAACTCGAAGTGGCCCAATCCGACTCCCGGCCGGTCAACCAATTTCCTAAGGAATGGCGGCTAAGTGCATTTTCGTTCGATGATTTCCCGATTTTAAATGAACACCTCAATGAGGGTAATCCCCAAACTCGGTTAGCTAAACAGCCGGCGCACCTCGACATGGTCCAAAAACTTCAGCAATCATCTGTGCCAGTCACCCTCGTAATGACTGGTCCATTGACT…	MQKIYFNHDGNVDDLVSLILLLAFPDTEIVGVSAVGADSYVEPAVSASRKIIDLFGSPSQ LEVAQSDSRPVNQFPKEWRLSAFSFDDFPILNEHLNEGNPQTRLAKQPAHLDMVQKLQQS SVPVTLVMTGPLTDLARALAVDPTITAKIDRLFWMGGSMNGIGNVAEPAHDGSAEWNAFW DPEAVQTVFDSDLPITIVSLDSTNQVPLTTALRQRWAKQRRYPALDLIGQGYSLVHSFEA NSTYYLWDVLTTLISKYPELVSSKPLNVKVISKGISAGKTYPDPTGRPVTFVTQVNADAF YDRFDQLAQSLRSNF
gene0944	Single	+	938420	938932	513	hypothetical protein	-	GO:0000988;GO:0001071;GO:0005488;GO:0009987;GO:0008152;GO:0050789;GO:0065007	ENOG410ZNJB	S	-	-	-	ATGGAAAATTTATTTACTCCTAGCGCACGCAACGTGTTAATTATTGCTCAAGAGCAAGCCAAACGGTTTAAACATCCCGCGGTGGGAACGGAGCATTTACTATTAGCACTAACGATTGAAAACAACGGCGTTGCCCACAGTGTGTTAGAACAATTTAATGTCACCGAAATTGATGTAATTGAAGAAATTGAGCAGTTTACGGGTTACGGCAACTTACGCTTAACCAAAAATGATTACTTGCCATATTCGCCAAAGGCTAAAGAGATTTTAGCGAATGCGGGAGACCAAGCGCGGCAATTAAAAGCTGCTAAGATTGGTACAGAACACATTCTATTAGCGCTGATTCAAGATGAGACCATCTTATCTTCGCGAGTTCTGTTAGCGTTGGATACTGACGTT…	MENLFTPSARNVLIIAQEQAKRFKHPAVGTEHLLLALTIENNGVAHSVLEQFNVTEIDVI EEIEQFTGYGNLRLTKNDYLPYSPKAKEILANAGDQARQLKAAKIGTEHILLALIQDETI LSSRVLLALDTDVADVRKVTLRKLGVNPATQSRRAKQRATTTKGTPTLDSVARDLTAMAE AGKIDPMIGRENELRRVIQILSRRTKNNPVLIGEPGVGKTAIAEGLAQRIIADDVPEDMK NKRLMMLEMGALVAGTKYRGEFEDRLKKVIEEIRQDGKVILFIDELHTLIGAGGAEGAID ASNILKPALARGELQTIGATTLNEYQKYIEADAALERRFAKVEVDEPTQAEAVQILQGIR PKYEEHHKVRITDEAIQQAVNLSARYISDRFLP…
gene0945	Single	-	939925	939404	522	hypothetical protein	-	-	ENOG410YE5P	S	-	-	-	ATGCAAGGACAGAATATTTCGGATATAATCGAGCGATACTTGAAAGAAATTTTAGCTGATTCGGAGGAAGTTGAGATTCGGCGTTCTGAAATTGCGGATCAGTTTGACGTAGTACCATCCCAAATTAACTACGTAATTAAAACCCGGTTTACCATCCAAAACGGTTATTTAGTTGAAAGTAAGCGCGGCGGCGGTGGCTATATCCGGATTGAAAAAGTTAAATTGCTAGATGATATTGACGTATTAGATTCGTTGATCCGGGTGATTGGCGATTCAATTAATGAACGAGACGCAATTTCTATTTTAAGCAGTTTATATGAAGATGCGGTTTTAAGTAAGCGGGAAGCTAATCTACTAGCTGCAACAATTGCCAAGAGTACCTTAAACATTGGCGATCGG…	MQGQNISDIIERYLKEILADSEEVEIRRSEIADQFDVVPSQINYVIKTRFTIQNGYLVES KRGGGGYIRIEKVKLLDDIDVLDSLIRVIGDSINERDAISILSSLYEDAVLSKREANLLA ATIAKSTLNIGDRKLEDQIRAKIIIGVLNHLRYE
gene0946	Single	+	939917	940288	372	sigma-70, region 4	rpoE	GO:0000988;GO:0001071;GO:0005488;GO:0016020;GO:0044425;GO:0009987;GO:0008152;GO:0050789;GO:0065007	ENOG4111G17	S	K03088	RNA polymerase sigma-70 factor, ECF subfamily	-	ATGAGTGAAAAGACTGTACCAGCAAGTGTCGCAATGTTAAGAGTCCTTCAGGCTTGGGATATTAAACGTGTTTTTGGATATCCAGGTGGTTCGTTTAATTCAACAATGAACGCTTTAGACCTAGAAAAGGATCGAATCCAATATGTGCAAGTTCGCCATGAACAAGTTGGCGCCCTCGCTGCCGCTGCTGAAGCAAAGCTAACCGGCAAGATTGGAGTTGCCTTTGGTTCAGCAGGTCCCGGTGCGGTTAACATGTTGAATGGTTTATATGACGCTAAGGAAGACCATACCCCCGTGTTGGCACTAGTTGGGCAAGTACCTCATAGCAACATGAATTACGATTTCTTCCAGGAATTTCCTGAAGTTCCAATGTTCCAGGACGTGGCCGTTTATGACCGC…	MSEKTVPASVAMLRVLQAWDIKRVFGYPGGSFNSTMNALDLEKDRIQYVQVRHEQVGALA AAAEAKLTGKIGVAFGSAGPGAVNMLNGLYDAKEDHTPVLALVGQVPHSNMNYDFFQEFP EVPMFQDVAVYDRCVMTPESLPYVVDKAIRAAYKNRGPAVVVIPNDFGYVQIPDVNYAST ALLEKQTPKQTPTDEEVDQFLKMVREAKRPVFHVGSGIKDHQDLLKKVAEKLQIPVTITG LAKGKVDDDWEGNLGTTNRAASKAADEAFATADLVIALGTDFPFANLVYRTHDFKFVQID NDESQFGRHHFLDLGIWADSGKFLEKVLERSEAVENRPFYQATVADMQDWKAYLNKLMKK ADGPLSYEQIYREINRIADKDAVFGIDTGDNII…
gene0947	Single	+	940372	941208	837	Uncharacterised protein	-	-	ENOG410ZP7K	S	-	-	-	ATGAAAAAGACCAAGATCGTAAGTACCCTTGGACCAGCTAGTTCTGACCTAGATACAATTGTTAAGTTAATCGAAGCAGGTGCAAATGTTTTCCGTTTTAATTTCTCACACGGTGATCATGAAGAACACTTAGGCCGCATGAATTTAGTTCATGAAGCTGAAAAAATTACTGGTAAAACAGTAGGTTTCTTATTAGATACAAAGGGTGCAGAAATCCGTACAACTGTTCAAAAAGAAGGCAAGATTCATTTTGCAATCGGTGATGAAGTACGTATTTCTATGGACGATTCTATTGAAGGTACAAAAGAAAAAATCGCTGTAACATACCCTGGTTTATACGATGACGTTCACGAAGGTGGACATGTATTGTTTGACGACGGTTTGATTGATATGCAAATC…	MKKTKIVSTLGPASSDLDTIVKLIEAGANVFRFNFSHGDHEEHLGRMNLVHEAEKITGKT VGFLLDTKGAEIRTTVQKEGKIHFAIGDEVRISMDDSIEGTKEKIAVTYPGLYDDVHEGG HVLFDDGLIDMQIEKKDDANKELVCKVLNEGTLGSRKGVNAPGVSINLPGITEKDSDDIR FGLDQDINYIAASFVRKPQDILDIRELLEEKHMEHVQIFPKIESQEGINNFDEILKVSDG LMIARGDMGVEIPAENVPLVQKSLIKKCNLAGKPVITATQMLDSMQENPRPTRAEASDVA NAVFDGTDATMLSGESANGDYPVESVATMARIDIKSENALRQHKALTLDAFDKTDVTEAI GRSVAETAENLNIKTIVAATKSGHTARMISKYR…
gene0952	Single	+	946073	946297	225	hypothetical protein	-	-	ENOG410ZSYM	S	-	-	-	GTGAAAGACAAGAGTCAAATTCGTGTCGTTGTGGGAATGAGTGGTGGAGTTGATTCTTCAGTTTCTGCTTACTTATTGAAACAACAAGGATATGACGTTGTTGGTGTATTTATGAAGAACTGGGATGATAAGAATGATAGTGGTGTCTGTACAGTAACAGAAGACTATCAAGACGTAGCTAAAGTTGCTAGTCAAATTGGTATTCCTTATTACTCAGTTAACTTTGAAAAGGAATATTGGGATAGAGTATTCACATATTTCCTTGATGAATATAAAAATGGACGTACTCCAAATCCTGATATTATGTGTAATAAAGAAGTTAAGTTTAAAGCTTTCTTAGATTACGCAATGTCTATTGATGCAGATTATATTGCAATGGGACACTATGCACAATTGCGT…	MKDKSQIRVVVGMSGGVDSSVSAYLLKQQGYDVVGVFMKNWDDKNDSGVCTVTEDYQDVA KVASQIGIPYYSVNFEKEYWDRVFTYFLDEYKNGRTPNPDIMCNKEVKFKAFLDYAMSID ADYIAMGHYAQLRRDEDGKVHLLRGADDNKDQTYFLSQLSQEQLQKVMFPIGHLQKSEVR RIAEEAGLATAKKKDSTGICFIGERNFSKFLGEFLPAQPGEMVTLDGEVKGNHFGLMNYT IGQRKGLGIGGDGKSNEPWFVIGKDLKTNTLLVGQGYHNEHLYANSLDASKLSFVDDISD RGDEFHCTAKFRYRQKDTGVTVKFNEDRTKVEVIFDEPVRAITPGQEVVFYDGEECLGSG TIDHAYKESKLLQYV
gene0994	Single	-	988403	988257	147	hypothetical protein	-	-	COG0698	G	-	-	-	ATGAGTTATCAAGCATTGTACCGCGTTTGGCGGCCGCAGAAGTTTGCCGACATGGTTGGTCAAGAAGTGGTTACCAGAACTTTGAAAAATGCGTTAATAACTAAGCAGACTAGTCATGCGTATCTGTTTACGGGTCCCCGGGGGACGGGGAAGACCTCGGCAGCTAAGATTTTTGCTAAGGCGGTTAACTGTCATTACTTAAAAGATGGCGAACCGTGTAATGAATGTGCGACTTGTCGGGCAATCACGGACGGTAATTTAAATGACGTGATTGAAATTGACGCGGCCTCGAACAACGGGGTCGAAGAAATCCGTGATATCCGGGATAAGGCCAAGTATGCGCCCACGGAAGCAGACTATAAGGTTTACATCATCGACGAAGTGCACATGCTATCCACG…	MSYQALYRVWRPQKFADMVGQEVVTRTLKNALITKQTSHAYLFTGPRGTGKTSAAKIFAK AVNCHYLKDGEPCNECATCRAITDGNLNDVIEIDAASNNGVEEIRDIRDKAKYAPTEADY KVYIIDEVHMLSTGAFNALLKTLEEPPTNVIFILATTEPQKIPLTIISRTQRFDFKRITP TQSYDRMVYILEQKGIEYDPKALSIIAKAAEGGMRDALSILDQVISFGNETVTMDNALLV TGSVNQQLLDQYLTQIFEKDTPAALETLHQILDEGKDGQRLIEDLIAVERNLLLYQEDPQ LVKEQSLSDLSEDFVKEADMVSGSELYEMIDTLNQIQQQMRFTTHPDVYLEVLTIKLSQR SATPTSATADNEEVQQLKNEVDRLQGEVNRLKE…
gene1000	Single	+	992908	993153	246	multidrug ABC transporter ATPase/permease	-	GO:0005215;GO:0003824;GO:0005488;GO:0016020;GO:0044425;GO:0051179	COG1132	V	-	-	-	ATGGCATTAGATAAAGACCAATTTATTGAAGACTTAAAAGGTGCTTCAATTTCTGACTTAAACGATCTTGTTAAAGCAATCGAAGACGAATTCGGTGTTTCAGCTGCTGCTCCAGTTGCTGCTGCAGGTGCTGCTGGCGGTGCTGCAGAAGCTAAGACATCATTCAACGTTGAACTTACTGGCGCTGGCTCAGCTAAGATCAAGGTTATCAAGGCAGTTCGTGAAATCACAGGCGCTGGCTTGAAGGACGCTAAGGACATGGTTGATAACGCTCCTACAGTTATCAAGGAAGACCTTTCCGAAGACGAAGCAAACGACATGAAGGCTAAGCTTGAAGAAGCTGGTGCTACAGTAGAAGTTAAATAA	MALDKDQFIEDLKGASISDLNDLVKAIEDEFGVSAAAPVAAAGAAGGAAEAKTSFNVELT GAGSAKIKVIKAVREITGAGLKDAKDMVDNAPTVIKEDLSEDEANDMKAKLEEAGATVEV K
gene1007	Single	+	1000329	1000445	117	hypothetical protein	-	-	-	-	-	-	-	GTGCAACAAGTTGATTTAGACGAAGCCAAAATTATTGCGGAGGTCAAGGCAGATGACACGCACAATTTTGAACGATTGTTTAACAAGTACCATCCGATTATCAAAAAGATGCGCCAAAAGTACACCATCCGAAGTTTCGATTGGGATGATTGGATGCAAGAAGGCCGGATCGTCTTTTTTAACTCGGTGGTTAATTACGATGCGGATTTAAAAATTACGCTGGGAGCTTTTTTCAAAAATAATTTCCGCAACCGCATTTTTAGCATTTTACGTTTTGAAATGGCATATAAACGAAAGGCAGGCTTTGCCGCGCAGTCGTTAGAAGAGTTGGAAGAAGAAGCCGAGGTCTTAGGACAACAGGTTTCCCGGATTACTCCGCAGAACCAGTTGATGGTTAAA…	MQQVDLDEAKIIAEVKADDTHNFERLFNKYHPIIKKMRQKYTIRSFDWDDWMQEGRIVFF NSVVNYDADLKITLGAFFKNNFRNRIFSILRFEMAYKRKAGFAAQSLEELEEEAEVLGQQ VSRITPQNQLMVKETYAEYETLLSPFEKEVSVLLFQGLRPDQIADRLGYDVTKIQNALLR CKQKLSRQLYEHR
gene1034	Single	-	1018911	1018576	336	MFS transporter	-	GO:0016020;GO:0044425;GO:0051179	ENOG4112APV	G	-	-	-	TTGGAAGCAGAGATTTTAGCTTTAGTGGAAAAACAATTAACCGCTTACCGACCGCAACAAATTCGCGCGACGTTGGAGATGCTCGATGAGGGAAATACGGTGCCGTTTATTGCACGCTATCGTAAGGAACGCACCCATAGTCTTGACGAAGTACAAATTCGCGAAATCCAGGCGGCGTACCACCAAACGGAAACGTTAGAAAAGCGGAAGACGGAAGTTTTAAAGCAGATTGAAGAACAAGGCAAATTAACTACTGGATTAAAACAGCAAATCAAGCAGGCAACCACCTTAACTGCGGTGGAAGATTTATATTTGCCGTACAAGCAAAAGCGGCGCACAAAAGCGACGATTGCCAAAGAAGCGGGACTAGAACCGTTAGCGGCGTGGGTTTTAACTTTC…	MEAEILALVEKQLTAYRPQQIRATLEMLDEGNTVPFIARYRKERTHSLDEVQIREIQAAY HQTETLEKRKTEVLKQIEEQGKLTTGLKQQIKQATTLTAVEDLYLPYKQKRRTKATIAKE AGLEPLAAWVLTFPQQGLRERLAAAVNPEAKLNTIEDVESGVHEILAEAFGEQAEIRAWI RKYTQHNGALVSEVKRQGKELDENGVYAIYYDFQAPLAQLAAHQVLAINRGEKEKVLRAK VAVEEAGIERYLNFRLVQKHRGPAVALVQAAYRDAYKRFIGPAIEREMRAELTSMAEQRA IKVFGENLYHLLMQAPLKGKVVLGFDPAYRTGCKLAVIDENGKFLDKLVIYPHRPAPQAK RAAAAKQLKDFIEKYHVEMIAIGNGTASRESEE…
gene1075	Single	-	1073189	1071969	1221	site-specific integrase	-	-	COG0582	L	-	-	-	TTGAAATTTACCGAACTAGGGTTGGAAGAAGACATTTTGAAAGCTGTTTTAGACAATGGATACGATGAACCCACTCCAATCCAAGCTGAAACAATTCCCGATGTCTTAGCGGGGAAAGATATTATTGGACAGGCACAAACCGGAACCGGAAAAACGGCTGCGTTTGGATTGCCAATCTTACAAAATGTTGACCTAGATAATCCTAATATTCAAGCAATTATCGTTTCACCAACGCGTGAATTAGCTGCCCAAACCCAAGCAGAAATCTTTAAATTGGGTAAGTACAAGCGAGCTAAAGTTCAAGTTGTGTATGGTGGAGCAGACATTCGCCGGCAAATCAATGCGTTGAAGAGCCACCCACAAATTGTTGTGGGGACTCCCGGCCGACTTTTAGATCAC…	MKFTELGLEEDILKAVLDNGYDEPTPIQAETIPDVLAGKDIIGQAQTGTGKTAAFGLPIL QNVDLDNPNIQAIIVSPTRELAAQTQAEIFKLGKYKRAKVQVVYGGADIRRQINALKSHP QIVVGTPGRLLDHIGRHTIRLDHVKTLVLDEADDMLDMGFLPDIEKIIEQTPSERQTLLF SATMPAPIKKIGVKFMTDPKQVTVKSKELTADLVDQYYIRSKEFEKFDMLTRIIDVQSPK LAVVFGRTKRRVDEVAKGLVARGYNAAGIHGDLTQQRRMNILHQFRDGQLDILVATDVAA RGLDISGVTHVYNYDIPQDPESYVHRIGRTGRAGAHGTSVTFVTNWEMDYLRDVERLTKK RLLPLKPPTEEEAFIGRAAMAEQNVQELVKKTD…
gene1077	Single	-	1075315	1074584	732	hypothetical protein	-	-	ENOG410XU6J	S	-	-	-	TTGGTTACTAAGGCAACGGGTTCAAAAAAGCCCAGTAAATTTTACCAACCAATTCAATCTAGAAACATGCCGTCAAAATTAGCTTTGGTTAACAAAAACTGGACTTTCATCTCATTAGCTACTATATAA	MVTKATGSKKPSKFYQPIQSRNMPSKLALVNKNWTFISLATI
gene1078	Single	-	1075890	1075330	561	hypothetical protein	-	-	-	-	-	-	-	ATGTTGCGTGACGACTATATTTTTGTACATTTAGAATCAATTGTTAACTTAATTTATTCGCGCGGAATTACTGCCAAGGATTTCTTAAGTGGAATTTTGCAGGTGCCGACCAATATTTTACTTTTAAACCGGGAAGTTAGTGACGACGTTCCAATCGATAACCATACTTTTTTAAACGAGATTAACGATGCCAAGACGATTAGTCAGTATTTGCTTGATCCGCACAGCAGTAAAAATTGGATCGATTTTTCTCAAGCAGAGGCACTTAGTGAATTAACGCCCAATGACATCGCTAATTTACTGTACATGGGACATATGAAGAGTCATTTGGATACTCCCTTTTCGTACAAACTGCAAAACGACTACGTTTACTTAGAGGTGGGGACTAACCAAGTCAAA…	MLRDDYIFVHLESIVNLIYSRGITAKDFLSGILQVPTNILLLNREVSDDVPIDNHTFLNE INDAKTISQYLLDPHSSKNWIDFSQAEALSELTPNDIANLLYMGHMKSHLDTPFSYKLQN DYVYLEVGTNQVKTYYRRLKNFYAVLNQSVIRHAEQTYNEHRLVFRRVNHFSELPASMVR QLIPVLGEGVIFAFDQAIEQDHELRVPILIASDSNLAPTLRSKESLYNQAQQIAVLKYNL RNQDWHFIITNPKAFDAEALY
gene1079	Single	-	1076545	1075937	609	XRE family transcriptional regulator	-	GO:0005488	COG1974	K	-	-	-	ATGCTATATCAACAAATTGCAAGTAACAAACGCAAGACCGTATACGTAATGGTTGGTTTTGCGATTTTGGTTCTCCTAATTGGAGCATCGGTCGGTTACGTGTTTTACAATAGCGCTAGTGCGGGAGTTGTAATGGCGGCGATTATTGCTGCGGTTTACATGGGATTAATGATTAGTAATTCGACAAACGTGGTAATGCGAATGAACCACGCGACCGAAATTAGCGAAGCTGACCATCCCGAGCTATGGCATATCGTAGAAGATATGGCACTAGTAGGAAAGGTTCCGATGCCTAAGGTGTACATTGTAGACGATCCTAGCCCGAATGCCTTTGCTACCGGGAATAACCCGCAAAATGCCGCGGTAGCGGTAACCACCGGAATTTTGGCGCGTTTAAAT…	MLYQQIASNKRKTVYVMVGFAILVLLIGASVGYVFYNSASAGVVMAAIIAAVYMGLMISN STNVVMRMNHATEISEADHPELWHIVEDMALVGKVPMPKVYIVDDPSPNAFATGNNPQNA AVAVTTGILARLNREEMEGVIGHEISHIRNYDIRLSTIALALSAAVSLLVNWGMHAFWWG GGRRRDSDDDEDSSLRAILMLLALVLVILGPIATSIAQLALSRNREYLADASSVELTRNP LGLINALKKISASEPMQEADPSSAALYIADPFKKKRSLAHLFDTHPPIEDRIARLEKM
gene1080	Single	+	1076699	1076926	228	transcriptional regulator	-	GO:0005488	-	-	-	-	-	ATGAGTGGAATGGTCATTGGGATTATCATTGTTGCAATCTTGGTTGTGGCAATTGTGTTGATGTATAACGGTTTAGTAAAGGCGCGGACTTATACGCAAGAATCTTGGAGTCAAATTAACGTTCAGCTAAAACGGCGGAATGACTTAATTCCTAATTTAGTAAACACGGTTAAGGGATACGCAACCCACGAAAAGGAAACCTTAAGTAAGGTAGTGGAATTACGTAACCAGTTGGTTGACCAAACGAAGGTGGCGGACCCGTCAACTGCCCAACGGCAAGCGGCAATGCAAACTTCTAACCAGTTGAGTGATACTTTAAAAAGTATTTTTGCGCTTTCAGAAAATTATCCAGATTTGAAAGCTAACCAGGAATTTAACAAGTTAATGGAAGAATTGACC…	MSGMVIGIIIVAILVVAIVLMYNGLVKARTYTQESWSQINVQLKRRNDLIPNLVNTVKGY ATHEKETLSKVVELRNQLVDQTKVADPSTAQRQAAMQTSNQLSDTLKSIFALSENYPDLK ANQEFNKLMEELTNTENKIAYSRQLYNSSVASYNIKLQSFPSNLVAGIGGFKAVDYLQVP EEETAAPKVSFDK
gene1082	Single	+	1077730	1078086	357	hypothetical protein	-	-	-	-	-	-	-	ATGATCTTACGAGCTTCCCTCGGAATGGCGTTTGTTTTAGGCGCGATGGGATTAGTCCAAAATGTCTACCAACTAATCGGCCTCCGTTTGTTACAAGGGGTCTTTGCTGGTTACATTAGTAACGCAAACGCCTTAATTGCTACGGAAACTCCGAAAGAAAAAAGCGGGTACGCCCTCGGTTTCCTATCAACCGGTCCTGTATCCGGCTCCCTTTTAGGTCCCCTCGTCGGTGGAGCCCTCGCTTCCATCTTCTCTTATCGTATCACCTTTTTCATCACTGGAGCACTATTATTAATCGTGTTCTTCCTTAGTTTATTCTTAGTTCACGAACACTTTGTTCCAATCGAAAGCACGGAAGGTTCGTTAACTGCTAAAGACGTGGTACATAAGTTGAACCGA…	MILRASLGMAFVLGAMGLVQNVYQLIGLRLLQGVFAGYISNANALIATETPKEKSGYALG FLSTGPVSGSLLGPLVGGALASIFSYRITFFITGALLLIVFFLSLFLVHEHFVPIESTEG SLTAKDVVHKLNRPQAVFGMFITTMIIQASNNSIAPIISLYVKELMHNGAGVTMVAGLIA AIPGIANMLAAPRLGELGDRIGTEKILSVAFLFAMVLYVPMAFVPSVFWLGVFRFFIGIS DGAMLPAVQSILSKRTPPEVTGRIFSWNQSFQALGNMIGPLLGSAVSGLFDYNAVFIATS VLVLINFLLFRWLNGRSVA
gene1083	Single	+	1078328	1078483	156	hypothetical protein	-	-	-	-	-	-	-	ATGAAAAAAGGAATTCATCCAGATTACCATCCAGTTGTATTCCAAGATTCAGCAACTGGGTTCAAATTTTTATCAGGTTCAACTGCATCATCTTCTGAAACAATCAAGTGGGAAGATGGTAACGAATACCCATTAATCCGGGTTGAAATTACTTCAGATTCTCACCCATTCTACACTGGCCGTCAAAAGTTCCAACAAGCCGACGGTACGGTTGCGAAGTTCAACAAGAAATACGGTTTGGCTTAA	MKKGIHPDYHPVVFQDSATGFKFLSGSTASSSETIKWEDGNEYPLIRVEITSDSHPFYTG RQKFQQADGTVAKFNKKYGLA
gene1084	Single	+	1078495	1078653	159	hypothetical protein	-	-	-	-	-	-	-	ATGGATAAATTTTTAACGATGAATGATTTACAAGAAATGACTCTCAAAGAAATTTACAACCTTGCGCGTGAATACAAGATTTCATACTACAGCCAGATGAACAAGAAGGAATTGTCACTGGCTGTTTTGCGTGCTCAGGCCAAAAAGCAGTCATTTGTTGAAATGGAAGGAGTCCTCGACATAATCGGCAACGAAGGCTACGGTTTTCTGCGTCCGATTAATTACGGCTCTTCCCAAGAAGATATTTATATTTCAGCTTCCCAGATCACCCGGTTTGGTTTGCGAAACGGAGATTTAGTGGGCGGCGAAGCGCGGCATCCGCGGCCAGGCGAACGTTATTACGGATTGATGCGGGTAACTTCGGTGAATAATAAGGATCCTGAAGAAGCTAAACAACGG…	MDKFLTMNDLQEMTLKEIYNLAREYKISYYSQMNKKELSLAVLRAQAKKQSFVEMEGVLD IIGNEGYGFLRPINYGSSQEDIYISASQITRFGLRNGDLVGGEARHPRPGERYYGLMRVT SVNNKDPEEAKQRPHFPALTPIYPNQQLTLATTPDVLSTRLVDLFAPIGFGQRGLVVAPP KAGKTTLLKAIANGISKNHPNAKLIVLLIDERPEEVTDLERSIDGEVVYSTFDQEPRNHT RVSELVLQRAMRLVEDKQDVVILLDSITRLTRAYNLVTAPSGRTLSGGVDPASFYKPKKF FGAARNIEEGGSLTIIGTALVDTGSRMDDVIYEEFKGTGNSELVLSRNLAERRVFPALDI RQSGTRKEELMISRDVLEQLWNIRRSMRGDALE…
gene1089	Single	+	1081884	1082075	192	hypothetical protein	-	-	-	-	-	-	-	ATGGCCCTTAAAAATCAGCGCCTGCCGATGGAAAAAGTTTTTCGTGATCCCATCCATGATTACGTTTACGTCCAAGACCAAGTAATTTTGGATCTGATTAACACGAAAGAATTCCAACGGCTTCGCCGCATTCATCAGTTAGGAACTACTTCATTCGTTTTTCACGGCGCGGAACACACCCGTTTTTCACATTCTTTGGGTTGTTACGAAGTAGCCCGGCGCATTGTTGAAAACTTTGAACGGAATTACCTTTCCAAAAACCCTAACGATGGATTATGGCGTAAAGAGGAACGTTTGGTAACCCTTTGCGCAGCGTTATTACACGACATTGGTCACGGTGCTTATTCACACACGTTTGAGCACATTTTTCACACCAATCACGAACAAATTACTACCCAA…	MALKNQRLPMEKVFRDPIHDYVYVQDQVILDLINTKEFQRLRRIHQLGTTSFVFHGAEHT RFSHSLGCYEVARRIVENFERNYLSKNPNDGLWRKEERLVTLCAALLHDIGHGAYSHTFE HIFHTNHEQITTQIITDPTTEVNQVLRQISPDFPTQVAAVISHDYPNPQVVQLISSQIDA DRMDYLLRDSYYTGTNYGTFDLTRILRVMRPYSKGIAFQISGIHAVEDFIVSRFQMYVQV YFHSVSRSMEVILGHLLARAHQLYLDSATPWQQAPQFLMPFFNKQFTLSDYLKLDDGVLN TYFLQWEDSEDPILNDLANRFLNRTPFKSARISNQTRALLPELKQLVAAAGFDAEYYTAE NDSYDLPYDAYDPTSQKPRTQIELMQADGSLVE…
gene1090	Single	+	1082168	1082473	306	hypothetical protein	-	-	-	-	-	-	-	ATGAGTATTAAATTAGTGGCCATTGATTTAGATGGCACCCTATTAAACGATAATAAACAACTGACCGAAGAAAACATCGCTGCCATTAATGCAGCTTCTAAGATGGGCGTTAACATTGTTTTGTGTACCGGACGCCCCATCACCGGGATTCAACGCTACTTAGCCCAACTCGAACTCCAAAACGAAAAGGAATACGCCATTACTTATAACGGCGGGCTTGCTCAGACCATTAACGGGGAAATTTTAATTAAACACACCTTAAGTTTCCAAGACTACCTAGCTGCCGAAGCCTTCAGTCGCCAAGTGGGCGTTCATTTCCATGTGGATGGCAAGAACCATATTTACACCGCCAACAAAAATATTAGCCAGTACACGGTTGGAGAAAGTTTCTTAGTAGAA…	MSIKLVAIDLDGTLLNDNKQLTEENIAAINAASKMGVNIVLCTGRPITGIQRYLAQLELQ NEKEYAITYNGGLAQTINGEILIKHTLSFQDYLAAEAFSRQVGVHFHVDGKNHIYTANKN ISQYTVGESFLVEMGLRYRSVEEMNPDLEMPKVMFIDDPKVLSKARDQIFNRFQDEFSVV QSEPYFIELMPKNVSKGNAVKELAERLHLSLDQVMAIGDQGNDLSMIKTAGIGVAMENGI DEVKKNAQFITANNNESGVAKAIRKFVINK
gene1094	Single	+	1083541	1083657	117	hypothetical protein	-	-	-	-	-	-	-	GTGTTGAAAATTGGTGAATTCAGAAAATTAATTTGTGACAAGATATGGTTTTGGCAGCTTGCAGATCGGGACGTCCCTTGGGATCGGGGAGTGCTCTATCTAGGTGGCAACGCAGACGATAAAGTTGGTTTTACAAGTTTTATCTTCAAAAAAGACGGTAGCATTATTGTGCCCACAAAAGTAGGGTTTATCCCTCCGGAAGGTCACTACTGGGATTTTGACGAAGAAACCCAACAACTGCTTTTTTATGACCAAGATAGGAACCAAGTAAACTCGGCCACTTTAGTGGACCACGGAATGTACGGAGCTAACGAAATCGTACTTAGTGGCGGTGGCTCGGTGTTAATTAATTTTCCTAACTTTGATTTAGGAGAAGAGAGACCATTTTCTCACAACTTC…	MLKIGEFRKLICDKIWFWQLADRDVPWDRGVLYLGGNADDKVGFTSFIFKKDGSIIVPTK VGFIPPEGHYWDFDEETQQLLFYDQDRNQVNSATLVDHGMYGANEIVLSGGGSVLINFPN FDLGEERPFSHNFFFVPRSNFKISLQRTLARKGYDTYQVGEDATLIPYLNAIYECLIKHP EAQNIIISQNGEIIDDFFGEAGACLLIANNNGVPRLNYLAGSRDLMLELLIAILSENNKR QLNPEDYRTEEEMIEQVITVRFADRYELK
gene1095	ORTHOMCL1985	+	1083869	1084429	561	ArpU family transcriptional regulator	-	-	-	-	-	-	-	TTGGATAAACATACATTAAAAAATCTTATTTGCGGTAAATTATGGATTTGGAAGGTTTGGGATACGGTAAACGTAAACTACCATGAAAGGCCCGCAGAATTTTTTTGGGGATCTGGTGAAGACCAAGGCTTTAGCTTTGTTGCATTAGAGTTTACGAAAGACGGTAAAGTTGACTTTCCTACTAAGATAGGATTCGTACCTCCAGAATTTATTTATTGGAACTTTAATGAAGAACAACAACGAATTGAGTTCTTAAATGAGGATCGAAACCCCAAAGTATTCGCTGGCCTGCCTAAAATTGGGGTGTATGGAGCTAGGGTAATTGACTTTGCGGATGGCAACGGAATGTTGGTTAATTTCTTTGATTATGGCGTAGAAACAAACGTACCGGTTACGCAA…	MDKHTLKNLICGKLWIWKVWDTVNVNYHERPAEFFWGSGEDQGFSFVALEFTKDGKVDFP TKIGFVPPEFIYWNFNEEQQRIEFLNEDRNPKVFAGLPKIGVYGARVIDFADGNGMLVNF FDYGVETNVPVTQRGFFVSRAQSDIEKQRVLSRMGYNTYWLDDADTLIAFFNQAYENLIN HPELEEVVISRSGELEVESSPQDDQLLLANYGEGFSFDYCVGSREIVLELLIKILFTNNL RQLDPDDQRSEIEMAEQIVNEQFSDRCVFK
gene1098	Single	+	1085422	1085586	165	hypothetical protein	-	GO:0016020;GO:0044425	-	-	-	-	-	ATGATTTTCACGTATGACGTATTAAAGGACGTAATTAGCACGGGAAAACCAATTATCATTAATGAACAAAGTCAAATACAAAAATTAATGGCGGATAAAATCGCCGCAATTAAATTTGTCTCGAAAATTAAAAATGAGCATGAATACTATTGTTTCTTGGAGTTGAATCCGGGGAAGGGGATTGTGTTTTCTTCCGATGGCAACACCTTTGATGGTTTTAGCGTTTTTCAAATTCCATTAAGTGAGTTTTATTTTGACGTTGATGTTGATAAGGGCGTAATTGGAATTGAAGACGGCGTGGGTAACGAAACCGACTTTTTAGATTTATTCACTGGTCCGTCAATTGGCGAATTTAGCCGGAAGTACCACCATGCTAGTGACGAAGAAATCATGCACGGG…	MIFTYDVLKDVISTGKPIIINEQSQIQKLMADKIAAIKFVSKIKNEHEYYCFLELNPGKG IVFSSDGNTFDGFSVFQIPLSEFYFDVDVDKGVIGIEDGVGNETDFLDLFTGPSIGEFSR KYHHASDEEIMHGTTYEMTDRYLGDYLGFEGEDAQKLNLTLLRFLMAVYFDQNPASKPVK
gene1099	Single	+	1085614	1086081	468	hypothetical protein	-	-	ENOG410Y0UK	S	-	-	-	ATGGATAGTATTTTAACTAAAGGAAGCCCAATTAAGGGAATTATCTTATTCAGTATTCCGCTGCTTTTAGGTAATATTTTCCAACAAATTTACACCCTCTCCGACACCTTGATTGTTGGCCGGGTGGTCGGGGTACAAGCCCTAGCTGCGGTAGGGGCTACCAGTGGGCTGACCTTTTTGATCATTGGGTTTGCCCAGGGGATGACGACCGGGTTATCGATTATCACTGCCCAGCACTATGGCGCGGGGGATTTACGAGCGGTCAAACAAAGTTTTGCAACTAGCATTTGGATTTGTGGCGGATTGGTATTGTTGCTCACCCCGCTTAGCGTTTGGGCAACCCGACCGTTACTACGGTTAATGCAGACACCGGCTAACATTATTGATGGAGCCGCAATT…	MDSILTKGSPIKGIILFSIPLLLGNIFQQIYTLSDTLIVGRVVGVQALAAVGATSGLTFL IIGFAQGMTTGLSIITAQHYGAGDLRAVKQSFATSIWICGGLVLLLTPLSVWATRPLLRL MQTPANIIDGAAIFLSIIFGGLVATMFFNLFSNMLRALGNSRLPLIFLVIACIINVVLDI ILIVFMHVGIAGAGIATVTAQLISCFLCWFYIKARVPALSLEWREITTNWTLIKEQIRIG LPMGFQASIIAIGSIILQISLNHLGSSAIAAYTAAGKVDQLATQPMMSLGITMATFTAQN FGAKQYKRILKGIRQALTTSISYGFVMGILIILNSRTLVNLFIGNSEQHITNLAHQYFVI VSMSYFLLAILFIVRYTLQGFGKSMAPTLAGVA…
gene1100	Single	+	1086123	1086788	666	phosphoadenosine phosphosulfate reductase	cysH	GO:0003824;GO:0008152	ENOG4111IK8	S	K00390	phosphoadenosine phosphosulfate reductase [EC:1.8.4.8 1.8.4.10]	ko00920	TTGTTTCTAGTTTTACTTTTTGCGATGGATCAAGTAATTTCATTACCGCAAATAGCGGCAATGCATATTCACGACTCCCATCCAGTTGTACACGTCCTTTTGGTGGTAGTGTACACTTTGACCACTCTAGCAGTGGTGATTTTTTTGGTTCAATTTTACCGTTATAAAGTGCGCAAAAATCATAGTGATTTCGCTAATTACCCGTTGAACAGTAAGCGTTTTCGGATTATGTTATTAATGGTTGGGTTATGGTTCATTTTTATGCTTTTGCAGACTTGGTACGTAACCTACTTTAATATTGGTACTTCGGAAAACCAATCGGCGATTGAACAATTACTACGGGACACGCCAATTTGGACGTGGGTTGACGCAGTACTAGTTGCTCCGGTTATTGAAGAA…	MFLVLLFAMDQVISLPQIAAMHIHDSHPVVHVLLVVVYTLTTLAVVIFLVQFYRYKVRKN HSDFANYPLNSKRFRIMLLMVGLWFIFMLLQTWYVTYFNIGTSENQSAIEQLLRDTPIWT WVDAVLVAPVIEELIFRGLFFEFFFTKNSRLVRTIGVVVNGALFGGLHDLGASFPIYAIM GMLLAITYLWTKDIKYSITLHIINNFISFL
gene1101	Single	+	1086788	1087162	375	hypothetical protein	-	-	-	-	-	-	-	ATGATTATCAACGATCCGAATATGCGCGAGTATTTGGAAGTCCAACTTATCGGACACGAAAATAATAAGATCAAAGCCCGGACGCGGACCGGTGAATACATATTTGTTTACCCCACCGCCCGCCAAGCACGCGACCCATTATTTTGGCAGTGCTTGAAGGACATCATCAACAACAAATTGTGGCTACCGATCACAAAACAATTTCACCATTTGTTAGAAAACGACTGGTTGGTACCTTCAATGTAA	MIINDPNMREYLEVQLIGHENNKIKARTRTGEYIFVYPTARQARDPLFWQCLKDIINNKL WLPITKQFHHLLENDWLVPSM
gene1102	Single	+	1087169	1087624	456	hypothetical protein	-	-	-	-	-	-	-	ATGATGTATAAAGTAGTATTGTTTGACTTAGACAACACCTTATTAAAAACTGAAGACGCTTCGGTGGCGGTATTAAGCTACGCTCTGAAACAAGACGGCGTGACGGTTACCCCAGAGGCAATTATTAGTCTAATGGGAATCCCTGGTTTAGAGATGGCTAAACAATTGGGTGCTCCTAATCCGGAAAAGACCATCGCAATCTTTAATGAACAAATTGGTAAAGAAGTCGATTTGATTAAACCATACGACGGAATTGAGGCAATGTTTACCGGTTTGCATGAACTTGGTGTGGAGTATGGGATTGTTACTTCCAAATTAAAACGAGTCTTTGATGACGAGATGAAGCATTTCCCTAAGATTCAACAGATTAAACGGGTGGTCTTTTCTGACGATACACAA…	MMYKVVLFDLDNTLLKTEDASVAVLSYALKQDGVTVTPEAIISLMGIPGLEMAKQLGAPN PEKTIAIFNEQIGKEVDLIKPYDGIEAMFTGLHELGVEYGIVTSKLKRVFDDEMKHFPKI QQIKRVVFSDDTQKHKPNPDPILFGIKKYFAEMDLKDVLYVGDSLFDMQAAHAAGVDFAN AGWGAIPTNDFSEAEYVLQKPEQLLDIVQRSKK
gene1103	Single	+	1087627	1088328	702	nuclease	-	-	COG1475	K	-	-	-	ATGAAAATTGCTTTAATCGGCGCGGGTCCGCGCAACTTAATGGCCCTCGAACGTTTAGTTTGTTGGGGAATCAGTACCAATTACTCAGCCAATGTCGAAATATCACTATTTGATCCCTTCGGAATTGGTGGTCGAGTTTGGAATCCTGACCAAAACCACGAACTGAAAATGAATTCGTTAGCCGAAAAAATCACTTTATTCACGGATCAATCTATTGAAATGGCTGGCCCGGTTCATGAAGGTCCGAGTTTACTTGACTGGGCCCTAGCAAACGGACGCAGCTTTATTGAAGAACACCAATATCATCATCAAAAGCTGCTCTTAAATGAATTAGCGAACTTAAACAAGCACTCTTACAGTTCTCGAGCCCTTTTTGGCATCTACCAACAGTGGTTTTAC…	MKIALIGAGPRNLMALERLVCWGISTNYSANVEISLFDPFGIGGRVWNPDQNHELKMNSL AEKITLFTDQSIEMAGPVHEGPSLLDWALANGRSFIEEHQYHHQKLLLNELANLNKHSYS SRALFGIYQQWFYEQIINHLPDNFSVTLRPEWVTNVKKDAQQYTVITQDAAYNVDVVSAA LGEGNNPLSKEERQLQDFAAAHQLKYVPIAYPAEMDVDDVAASDHVIIRGLGLSFIDYLA ELTERRGGTFHRDEHGNLTYTRSGDEPTIYASSRRGLPYHARGLDQKAVGETFPRYFLSD QYVDDLVRQHQVISGEEFINRIQWDVELTYYVTLAQNSYPEIDLTAFEADLAASTKGFKK ILDNYGIAAKDRLNWEEWKNPIPKDVNDAASFT…
gene1104	Single	+	1088423	1088701	279	hypothetical protein	-	-	-	-	-	-	-	ATGCGCGAGAAAAGTTTTCGGTTGGTCAGCCAGTTTGCCATCATGTTAGTCGCGCTAGAAGTTTTAGCGATTAGCATTAACATGTTTTACGCACCACATAACGTGGCTGCGGGAGGCGCAACGGGGATTTCAATTTTGTTAGAGGACGCCTTTGGCTGGAACCGGGCGCTGATTGTCTTTATCATTAACGTGGCAATGCTGATAGCGTCGTACTTTACATTGGGAAAACAGACTACGGCCCGAATTACGGTAGGCAGTTTGTTGTTACCAGTCTGTATGGCGGTGACGCCGAGTTTAAGCTTGGTATCGGACCGCACGTTGGCAGTGATTGTCGGCGGAGCGCTGTACGCAATTGGAGTGGCGCTGTTATACCAAATTGATGCTTCCAGCGGGGGCACT…	MREKSFRLVSQFAIMLVALEVLAISINMFYAPHNVAAGGATGISILLEDAFGWNRALIVF IINVAMLIASYFTLGKQTTARITVGSLLLPVCMAVTPSLSLVSDRTLAVIVGGALYAIGV ALLYQIDASSGGTTVPPLILKKYFNFKTSVSLLVLDTIVCLMNIFSSGMEAFILALFSSV ITLLVMNYIETGIDRKKSVYIMSSRLSEVEEIISESLDQSYTSLNVQGGFSGDNRRMLML VVENAEYHRIIERIREIDPKAFILTTNVAEIHGGQY
gene1105	Single	+	1088720	1089385	666	terminase	-	-	ENOG4111XM2	S	-	-	-	ATGATTTTTGGTCCCGTTTTAGCGGCAGCGCTGATTTTAATCGGACTTTTATTTTCCCCATTCAAAATAAATAAGATTAACTCAGCCGTTGAGCAAAAAGCAGCTACGGCATTGTCCCCAGATACGCTCAAAGGAGATGCCGTAAAACGGGCCGCCTTAGAAAATGGGAATTACGTTCCCTTTTTTGGGTCTTCAGAACTTTCCCGGTTTGATTTAGCCCATCCGTCCGTAATGGCGGAAAAGTATGATTGGGACTTCCGTCCATTTTTACTAGGAGCACCGGGGACCCAATCGTTGACCCATTATTTTGAAATGCAGGGAATTAATCCCCAACTAAAAAATAAAAAGGCCGTCTTTGTGATTTCACCACAGTGGTTTGTAAGAAAAGGGGCGGACCCG…	MIFGPVLAAALILIGLLFSPFKINKINSAVEQKAATALSPDTLKGDAVKRAALENGNYVP FFGSSELSRFDLAHPSVMAEKYDWDFRPFLLGAPGTQSLTHYFEMQGINPQLKNKKAVFV ISPQWFVRKGADPHAFAFYFSQLQAVNFLENQTGKPSERYAAKRLLTMLDDRSNSTNRQV INALDRVANGQQVTSGQRTYLKYYKRLLAHEDQLFSPLSLQGTNQDHINRQVEALPNSPS DGMIQQALTRQAKRQTSNNQFGIQNQFYNKRLKKRIAAFEGMQKHYDYTRSPEFADFQLI LDQFAKNHTQVLFIIPPVNQKWADYVGLSQEMLRGFDKKINYQLQSQGFNQILDLSRDGG KKYFMQDTIHLGWYGWYVVDQNVKNFVDQPSQS…
gene1107	Single	+	1090671	1092305	1635	phage capsid protein	-	-	ENOG410XSIM	S	-	-	-	ATGTGGACAGCGACACCTTACGAAAACCCGACTTACTTTTTCATGTTAGCCATTGCCCTAGTGCCCATTGTGATTGGGATGCTACGGGGACGCCGTTTTCACTGGTACGAACTGTTAGTATCGTTTTTCTTCTTGTTGCTAACCTTTGGGGGACCAAAGTGGCAACAGGGGATTGCCTTAATTGGTTATTTAATCTTCCAGGTGATATTGGTTTCACTATATAACCGCTATCGCAAGCAGCATAACGCGACCGGAGTTTTCGTAGGGGCCGTAATACTGGCAATTTTGCCCCTAGCAGTGGTCAAAATGACGCCGTTATTGCAATCAGGTAACTCTTCGTTAATCGGATTCCTCGGAATTAGTTACCTAACTTTCAAGGCGGTTCAGACCATCATGGAA…	MWTATPYENPTYFFMLAIALVPIVIGMLRGRRFHWYELLVSFFFLLLTFGGPKWQQGIAL IGYLIFQVILVSLYNRYRKQHNATGVFVGAVILAILPLAVVKMTPLLQSGNSSLIGFLGI SYLTFKAVQTIMEIRDGVLKDYDPWFFLQFLAFFPTISSGPIDRYRRFKKDYLNVPERGH YLDLLEKGVHYLFLGFVYKFMLSYVFGSLLLPRVQHIALQTDGLSWGLLGVMYVYSFYLF FDFAGYSLFAVAISYFMGVETPMNFKQPFKSHNIKEFWNRWHITLSFWFRDYVYMRLVFF FMKHKTFKSPKTTANVTYVLNMLLMGFWHGETWYYILYGLIHGVALVINDWWLGFKKKNP GRLPHNRWTEALSIFITFNFVCFTFLVFSGFLD…
gene1108	Single	+	1092256	1093401	1146	structural protein	-	GO:0005198;GO:0019012;GO:0044423	ENOG410Y58E	S	-	-	-	TTGCAAAAAGTTACAAACGTAATTGAAAAGATTGATTCAATTGCCCAAGAGCATCCGGACTGGATTGCTTATGATTATTTGGGAAATACGCACACATATGGTGAATTAAAAGCTTTCTCAGATAATTTAGCGGCTTACATTTTAGAACAAAATATTATGGAACAAGCTCCCGTTATGATTTATGGGGGACAAACATTTGAAATGGTGGCGGCCTTTTTAGGAGCAGTTAAAAGCGGTCATGCTTACGTTCCAATTGACCGGCATTCTAATCCAGAACGGTTAACCATGATCAATGAAATTGCGCATCCTGGGATGTGTATTGCCATTGAAGACTTACCGGTCTCTTTAGATGACTTGCCGATTTTGGAAGGCCAGGAACTTTCAGACGTGTTTGCAAAT…	MQKVTNVIEKIDSIAQEHPDWIAYDYLGNTHTYGELKAFSDNLAAYILEQNIMEQAPVMI YGGQTFEMVAAFLGAVKSGHAYVPIDRHSNPERLTMINEIAHPGMCIAIEDLPVSLDDLP ILEGQELSDVFANSQSVELDQAVTGDENYYIIFTSGTTGKPKGVQISHNNLLSFVNWQMD QFDLPDRPVTLSQPPYSFDLSVMDLYATLVLGGTLKAVPKTVTDNFKELFEILPTLGLNV WISTPSFMDVCLLQPTFDADHYPALSRFLFCGEELSHATAQALKQRFPEARIFNTYGPTE STVAVSAIEITDAVLKQNDRLPIGRLKPDMGGYIIDMDNNVVKAGNEGELVIYGPAVSKG YINNPTKTNEVFFKYEGHPAYKTGDLVVMDQDG…
gene1110	Single	+	1094134	1095171	1038	hypothetical protein	-	-	ENOG41114EC	S	-	-	-	GTGGCTGGAACTCGTTTCGACTGTGCAGCAACAGAACACAAAGGATTAACAGAAACAGGGACTAATCGCGTTTTTGGCGATTGGTCCCTGTTTTGGTTAGCCGGAGGAGATTGGGCACTGAAGCCCGTTTCGACCATGCAGCAACAGAACACAAAGGACTAA	MAGTRFDCAATEHKGLTETGTNRVFGDWSLFWLAGGDWALKPVSTMQQQNTKD
gene1111	Single	+	1095198	1095587	390	hypothetical protein	-	-	-	-	-	-	-	ATGAGTGTTTCTAAAGTTAATAAGATGGTGATTGTCGCAATGCTGGCAGCCATTTCGTTTGTGTTGATTTTCATTGATTTTCCGATTTTACCGGGGTTTTCGTTCTTAAAGATTGACTTTGCGGATGTACCGATCTTGATCGGGACCGTTTTGTTTGGGCCCGTGTGGGGAATGGCGACGGCTGGATTAGCTGGGCTATTGGACATTATTGTTCGGGATAGCAACCCGGCGGGAGCCCTTGGAGCGGTAGCAAATTGGATGGCGGCGGTAGCGTACGTTCTACCAATCTATTCGTTTTTAAAACGCGCAGAAGATCAGCCGCATCACCAAGCTGTAATAGCGCTAGTTAAGGGAGTGCTGTTAGGAACGGCCTTGATGACCGTGGTGATGAGTGTGGCA…	MSVSKVNKMVIVAMLAAISFVLIFIDFPILPGFSFLKIDFADVPILIGTVLFGPVWGMAT AGLAGLLDIIVRDSNPAGALGAVANWMAAVAYVLPIYSFLKRAEDQPHHQAVIALVKGVL LGTALMTVVMSVANLFVLLPLYMKLASFQINISTLNMVLYGVLPFNILKGIIVGAVIGLL YFRLMPIVRRGEK
gene1112	Single	+	1095581	1095931	351	minor capsid protein	-	-	ENOG410Z08Z	S	-	-	-	ATGTTACTGCCTCCTTTAGAATCGGAGCACCTTCTTGGTAACTTATTTCCACAAAAAAACGCCGTTGCTCGAGTTCGGGGCAACAGCGTTAAAAACCGAATTAAAAAATTCAGTGCGCGTCAATAA	MLLPPLESEHLLGNLFPQKNAVARVRGNSVKNRIKKFSARQ
gene1113	Single	+	1095941	1096312	372	phage capsid protein	-	-	-	-	-	-	-	ATGGGAAATCCGTCAGATCGGGTCGATATGTTAAAAAGAATCATTGCGAGCGAGTCTTTGTTACTAAGTATTGGCGATGTGGCAAAGGCAATTGATGTGTCACCTCGTCAATTACGTTATTGGGAAAAGAAAGGCTACGTAAAGACCAATGTATCAGAGTCGGGCCAGCGTAAATATACGTACCCTGCACTTATTCAAGCCGGAAACATTGCCCATTACCTTAATAAGGGGTATACGTTAGCGATGGCAGCTAAAAAAGCCGAGGACAATCGTAAGTTAATGAAAATGTTACGAATTTTTTTGCAGTCCCGGGTAAACAAGGGCTACGAAATTGAAAACGGCTATGAAATCGACTTGGGTGAAGTGAAGAACTTACCTGCGGAAGAACACCTGCTGATA…	MGNPSDRVDMLKRIIASESLLLSIGDVAKAIDVSPRQLRYWEKKGYVKTNVSESGQRKYT YPALIQAGNIAHYLNKGYTLAMAAKKAEDNRKLMKMLRIFLQSRVNKGYEIENGYEIDLG EVKNLPAEEHLLIDVMQDGESYFKIKKTND
gene1114	Single	+	1096305	1096706	402	hypothetical protein	-	-	-	-	-	-	-	ATGACACAAGCATTTGATGCACATGGAAAACCCTATAAGCGGTCTTTATTGATCCTTGTGCTTTTAATTGGTTCATTTTGTACCGTTTTGAACCAAACCATTTTAACCACGGCCTTTCCTACTTTAATGAAGGCCTTCGATATCAGTACCTCGACTGTGCAATGGCTCACGACTGGTTTCTTGATGGTCAACGGGATCATGATTCCCATTAGCGCCTGGTTGACTAGCCGGATTCCTTCCAAGCGGCTATACCTTTCAGCCATGACGATATTTTTAATTGGGACCACGTTCTGTTACGTAGCCCCGTCGTTTTCAGTACTCCTTGCTGGACGACTAATCCAAGCGCTAGGGGTCGGAATTACGATGCCCCTTTTGCAAACCATGATGCTAACCATTTTC…	MTQAFDAHGKPYKRSLLILVLLIGSFCTVLNQTILTTAFPTLMKAFDISTSTVQWLTTGF LMVNGIMIPISAWLTSRIPSKRLYLSAMTIFLIGTTFCYVAPSFSVLLAGRLIQALGVGI TMPLLQTMMLTIFPANQRGSAMGLAGLVVGVAPAIGPTLSGWVIDNYHWRTLFGMIIPIV IVVLIAGFFFMKDVLKTEHTQLDWISAALSTIGFGSLLFGFSEVGDKGWTDSLVVATLII GAIFVILFGARQLRSKNPFLDLRVLKIPEFSISATLSSVSMIAMVGAEMVLPLYIQTVRG ESAFHSGLTLLPGALMMGVLSPITGRLFDRIGARRLATTGMFLLTIGTLPFAFITRTTPM LYIIVLYAIRMAGISMAMMPVTTAGMNSLPFDK…
gene1115	Single	+	1096718	1097314	597	hypothetical protein	-	-	ENOG4111PTJ	S	-	-	-	ATGATTATTTTTCTACTAATACTTGCTGTGATCGCAACCTTTGTTTCAATGACCCTAATTCCCAAACCCGTGGTTCGTTACATCTGTACCGCAATTTCTGCCATCGTGGTCGTTGGCTCAGTAGCGCTATTGGTAATGAACGACCGGGAACATTTCGGAATGGAGAAGATCACCGAAACAACCACCCAAACCGTTTATTCAGTTTCACCTTCAAAACAAATGCCCATGTTACTTTATAAGAATATTGGGACCGATGGTAAGGAACGAGTTTACGTTTATAAAAAGGATGCGGACAAAAAGAAAACTTCCCACACCGAATTGGAAAAAACTACTAACCGGGTTAAGACCACTAACGATGACCAAGCCCATTTAGAGAAGAAAACCACCCGTTGGGTATAC…	MIIFLLILAVIATFVSMTLIPKPVVRYICTAISAIVVVGSVALLVMNDREHFGMEKITET TTQTVYSVSPSKQMPMLLYKNIGTDGKERVYVYKKDADKKKTSHTELEKTTNRVKTTNDD QAHLEKKTTRWVYKNDTYRLWFGIAGNDREVSHRVNTFYVPKNWPTLSTTEAAKLQKLVK QNQASMKKDATKYVKAKVTATVKDTLKAALQKNPRMSPAEQKKLTDKTTAEATKKFSAEY QAQMMQKLIEQAKK
gene1116	Single	+	1097325	1097771	447	hypothetical protein	-	-	-	-	-	-	-	ATGGATTTGATTACAATTTTGCGGAAAGTCAAACGCCGCCTCCTAACCTACGCATTCAAAATTAACTACCGGCCCGCAAAACGGCCCACCGTTATTTTTGAAAGCTTTGGAGGGCGACAAATTAGTGACTCGCCGTTAGCAATTTATAAAGAAATGAAAAAAGAACATCCCGGTTATCGTTTGATCTGGGTGGTGAATAAGCAACTGGTTGAAGACGGGTTTCCGAATGGAGAACGTTACGATTATGTGGTTCGGGGATCTTTTAAATGGGTGCGTACGATTGAAAAAGCGCACGTCTGGGTTGAAAATGCCCGGCTGCCTCGTTGGGTGAAAAAGCCGGCGCACGTTAAAATACTGCAAACTTGGCATGGTACGCCGTTGAAAAAGTTGGGCTTGGAT…	MDLITILRKVKRRLLTYAFKINYRPAKRPTVIFESFGGRQISDSPLAIYKEMKKEHPGYR LIWVVNKQLVEDGFPNGERYDYVVRGSFKWVRTIEKAHVWVENARLPRWVKKPAHVKILQ TWHGTPLKKLGLDIAQVTMPGTTTEKYRENFVHEANRWDALISPNAYSTKIFRQAFGYQN EILEIGYPRNDELAHPNAAKIRQLKEKLGIPLDKKLVLYAPTYRDNQFFTKGKYAFSLPF DLAKLRAALGEDTILLLRMHYLIANAVDLTGVEDFAIDVSNYPDVADLYLAADVLVTDYS SVFFDYAYLKRPIVFFPYDYETYRDELRGFYLDYQKDLPGKIVYNEGELTHELAQLAKET QQQLSPQFEQFYARFCAIHAGDAAAQATNWVSQ…
gene1117	Single	+	1097776	1098393	618	hypothetical protein	-	-	ENOG4111NHP	S	-	-	-	ATGTCAAAAAAATTGATTAATAAGTTGGTTATCGGTGGATTAATCGTTCTCGCATTGATAATAGTTTGGGGTCAGGCAAGTACACACTTAAAAAAGCCCGCCGCTACTGAAAAAAATAATCATTTGGCGATTCCACGAGCGACTCATTCGACGGAAAGGGGAAGGTTGCAGCAAGCACTTTCACCAACCGGATTTAGTGGCTCAGCAATTTTAGTAAAGAACAACCAAATTGTTGATAGTTACACAGCGGGAACGAAAGACAATGAGAGTGGTAAAAAGAACCAATTAACTACTGCTTACGAAATTGATTCTTTGCAAAAATCGCTCACGGCTGGATTAGTGATGACCTTGGTTAATAGGCATGAAATCGCGCTTACGGATCATCTTAATCAATACATA…	MSKKLINKLVIGGLIVLALIIVWGQASTHLKKPAATEKNNHLAIPRATHSTERGRLQQAL SPTGFSGSAILVKNNQIVDSYTAGTKDNESGKKNQLTTAYEIDSLQKSLTAGLVMTLVNR HEIALTDHLNQYITGIPGSAEITIRQLLDMTSGLSLPKLKYKGDSLSRKQYLKILRKNVK FQPQKYGKWNYQPVNYVLLSMILEKVTGDSYQQLFVERYTSKLNLQQTVFATDTTGYDTA KGYYLKKQGDEVKQVLQKPNLATVESELGTGQVYMSVADYYKTLAKLLNGGLLGKPTVQT LYRPANGAQVKYHGGLYTNHQNYYSANGYGYGFEDHIRISPDGKQALIVFSNHQGNKIKG QKLKQAVDKLTNQYFKTAQINE
gene1118	Single	+	1098397	1103676	5280	tail tape measure protein	-	GO:0016020;GO:0044425	COG5283	S	-	-	-	ATGATCAAACGATACAAGTCTTGGTGGTTATTAGCACTTTTTTTCGCCGCCTCAGTAATTATGACCTATCCAGCTTTTAGTGGGCATTTTATGAAGCTAACAATGGATGGTGGAATTCATCTTTCCAGAATGGAATCAATTTTTGAGATGATAAAGATGGGGAAATTGCCACCTTTAGTGAATTTTATTGGCTTAGGGAATCACGGTAATGCTTTTAATGGGATGTATCCATGGGTTTCAATGGCTATCTTTTTTGTTTTGCCAAGGTTTTTCTTGACTAGCCCGATGCATGCACTATTTGCAAGTTATGTGTTAATTAATATAGCTACATTATTCAATGCTTATCTATTAACAAGAGAATTAAGTAAGGATACAAGGATACGGCTATTTGCAACGCTT…	MIKRYKSWWLLALFFAASVIMTYPAFSGHFMKLTMDGGIHLSRMESIFEMIKMGKLPPLV NFIGLGNHGNAFNGMYPWVSMAIFFVLPRFFLTSPMHALFASYVLINIATLFNAYLLTRE LSKDTRIRLFATLFYGFNAYHLTLLFSRNAVGEALAYTFAPLVLLGCFQIWRGRTRGILH IALGMGMIANSHVISLFLMVLFLVVLEFSRLILKKITWQEIINFVIAGGLAVLIGFYSIT NIIKISRANHLYTPGKKLVPIQVSEMVTNVLNNSIQDKSEVFNIGLIGLGILLFLLIQLF RHQKLQSWNGWGLLAIVLFILTTAWLPFQKPWVINSIFGNIQFLGRILSLIILSLVIAIT LYLTQNHKYNVFMLTFTSVLLIVMGIGSVSQFH…
gene1119	Single	+	1103669	1104490	822	tail protein	-	-	-	-	-	-	-	TTGAAAAAGTTATCAGTGATTGTACCAGCTTATAATGAAGAAGAAACCGTCGAGCTGTTTTACGACGCCTTTGCGAAGGTGGAAAATCAAATGGACGTTGAGCCCGAATTGATTTTTGTCGACGACGGGTCAAAAGATAAAACCCTAGTTGAAATCAAAAAACTTCAAAAATTACATGAGGAAATCCACTACATTAGTTTCTCACGAAACTTTGGTAAGGAAGCGGCGTTGTACGCCGGCTTACAAAAAGCGAGCGGAGAACTAGTAGCGGTGATGGATATTGATTTACAAGATCCACCGGAATTGTTACCCCAAATGGTCAAAATGATCGAAGAGGGCGAGTATGATTCAGTGGCTACGCGGCGTAAAGACCGGGATGGAGAAAGCCCTGTACGTTCT…	MKKLSVIVPAYNEEETVELFYDAFAKVENQMDVEPELIFVDDGSKDKTLVEIKKLQKLHE EIHYISFSRNFGKEAALYAGLQKASGELVAVMDIDLQDPPELLPQMVKMIEEGEYDSVAT RRKDRDGESPVRSFFARQFYKWINKVSSLELVDGARDFRVMTRQMVDSVLSMRERERFSK GLFNWVGFNTYYISYENRERAAGKTSWSFWGLMKYAIEGFVSFSTAPLSFVTSAGIATCV LAVLGALAVIVRAIIFPHTSAFGWPSLVVIILFFSGVQLLSLGIIGRYIAEVYLEVKDRP VYIVREEE
gene1120	Single	+	1104505	1105866	1362	hypothetical protein	-	-	ENOG410YD7R	S	-	-	-	ATGTTAACTAGTGTGACAAAAGGTAAAAGACACCTGCCTTTTATAATTGCTTTGTATTTTATTATCATGAGTATCCTGACCTTTTATTTTTTGTATAGAGGACATGTTATTTATAGAGGAGCTGACGTGCAGTTCCATATAAATAGAATTGAAGAACTATACCAAAATTTAAGACATGGCAATATGTTTCCAATGATATCAACTTATTCTGCTAACCAAGTAGGAATAGCAACCAATGTTTATTATCCGGCATTATTTTTATACATGTTTGCTTTGCTTCGCTTTTTGCCGGTAAGCCCAATTACAGCTATATACTTAGGATTAATGGTAATTAATCTAGTTACCTTTCTAATTGCTTATTACACGTTCAAAGATTTTAGTGGCTCAAGAAAAAAGGCT…	MLTSVTKGKRHLPFIIALYFIIMSILTFYFLYRGHVIYRGADVQFHINRIEELYQNLRHG NMFPMISTYSANQVGIATNVYYPALFLYMFALLRFLPVSPITAIYLGLMVINLVTFLIAY YTFKDFSGSRKKAFIFANLYFFSTYRFLDILNRFDISEFIALTFIPLVFWAFYKISFKNE FDKWIWLAAGMGALLYSHILTALIVTITMGLLMVFNVNSLSNFPSVIKAYLKAVVLFLGL SSAFIYSFLVNYLHTPVKMPKEFLFSNTAMQLGTFVNNSISNNITGNASTFNMGIVALLI LIIGAFRFNTFSKLYKKIYVVSVVTTLLSTNLFPWSLLQNTPVSLLQFPFRVFVVATFFI ALLGVELVNELRIKHVALLLVAILYIFNISSTQ…
gene1128	Single	-	1111292	1111176	117	hypothetical protein	-	-	-	-	-	-	-	ATGAAAATTAACGTTGCATTATCTAACGGGTACTTACCCGATCGTTTTGGCAAATACGCTCCCGCAGCCGACAAGCTTCACGATTTGCCAATTCGGTCTTTTCCCATTGAAATTAGTGAGTTGCCTACTGACACAGCAGCCTTAGCGCTAACTTTAATTGATTACGACGCCGTTCCCGTTGCTGGCTTTCCGTGGATTCATTGGATCGCGACCGACATTGCCGTGACCAATCTGATTCCTGAAAACGCCAGCGCTTTGGAAAACGGGATGACCCAGGGAAAGAATAGTTACGTTTCTAAGTTTTTAGACGTGGATGATCCCGCAATTTTCGAACACTATTCGGGACCTAAGCCGCCTACCGACCACGAATATACGTTGACCGTTTACGCGCTCAAGGAA…	MKINVALSNGYLPDRFGKYAPAADKLHDLPIRSFPIEISELPTDTAALALTLIDYDAVPV AGFPWIHWIATDIAVTNLIPENASALENGMTQGKNSYVSKFLDVDDPAIFEHYSGPKPPT DHEYTLTVYALKEPTNLPKGFYLNDLMRKIEALALDSAQIKIPSRG
gene1138	Single	-	1124009	1123734	276	transcriptional regulator	-	GO:0005488	ENOG4112AZ5	K	-	-	-	ATGGGCTCCAGTGCCCAATCTCTTCCGGTTAACCAAAATACCGGCTCAATCGCCAAAAGCGCGATTAATCCGGCATTTCTGTTAATCCTCGGAGATTACCCGGGCACTTCCGCCCTCTAG	MGSSAQSLPVNQNTGSIAKSAINPAFLLILGDYPGTSAL
gene1139	Single	-	1124377	1124015	363	addiction module toxin RelE	-	-	ENOG41124T6	S	-	-	-	ATGGCAAATTTAGTTCGAATTGGTAAAAGTGACGTAGAAACCACGGCGTTAGGATTAGGAACTAATAAAGTTGGCGGACATAATTTGTTCCCGAATTTAAAGGATGAAGATGGTTATGCGGTCGTGCGGAAGGCGTTGGATGAAGGAATTCAATTGCTAGATACTGCCTTTATTTATGGGAAGGGCCGTTCAGAAGAGATTATTGGCGACGTTTTACAAGATTACGACCGCTCTAAAGTGGTTTTGGCAACTAAGGCGGCCCAAGATCCGCTGCATGATTACCACCCCAACAACGATCCAGAATTTTTGACGTTACAAATCGACGCAGCTTTGCGGCGGTTGAAAACGGACTATATCGATATTTTTTACATCCATTTTCCAGACGAAACTACTAACAAA…	MANLVRIGKSDVETTALGLGTNKVGGHNLFPNLKDEDGYAVVRKALDEGIQLLDTAFIYG KGRSEEIIGDVLQDYDRSKVVLATKAAQDPLHDYHPNNDPEFLTLQIDAALRRLKTDYID IFYIHFPDETTNKYEAINALVKARKEGKIKAIGVSNFSLAQIKEANVEDVIDVVEDDYSL VHRDAEKELFPYLAEHQISFVPYFPLASGILTGKYTKKDHERFDQYSEAQFNQIIEATEK VRQIAEAKQATVAQVILAWYLKNPAISVVIPGARKPEQVESNAKATEIELSEQEYKEIDE WFKN
gene1155	Single	+	1140447	1140581	135	hypothetical protein	-	-	-	-	-	-	-	ATGAAAGTTGAAAAAAATGTTGTAATTAGTGAATTCATTGTTAACATGTATGACCCTCACTACGGGCAAGACAATAGTAATGTCGACATTCCTGAAAGGACTCGAACTCAAGCCGAATCTTTAACGCGGTTTCGCGTGCCGTACTACGTGTTAACTAATGCAGAAGGTCAGGAAGCAGAAACTGGTGCCCACATTATTCACATGGACTTATTTAACCACTATCCTGACCTAACTTTGTACTTCCATCGAATCTTGATGGCTTTCGAATTCCTACAAAAACACCCCGAAATTGAGAAAGCTGCACTAACTGACGCGGGAGACGTTACAATGGCTAACTATCCCTTTGATAAAGTCGAGGAAGGTACTTTATACATGGGCGACGAAAGCTTCTATATCTTT…	MKVEKNVVISEFIVNMYDPHYGQDNSNVDIPERTRTQAESLTRFRVPYYVLTNAEGQEAE TGAHIIHMDLFNHYPDLTLYFHRILMAFEFLQKHPEIEKAALTDAGDVTMANYPFDKVEE GTLYMGDESFYIFATPVITWHKDLQRIEDFIRENGLLPTLNLGVMVGTRAVLLEFLGIMV DIITEAQLKLSQGDDSYRLSDVEMAISNYVAYKYFGDRLVHGREVTTVMDGYQEPSSAWF KHK
gene1156	Single	+	1140701	1141054	354	hypothetical protein	-	GO:0000988;GO:0001071;GO:0005488;GO:0016020;GO:0044425;GO:0009987;GO:0008152;GO:0050789;GO:0065007	COG2826	L	-	-	-	ATGTTAAATAAAGAACAATTAAAAGATTTAATTTGTGACCGTTTTTGGACATTTCGGGGATTTGATGATAAAAAGCATTTTAGCACCTTGTTTATTGGTACAGAGCCTGGTTCTGGAATGCTAGCACTTTGGTTTCATCGCGATGGTAGCATCACTTTCCCTACTAACGTAGCTTTTGAACCTGGTGAATACCGCCACTGGGATTTTGATGAAGACGCCCAAGAAATTATTTTCTTTGATTATAACCAACAGCCTAGCAAGCGCGCACATTGCCCCGTTCAATGGTTTGGTGACAGTCTTAAGATCGAATTAATCTCGGACTCGGATAATACCGAAATCTTCTCACACGAACCACACGTTGACCAATTTGCCCTTAAAAACCGGGTAATTGGGGGAATC…	MLNKEQLKDLICDRFWTFRGFDDKKHFSTLFIGTEPGSGMLALWFHRDGSITFPTNVAFE PGEYRHWDFDEDAQEIIFFDYNQQPSKRAHCPVQWFGDSLKIELISDSDNTEIFSHEPHV DQFALKNRVIGGIHMFFAPRSVYNFELFQDLAFLNFNIKLIDTEDSIIDFLHEVYQYAIA HPQLEELVISQEGQPHVQLSREHKLLFTSNDGQPSYNYFSGERPLVIELLTVILAENRKR LLNPDDSRNEKEMIQDIISNRFTDRYEIV
gene1157	Single	-	1141724	1141494	231	hypothetical protein	maa	GO:0003824	-	-	K00661	maltose O-acetyltransferase [EC:2.3.1.79]	-	ATGGATTTTAAAGAAGCATTTGAAATGATCAAAGACTACGAATGGTTTTATGAAATTAATGACGTGGGAGTAAGTCTTACGCTTGGAGGCAAGGGAATTTTAGCCTTGAAATTCATGCCGGATGGGACAATTGATTTCCCAACTAACGTGGGTTTTATCCCTCCAGAATGTCATCGCTGGGACTTCGACGAGCAACAACAAAAAATTTTGGTTTATGGTGTCCAAGGAGAAGTAGAACAAACCCTTAGTTTACCAGTACGAGAAGGTGCCACATTGGTTATGGATGCTTATGGTAAACACGAACATTTTCGCGTTTGGGACGCTATTTTCAAAAAATCAAATTTACAAGTTGCTCCGGATCCGCAGTCAGATCATGGGTCGATGATATTGGCCTATCAA…	MDFKEAFEMIKDYEWFYEINDVGVSLTLGGKGILALKFMPDGTIDFPTNVGFIPPECHRW DFDEQQQKILVYGVQGEVEQTLSLPVREGATLVMDAYGKHEHFRVWDAIFKKSNLQVAPD PQSDHGSMILAYQYDNQTQLGQLVENLGLNVHCLDENPQTWQGIQEIFDYLIEHPYLKKV AIMFDLDFAANPFESFDSTNDNQLVFDDQQSFIRAPRDLMLEMLGKFLIDLNHEAFEHKL MDDDHYEQSLMPYLKENFGERLKQCDK
gene1158	Single	-	1141967	1141797	171	hypothetical protein	-	GO:0003824	-	-	-	-	-	GTGAAAATGGATAAAGTTGTAGCAGATAATGTCATTATTGGTGAGTTCATCACCGATTTATTCGATCCGCAGTACCAAAGCCATGCTCATTTTTCAAATGGCGTAGAATCTTTAGCAAAAAATTTAAAGCACTCTGCAGCATACTATCAGCTCCCGGTGTATATACTTTCTAATGGATTAGAAGAGGATTACGTAGACGAAAATGCGCATTACGTTAATATGGATGTTGATGCGAATCGCTATGATGTTTCAATTTACTTTATCCGTTGGGAAATGGCACTAGATTTTTTGGTTAAACATCCAGAAATAAAGAAAGTAGCACTTGTAGATTTTTCAGATGTGGAAGTCTATAACTATCCTTTTGACAGAGTTGAAGACGGGATTTTATATTTTGGGGAC…	MKMDKVVADNVIIGEFITDLFDPQYQSHAHFSNGVESLAKNLKHSAAYYQLPVYILSNGL EEDYVDENAHYVNMDVDANRYDVSIYFIRWEMALDFLVKHPEIKKVALVDFSDVEVYNYP FDRVEDGILYFGDELKSIGGGIVKGDKKPDFMERFFIENSQLQMLNPGVIVGTRAVIMEF LTILVEIFTRAQVQKMRQVPKSAFGDYEMALVNYVAYRYFKRRLKHGREVSTKFNYWEPV SSAWFKHK
gene1160	Single	+	1143253	1143447	195	DNA-binding protein HU	hupB	GO:0005488;GO:0009987;GO:0071840	COG0776	L	K03530	DNA-binding protein HU-beta	-	ATGAAAGTCGAATCTAACATTGTTATTAGCGAATTCATTGTAAATATGAAGGATCCATTTAAAAATGCAGATAACCACGGTATCAACATTTCCGATATAGTTGATTCCCAAGCTAAATCTTTATTTGAACATTCCGTCCCCTACTACGTGCTCACTAATGGGGTTGATCAAGAAGGTCCCGTGGGCACTCACATTGTACATCAAGACTTGTTTGATCATTTTCCAAACTTATCTTTATACTTCCACCGAATTTTAATGGCTTACGATTTCTTACAAGCTCACCCGGAAATAAATAAGGCAGCATTAACAGATGCTAGCGATGTAACAATGCTTAATTATCCTTTTGATAACGTCGAAGAGAACGTTTTATATATGGGTGATGAAGATTTCTATATTTTT…	MKVESNIVISEFIVNMKDPFKNADNHGINISDIVDSQAKSLFEHSVPYYVLTNGVDQEGP VGTHIVHQDLFDHFPNLSLYFHRILMAYDFLQAHPEINKAALTDASDVTMLNYPFDNVEE NVLYMGDEDFYIFGTQTITDRREIEFIDDFIVENGLLPTLNLGVIVGTRSVLLEYLGIMV KIITDTQLAVAKGNPSYQLSELEMALSNYVAYHYFNNRLVHGRAITTILDGMQKPNSAWF KHK
gene1161	Single	+	1143410	1143535	126	DNA-binding protein	hupB	-	COG0776	L	K03530	DNA-binding protein HU-beta	-	ATGTTAACTAAAAAAGAAATAATCAATTTAATTTGTGATCACATTTGGAGCCTTCGAGTCCCTACAGACCAGCACCATTTTACATATTTAGTACTCGGTAGGTCTGGTATAAATGGAAAGTTAACTATCATTTTTCGTCGTGATGGTTCTATTGATTTTCCCACTAACATAGCGTTTAAACCCGATGAATTTCATAAATGGGATTTTGATGAGGTAAAACAAGAAATCATCTTTTTCGACGGTAACTATCAAGAAAGCAAACGTGCAACTGCTCCAGTACAATGGGCAGGAAAAAGTTTAAAAATCGACTTAATCGGAGAAAGTAACGTATTTACTTATGAACCTCACGCCGAAAAAAAAATTGTTGAAGAGCAGACCATCGGGGGAGTAAACCTATTC…	MLTKKEIINLICDHIWSLRVPTDQHHFTYLVLGRSGINGKLTIIFRRDGSIDFPTNIAFK PDEFHKWDFDEVKQEIIFFDGNYQESKRATAPVQWAGKSLKIDLIGESNVFTYEPHAEKK IVEEQTIGGVNLFFIPRNTYSFEKFQNLARAGFTIKRINPTDSVLSFLSAAYDYIVMHPK LKKIVISQIDQIFTPTISHGKLLFANVAEEPSFTYLTGTRGIIMELLTTILSENNKRLLN PEDYRSEEDLLQEILISRFNNRYDLVDLPIKQ
gene1162	Single	+	1143754	1144839	1086	BMP family ABC transporter substrate-binding protein	bmpA	GO:0044464;GO:0005623;GO:0016020	COG1744	S	K07335	basic membrane protein A and related proteins	-	ATGCTAAGTAAAGAACAATTTATTGATGCCATTTGTAATCGCTTTTGGTTTTACAAAAATATTTCCGCTGACACACCATATGAAAGCCTCCCTAAGGCACTTCCTTTAGAATATGGGCCAAAGCAAGGTTACGCTTATTTAGGAATGGAATTTATGGCAGATGGCGAGATTACTTTTCCCGTGAAACTTGGTTTTATCCCACCAGACTTTTATCGTTGGGATTTTGATGAAGAACATCAGGAGATTATCATTTATCATCGAGATAACGACTCTGTAAAAAGAGGGGAATTAATTAAAGATGGTTTTTACGCCACTAATGTAATTAAACTAGCTCCCTCAGACAATAATCAGGGAATCCTCATTAATTTTCCATTTTATGATGCTCCAGAAGTTACTAGT…	MLSKEQFIDAICNRFWFYKNISADTPYESLPKALPLEYGPKQGYAYLGMEFMADGEITFP VKLGFIPPDFYRWDFDEEHQEIIIYHRDNDSVKRGELIKDGFYATNVIKLAPSDNNQGIL INFPFYDAPEVTSRTIGGNNMVFIPSNFFNSVVTTNFTRRGYNVSPVTQNDNLFSFVSEI YRYLIEHPKLADVIIVRTGIKNMAIKFPQNLNQLLVAKDNNQPSLDYCAGSRAIILELLI MLITANNNRLLDPDDRRSETELVTHILTNHFINRYDLLA
gene1163	Single	+	1144910	1146436	1527	sugar ABC transporter	-	GO:0005215;GO:0003824;GO:0005488;GO:0051179;GO:0044699	COG3845	S	K02056	simple sugar transport system ATP-binding protein [EC:3.6.3.17]	-	ATGAATGTTGAACCTAACGTAGTCATCACCGAATTCATCGTAGATGTAGACAACTTTTATCACCATATTGATAACAGCAACATCAATATTGAACAGCAAGTTCAAAAATTAGCCCAATCATTACAACATTTCAATGTACCTTTGTATACTTTAACTAATAGTAATGAAGAAAAGGATGCTGTCGATTTCCACATTATTCATATGGATCTCGCAAAGAATTACACTGGTTTAACGGTGTTCTTCCATCGACTTGTACTAGCATTTCGATTTCTTCAAGCCCATCCAGAAATTGAAAAAGCCATCATTTCTGATGCCTCAGACGTGACCATGCTTAACTACCCCTTTGATTCAATGGAGGATGACAAGCTTTATATGGGTGATGAGTGGGGAATCATGGGT…	MNVEPNVVITEFIVDVDNFYHHIDNSNINIEQQVQKLAQSLQHFNVPLYTLTNSNEEKDA VDFHIIHMDLAKNYTGLTVFFHRLVLAFRFLQAHPEIEKAIISDASDVTMLNYPFDSMED DKLYMGDEWGIMGDTYVLHSDRDPFFIKKFIAENQLLPTMNMGIIAGTREILIEYLGIII QLISDSQVKVRQGDSTAALGNHDMELGNYVAYRYFADRLIHGRKINTIFQGFQSISSAWL EHK
gene1164	ORTHOMCL1986	+	1146440	1147594	1155	branched-chain amino acid ABC transporter permease	-	GO:0005215;GO:0044464;GO:0005623;GO:0016020;GO:0044425;GO:0051179	COG4603	S	K02057	simple sugar transport system permease protein	-	ATGAAAGTTGAACCAAATATTGTCATCAGTGAATTTATCACTAATATGAATGATTTATTGCACCAAGAGGACACACACAATGTAGATATTTCGGAAAAAGTTGTAGAACAGAATCAGTCATTAAAGCGATTCAACGTGCCATACTATGTATTAACTAACGAAGCCAGTCAAGAACCAATCGACAATTTACACATAGTAAACGTTGACTTACAAAAAATTTACGACCGTTTTCCTGACTTAACGGTGTATTTCTATCGAGTTTTTATGGCATTCTATTTCTTACAAGACCATCCGGAGATTGAAAAGGCTGCCCTCACCGACGCTAATGATGTAACCATGCTTAACTATCCGTTTGATAAGGTTAAGCCTGATACTCTATACATGGGCGACGAAACTACT…	MKVEPNIVISEFITNMNDLLHQEDTHNVDISEKVVEQNQSLKRFNVPYYVLTNEASQEPI DNLHIVNVDLQKIYDRFPDLTVYFYRVFMAFYFLQDHPEIEKAALTDANDVTMLNYPFDK VKPDTLYMGDETTFLFYSSLVYMDKNPWFLKNFIFDNSNSLPTLNLGVMVGTREVLIEYL GTMVKLITEAELKVQQGDESYRLGNFEMAISNYVAYKYFPDRLIHGREVTSLFGGYQKNS SAWFKHK
gene1165	ORTHOMCL1986	+	1147594	1148550	957	sugar ABC transporter permease	-	GO:0005215;GO:0044464;GO:0005623;GO:0016020;GO:0044425;GO:0051179	COG1079	S	K02057	simple sugar transport system permease protein	-	ATGCTAAGTAAAAAAGAAGTTTATAATTTAATTGGTAATCGAATTTGGATATATCAAATCACCTCTGAAAATCATCCTTTACCTACGCTAATCCAATTAGGAGAGAGTCCAGCATATTTTATGGTTACTTTTCACAAAAACGGACGTATCGAGGTTCCTACGGATGTTGGTTTTACTCCACCAGAATTTACGTATTGGGATTTTGATGTAGAAGCTCAAGAAATCCTCTTCAAAAATGGAGAAAACCAGGTTGCGTTACGAGCACAATTGCCTCAAGAACTTCCTTACGGTGTTACCGCTATCAAAGTAAATCAGCTTCCCCAGCACGGAGATAACCAGTATATGCTCGTTAACGCCCCTCATGAGGATCACGAAGAAATTACTCAACGACTTTTGGGT…	MLSKKEVYNLIGNRIWIYQITSENHPLPTLIQLGESPAYFMVTFHKNGRIEVPTDVGFTP PEFTYWDFDVEAQEILFKNGENQVALRAQLPQELPYGVTAIKVNQLPQHGDNQYMLVNAP HEDHEEITQRLLGGTRIIFVPYSALNEDIFYNLRWRGFNIHWVEQGPELTNFFTEVYDYL AVHPKLEQIVVSQKSTNITKFSSKDQLLFLNDHGKPSFNYFSGSRQLLMELLLMILSENN MRLFDKNEQQSEEELLQEILIKNFNNRYELVDLPEF
gene1166	Single	-	1148733	1148605	129	hypothetical protein	-	-	COG1680	V	-	-	-	ATGACTAATAATCTACGTTACATAATTAAGAAATGTTTGGTGATCGCGGGGGCAATTATTGCCACGTTGCTGATCACTACCCAACTAGCGATGGCGGCGCAGAAAAATGTGCGTGGGACAGCCATTGAATGGGGGAATTCTACTTGGGCATTAGCAGATGACGGCGAATTAATGTCAATGGGCGGTGATATTGGACAAGCGCCACCACTACATGATGTTCTAAGTAACAATGGAATTGAACCTGGGCAAGTAAAAAGTATTGAATTTACTAAGGCCACTAGTGCTCATGATATTACTGATATGTTGGGAAATCTGCCTAATTTACAGAAAATTACTAAGATAAGTAATTTACATTATTCGGGTAATGGTGATCAAATGTTTCGTGATAACACGGTTTTA…	MTNNLRYIIKKCLVIAGAIIATLLITTQLAMAAQKNVRGTAIEWGNSTWALADDGELMSM GGDIGQAPPLHDVLSNNGIEPGQVKSIEFTKATSAHDITDMLGNLPNLQKITKISNLHYS GNGDQMFRDNTVLESIDFKGFDTSKITSMSFMFFNTGFKSLDLSGFDTSQVTSMYGMFDN AGKLSSLNIKNFDTRKVDSMGFMFNNIIAHDLDVSSFNTSNVNNMEGMFDGTSVDKLDLR NFDTSKVGTMEYMFLNSAVSQLDISSFTIGDEVNTSTMLQGTNHLKQLALGKKSQLKDDM NIPDVPTTDGYTGHWQNVGNGTVDEPAGNHVWTSTKLMSNFDAPTMGDDTFVWQRKPATI NIGETTDYKNDPVLSEFVPTAVDPLHPYRYNVV…
gene1167	Single	+	1148888	1149769	882	transposase	-	-	COG3464	L	-	-	-	ATGGCTAAAAAACAACCTACCCGTGCAGAAGTTCCCGTTGACCTAACTTGGAACGTTGCGGACATTTTTGCTACGGAGACAGACTTTCACGACGCAATTACCGCCGTTAAGTCTCAAATTGAAGACATTCAAAAACTTGCTCAAAAAGGAATACAAAATGCCCATGATTTACTTGCGGCTACTAAATTACTCTACGAGAGTGAAGAAGCAGTTCTAAAAATTTATGGCTACGCTGCGCGCGTCAATGACGGCGATACGGCAGACCCGCATGGCAACGATCTTTTAAACCAAGCACTGTTGGTCTTAAATAAATGGGAGGCTGCCGTTGCATTCTACGATCCGGCAATTACAAACCTTTCTGCTGGACAACTCGACCAGTTCCTAGAAACTGAACCAGCC…	MAKKQPTRAEVPVDLTWNVADIFATETDFHDAITAVKSQIEDIQKLAQKGIQNAHDLLAA TKLLYESEEAVLKIYGYAARVNDGDTADPHGNDLLNQALLVLNKWEAAVAFYDPAITNLS AGQLDQFLETEPALKQYEFNLRRVQAQAAHTLTPSEEKLLAQLQPAIDDAAEISAKLDDA DLDFGMIKDENGEEVQLTNATASEFALSSSQEMRMKASRQVAKAYRSMRNTFAATLRSHV HAQNIMAEIRHFKSAREMNLSDQKIPETVYDTLIETTHEHLDLMHDYYAFRKSFLGLKDM YQFDRHVSLVADAKLSLSFEEGKKATMAALAPLGKDYQAHLQTEFDQRWIDVAENKGKRS GGYEDDVYGVHPYILLNWNDIYDSTSTLAHESG…
gene1168	Single	+	1149833	1150201	369	hypothetical protein	-	-	COG3464	L	-	-	-	ATGTTAAATAAATTTAGCCGTTACGCAGATTTAAAACAGGTGGCGCTCACTTTAATTGAAATGGATGCGGTTCCAAATGTGGAGCTACGATTAGCGCAAATCATCGCCCGGGGAATCGATGACACGTTTATTCCAGAAAATGTTAACCCAGAAGAAATCGACGAGTATCTAAGAACCCGCGCGTTGCACTTTTGGTTTTACCCGTCCATGCATATGGATAAGGTGGTTCCTAAGTTGGCAAGGGAAGTCGCTGATAAATGGGAAATTCAACAGGGTGATAAGCCGATGTTAGAGGCGTGTCTAGAAACGGTGATGTCGTATTACCCGGACGCGGCTGATTATAAAGCAGATTCTACGCTGGTAACTTCTGATGAAATAGATCCCTACCAGACTCATCCG…	MLNKFSRYADLKQVALTLIEMDAVPNVELRLAQIIARGIDDTFIPENVNPEEIDEYLRTR ALHFWFYPSMHMDKVVPKLAREVADKWEIQQGDKPMLEACLETVMSYYPDAADYKADSTL VTSDEIDPYQTHPIDTNLGIYLASNPDTEELATIDGFDVAKINSYLNSQGIPGIPGVRLK RSRA
gene1193	Single	+	1176651	1177475	825	transposase	-	-	COG3464	L	-	-	-	ATGGCAAAATATGAAACATTGCTTCCCCGTTTTCTAAGATATGTAAAAGTAAATACTCGTTCAAACCCTAATTCAAGTACAGTTCCCACCGATCCTAAAGAAGTTGAATTCTTAAAAACTTTAGCAAAAGAATTAGAAGAAGTTGGCGTAGTGGACGTTCACACCCAACCATCTTCCGGTTACGTAGTTGGAACGTTGCCAGCTAACGACGATGGCAACACTCCCGTAATTGGATACATTTCACACGTTGATACAGCTGATTTCAACGCTGAAAATATCCAACCTCAAGTTCACAAAAACTACGACGGTGAATCTGACATTGACTTGAGCGGCGACGGTAAGTGGGTTTTGAAACCTTCCGTCTTTCCAAGTTTGAAGAAGTATGCCGGCCACGACTTA…	MAKYETLLPRFLRYVKVNTRSNPNSSTVPTDPKEVEFLKTLAKELEEVGVVDVHTQPSSG YVVGTLPANDDGNTPVIGYISHVDTADFNAENIQPQVHKNYDGESDIDLSGDGKWVLKPS VFPSLKKYAGHDLVTTDGLTLLGADDKSGVADIMTMLDYYKEHPEVKHGEIRIGFAPDEE TGTGADHFDAKDFNTKYAYTVDGGPLGELEYETFNAAQATIEIQGNEVHTAVAKGLMVNA LQVGIDYHNQLPEHDRPEETEDREGFYHLFKMTGTPDHAQLVYIIRDHDRQKFEERKQTM KDIAEKMNAEFGEDRVNVEVHDQYYNMREILEKDMTPVNIAKKAMENLDIKPDIYPVRGG TDGSKISFMGIPTPNLFAGGENMHSRYEYVSVQ…
gene1210	Single	-	1191267	1190497	771	ABC transporter ATPase component	-	GO:0003824;GO:0005488	COG0488	S	-	-	-	ATGTTGGGATGGATTTGGTCATTAATTATTGGTGGTATCATCGGTGCAATCGCCGGGGCACTTACAAGTCGTGATTTACCAGCAGGCTGGCTTGGTAACATTGTTGCTGGTTTAGTCGGAGCTTGGTTAGGACAAAGCTTACTAGGTTCATGGGGACCTTCCTTAGCTGGAATGGCATTGATTCCGTCAATCCTCGGTGCGGTAATTTTAGTAGTGATTGTCTCGATAATCTTCGGCATGCGCAAGAAGGGTTAG	MLGWIWSLIIGGIIGAIAGALTSRDLPAGWLGNIVAGLVGAWLGQSLLGSWGPSLAGMAL IPSILGAVILVVIVSIIFGMRKKG
gene1211	Single	-	1191501	1191325	177	ABC transporter ATPase component	lsa	GO:0003824;GO:0005488	COG0488	S	K19350	lincosamide and streptogramin A transport system ATP-binding/permease protein	ko02010	ATGGCATTAACTGAGCTAGTGAACGGAACTAAACTACCAAAACAAATAATTAGTACGGCGTTAGGGGTTAGTCGCCTTCATGATGCGCTTTGGTCAGGTTACCGTCATTTTTATGAAGAGATTAAGGACACTGACGATGACAATGAGGACCCTTATGCCCATTTTCCGATGACTAAGGAACCGCATGGCGATATTGCGGTAACTTTAAAAATGTACCGACAACCTAAACTAAAACGTAAAAATCTTTATATTACGGTTAATTTTGCGAAAAAAGTTAATGACAAGCCTTCGTTTGAGGAAGCCATTGAAGATGCTTTCCAAACAATGAAGTTTGATTATTTTGACGCTTTATTGCTTGATCAAGCGGTATTTGGTGACGATGACGAGTTAATGACCGAG…	MALTELVNGTKLPKQIISTALGVSRLHDALWSGYRHFYEEIKDTDDDNEDPYAHFPMTKE PHGDIAVTLKMYRQPKLKRKNLYITVNFAKKVNDKPSFEEAIEDAFQTMKFDYFDALLLD QAVFGDDDELMTELWHSLEELYEKGCVGALGVANFSIEQVEKLRKKATVAPMIFKTGYFP MSLNDDIYDYCQQNHLQIMADFPFLDYSFVDLPTMGKIASKYRVENDELMCQYAQQRHVM PIIKKFWVLHAHNPLEQNYKITINDLHRLERLDNASNEDWLPLKDYGIFKIFQSRAIDHD RMERSGEEHYSGFPPFVF
gene1215	Single	-	1195506	1195360	147	hypothetical protein	-	GO:0016020;GO:0044425	-	-	-	-	-	ATGACAATTGAAGTTCAACCGATTCGAGAACGAGATCTAGCCAACTTACGCAGGATAAGCATTGAAACTTTTGGCGCGACTTTTGGACCCTACAATGCGAAAGTAGATTTACAGCAGCATTATCAACGAGCGTATAATGTTGATCAACTTCGTCGGGAATTATTGAATCCAGAATCGCAATTCTTTTTTGCAAAAATTGATAATGAAATTGCCGGGTATTTGAAAATCAACGTTGGGGATGCACAATCTGAACCGATGGGAGCGCAAGTTTTGGAAGTGGAACGGATTTATGTACGACCGTCTTTTCAACGCCGAGGCATAGGCACTTGCTTAATTAAGCAAGCTGAACAACTTGCTTACGCAGCTCATAAAACTCAAATTTGGCTAGGAGTTTGGGAG…	MTIEVQPIRERDLANLRRISIETFGATFGPYNAKVDLQQHYQRAYNVDQLRRELLNPESQ FFFAKIDNEIAGYLKINVGDAQSEPMGAQVLEVERIYVRPSFQRRGIGTCLIKQAEQLAY AAHKTQIWLGVWENNKKAQHFYQMQGFKQVGDHRFQLGKSEQRDLILMKPVNNISEG
gene1237	Single	-	1217893	1217693	201	hypothetical protein	-	-	-	-	-	-	-	ATGAAATATTCCATGCGTTTTAGCGATACCATCCACGTGTTGGCTTACATTGCCATTCTGCACGATACGGCCCCGTTGACTAGTCAGGCCATCGCAGCCAGTGTGGAAACCAACCCGTCTAACATCCGCCGAATTATGGCGTCACTTAAAAAAGCTGGATTGATTAAAACCACCGTGGGTAAGCCCCAGCCAGCGCTAACCCGGGCACCAGAACAAATTTCTTTATTAGACATTTTCAACAGTCTTGATGAGGCCGACACGAATTTAATTCAAGTTGACCCCAAAACGAACCCGGACTGCGTGGTAGGCGGCAACATCCAAGATGCTTTAAACGCTCAATACGCTCATTTTCAAAAAGTTGTCCAAGACGAAATGGCTAAAACCACTTTGGCCGACGTC…	MKYSMRFSDTIHVLAYIAILHDTAPLTSQAIAASVETNPSNIRRIMASLKKAGLIKTTVG KPQPALTRAPEQISLLDIFNSLDEADTNLIQVDPKTNPDCVVGGNIQDALNAQYAHFQKV VQDEMAKTTLADVIQDIATNEVKKRPENQELVANYLKS
gene1239	Single	-	1219338	1218925	414	hypothetical protein	-	-	-	-	-	-	-	ATGCAAAAAATAAATGAAAACTACTTTGAAGGAGAACGATCACTGTTTAATGCTCGTGATTTAATAATTGAACAAGCTACTTTTGGCGAAGGAGAGTCGCCTTTAAAAGAGAGTCAAAATATTGAATTAATAGATACCGTATTTAAGTGGAAGTACCCCCTTTGGTATGCAAAGCACGTTAAAGGAGAAAGGATAATTCTAGAGACGATGGCTCGCTCGGGAATTTGGTATACGAACGATATTGAACTTAATGATTCAACTCTTCAAGCACCAAAGCTTTTTCGAGTGTGCAATCAAGTTAAGCTAAATAATATTCATTTTTCAGATGCGCAAGAAACCCTTTGGAAATGCAACCAGGTAATGCTGAAAAATGTGCAAGCTAATGGTGATTACTTCGGG…	MQKINENYFEGERSLFNARDLIIEQATFGEGESPLKESQNIELIDTVFKWKYPLWYAKHV KGERIILETMARSGIWYTNDIELNDSTLQAPKLFRVCNQVKLNNIHFSDAQETLWKCNQV MLKNVQANGDYFGMNSTNLYIDHLDLVGNYCFDGAKNVEVHNSRLVSKDAFWNCENVTIY DSIISGEYLAWNTKNLTLINCTIESEQGLCYVDDLKMINCRVLRTNLAFEYCRNIDAEIT TDVMSIKNPISGNIRVASVGEIIMDDPTIDPQNTVITQTTTRLPKGA
gene1241	ORTHOMCL1987	-	1223876	1222746	1131	hypothetical protein	-	-	COG0732	V	-	-	-	ATGATTGGTAACGATGCCCTCAATCTGGAACTTTTATATATTTTTGTGAAGGTAAGCGAGTTAAAAAGTATTAATCAAAGTAGCGCATATTTGTCGTTAACACAGCCCGCAATCAGTAAAAAAATTAAACAGCTTGAAGAATATTATGAACAAGAGTTGTTTATAAGAAGTTCTAAAGGGATGGCCCTAACCCCTATTGGACAGAGGGTTTATTTGGAAGCAAAACAGCTGATTTCTCAGGTAGAGGGATTGAGGAATGCGATTCGTCAAAAAGAAACTAAAGTTAATGAATTACGTCTGGGGACTCTAGATAGTATTTCGTCTTATTTGTATCCTAACTTTTTTGTCAAATCTTTAAATGCGTTTAAATCAACTACTATCACTAATAGGATTGATGAA…	MIGNDALNLELLYIFVKVSELKSINQSSAYLSLTQPAISKKIKQLEEYYEQELFIRSSKG MALTPIGQRVYLEAKQLISQVEGLRNAIRQKETKVNELRLGTLDSISSYLYPNFFVKSLN AFKSTTITNRIDELIKPFNRGSLDVIFMDSAFKDEINGIYSEKEVDEEPYFLVYSKDNPL INLDKESIDPCTLQKMDLLMYPKYCPIHQRLIRVYQDLQINPPKIVEIDYGESMIAMVAN SNYITVLPKSIAINKVTADISHLKMKEFEVTFTRKISLFSRDAHVTEMVNRMMK
gene1242	Single	-	1224871	1223903	969	integrase	-	GO:0005488;GO:0009987;GO:0008152	COG0582	L	-	-	-	ATGACCAGAAAATATGCGCTTGGACTATTACTATGTTTAATATCAGTACTTTCATGGGGTGGAATGTTTCCCATTATGGAACCTGCCTTAAAAGTTATGGATCCCTTTTACTTCACCCTTTTTCGCTACGGTAGTGTTGCAATTATTTTTGCATTGATCTTATTCATTACGGAAGGTGCGCACGCTTTTAAAACTGAAGGCCACGTTTTTAAATTATGGGTCTTCGGTACTGCAGCATTTGCAGGCTTCAGCTTTCTAGTTTTTTTAGGCCAACAGCTTGCGGGTGCTTCCGGTTCCATCATCGCCTCAGTAATGATGGCAATTCAGCCTTTACTAGGTGTTCTCGTTGCTTGGATTTACCGCGGTATAAAGCCTACGTTAGCATCCTTAGTCTCAATG…	MTRKYALGLLLCLISVLSWGGMFPIMEPALKVMDPFYFTLFRYGSVAIIFALILFITEGA HAFKTEGHVFKLWVFGTAAFAGFSFLVFLGQQLAGASGSIIASVMMAIQPLLGVLVAWIY RGIKPTLASLVSMIVAAIGVFMVVTKGNFSVLFSGQNTLLAVTLILLGALCWVIYTAGGA DFPEWSILRYSTLTALLGVCSVIITLTIATILGWLHFPSLNQIVEVHTALIYMVTFAGVI AVFTWNLGNRIITPINGILFMNLVPITSFIIKIVNGYQVSLFEVAGCIITITALVGNNLY NRYKAKQSDTTELTSTH
gene1243		-	1226080	1224917	1164	type I restriction modification protein	hsdS	-	COG0732	V	K01154	type I restriction enzyme, S subunit [EC:3.1.21.3]	-	ATGGCAAAATTAGTTTTGATTCGTCATGGTCAAAGTGAATGGAACTTATCAAACCAATTTACTGGTTGGGTTGACGTTGATCTTAGTGATGAAGGTGTTAAACAAGCAAAAAATGCTGGTAAGTTAATTAAGGAAGCTGGTCTTGAATTTGACCAAGCTTACACTTCAGTATTAACTCGTGCCATCAAGACTTTGCACTATGCTTTGGAAGAATCTGACCAACTTTGGATTCCAGAAACCAAGACATGGCGTTTGAACGAACGTCACTACGGTGCATTGCAAGGCCAAAACAAGGCTAAGGCTGCTGAAAAATGGGGCGACGAACAAGTTCATATTTGGCGCCGTTCATACGACGTACTTCCTCCATTGTTAGATGCTAGCGATGAAGGTTCAGCTGCT…	MAKLVLIRHGQSEWNLSNQFTGWVDVDLSDEGVKQAKNAGKLIKEAGLEFDQAYTSVLTR AIKTLHYALEESDQLWIPETKTWRLNERHYGALQGQNKAKAAEKWGDEQVHIWRRSYDVL PPLLDASDEGSAANDRRYANLDPRIIPGGENLKVTLERVIPFWEDEIAPKLLDNKNVIIA AHGNSLRALSKYIENISDEDIMNLEMATGEPVVYDFNDKLEVQSKTKLN
gene1275	Single	+	1259575	1259703	129	hypothetical protein	-	-	-	-	-	-	-	ATGAAAGAGTTTGATGAAGTTTCTTTAGAATACAAAAATACGGGGGTGCGCCGCTACATTACTGGATTTGATGGTTTGCGCGTGTTGGCACTTTTAGGAGTTATTTTCTACCATCTAATGCCTTATAAGGTTCCGGGAGGGTATCTTGGGGTGCCAATCTTTTTTGCGGTATCTGGGTACTTAATCACGGATATTTTTATTCAGGAATGGGATCGTACGGGGAAAATAAAATTAGGGGCTTTTTATTTACGCCGGCTGCGGAGGTTATATCCGACCCTAGTCGTTGTGTTGGTGGCGAGCACTGCTTATATGACCATCTTCGCGCATAATTTATTGTCGCATATCCGAAGCATAATCTTGACCAACCTGACCTTCGTATACAACTGGTGGCTGGTGGGT…	MKEFDEVSLEYKNTGVRRYITGFDGLRVLALLGVIFYHLMPYKVPGGYLGVPIFFAVSGY LITDIFIQEWDRTGKIKLGAFYLRRLRRLYPTLVVVLVASTAYMTIFAHNLLSHIRSIIL TNLTFVYNWWLVGHGQSYFDRYNGESPFTHLWYLSVLGQYYFIWPLLLIVLLKIYTHRRV QVAGILLSLSVISAMIMAILYHPDTVNRVYYGTDTRVAPFLIGAALAFIWPSTRLKKNLD LHKNAVANIIGLIIMVLMITSFFTMPGTSAWPYYGGIFIFSVLSVLMIAIIAHPAFIWNR ALTNPVFKWLGSRSYGIYMYQLPVMVFYEQKVTNIAAHPVLNTIAPLVIILVLSELSYRF VEIPLAQFDYRHLGRFLKEMFDIESGFKWRHVG…
gene1287	Single	+	1268367	1268513	147	hypothetical protein	-	-	-	-	-	-	-	ATGAAAATTGAATACAAAAATTCAGTTAAAGATATAAGCGAAGGTATTTATAAAGTAGGTAATGTAATTTCACGATTTGGATCACCTTTTTTAGTTGCCCGTAATGACGCAGGATTTTATTGTCTTGTAGATTTAAGTAATGGAAGAATTTTTACTCCAAATTGTGCCACTTTACAAATATTGGCTGAAGGTTATGGTTCTGTTGGAGATAAATTAGTCAAAGCTAAACTAATTGTTGATTACAAACTAGATGGAGATACAGAAGATGAAGAATGA	MKIEYKNSVKDISEGIYKVGNVISRFGSPFLVARNDAGFYCLVDLSNGRIFTPNCATLQI LAEGYGSVGDKLVKAKLIVDYKLDGDTEDEE
gene1298	ORTHOMCL1984	+	1283329	1283505	177	hypothetical protein	-	-	-	-	-	-	-	ATGCAAGTAGTTTTAGGGGTTGATTTAGGAACCAGTGCGGTTAAGGTTTCGGCAGTTGACCAAGCGGGCAAAATTGTCGCCCAACAAAGTAAGGAATATCCCTTAAGCCAGCCTGAGCCGGGATTTAGTGAACAAAATCCGGAAGACTGGGTAATGGGGACGACCGTGGCAATTAAACGGTTAATTGATGTAGACAAAATTAAGCCAACGGATATTAAGGGGATTAGTTATTCAGGACAGATGCACGGATTGGTCCTCCTAGATGATCATCATCAGGTTTTACGTCCGGCGATTTTATGGAACGATACGCGGACTACTCAACAATGCAAAGAAATTTTGAATGTAATGGGAAAAGACTTTATTGATATCACCCGTAACGTGCCGCTCGAAGGATTTACT…	MQVVLGVDLGTSAVKVSAVDQAGKIVAQQSKEYPLSQPEPGFSEQNPEDWVMGTTVAIKR LIDVDKIKPTDIKGISYSGQMHGLVLLDDHHQVLRPAILWNDTRTTQQCKEILNVMGKDF IDITRNVPLEGFTLPKLLWVKEHEPQIFEEVATFLLPKDYVRYRMTGKIAMEYSDAAGTV MLDEEKRKWSSQIAEAFQLPMEIFPPLIESIGFAGKISETYASFSELSTDTQVFGGAADN AAGAIGAGILNTNQVLSSIGTSGVVLKYEDNAKVDYQGALHFFNHAIPNKYYTMGVTLAA GYSLSWFKKRFSNDNSFTDFVNAAKKSTVGANGLLFTPYIVGERTPYPDGDIRGSFIGID GTHRKEDFTRAVLEGIVFSFRDIMRIFAEKGSN…
gene1300	Single	+	1283914	1284144	231	transposase	-	-	-	-	-	-	-	ATGGCTAAATCAATTAACCAAGATGCGATGCGTGATTTAAATCTTAAATTAATGCTTCAATTTCTTTTTAATCACCCGAAAACTTCACGCATTGAAATTGCAAATAATTTAAGGCTAAATAAATCGACCATTTCGTCCCTATACGCGACCCTGAACCGGATGGGTTATGTGCGAGAAATTGGACACGGCGATAGTTCTAGAAGCGGGGGACGACGCCCAATTCTAATTAAATTTAATCGTCACTATGGTTACACCGTGAGTTTCGAACTCGGACACCATCATTTACGGATGATGACCAACTGGTTGACCGGGGAGAAGATTTCTTTTTATTCCATCCCGGTAATCGATAAAGATATTTATGAAATTGTCGAAATCATGAAGGAGCGGATTCGTTCAATT…	MAKSINQDAMRDLNLKLMLQFLFNHPKTSRIEIANNLRLNKSTISSLYATLNRMGYVREI GHGDSSRSGGRRPILIKFNRHYGYTVSFELGHHHLRMMTNWLTGEKISFYSIPVIDKDIY EIVEIMKERIRSISIPTAEHQLMGISVAINGIVDHNQIIDSPFIDMQNVDLAQTLAEFHV PVFIENEANLAAIATRDYMTDHKFKNLIALDVHNGIGAGIIINDRLYHGQLGRAGEIGRS LFFPGFASSPTMKIEKLYSEDAIIKKFGQLKRTPYVDRQQFLEYYRADDQVAIKIMNEFT EAVVYLLFNVSQIFSPELVSLQSRIIGEIPQLMTKIIREYEELAGANSPTKLQLSQMIED APLYGGASLLTHHLLGLEHYHLQMKI
gene1302	Single	-	1286268	1285645	624	hypothetical protein	-	-	ENOG410XXFR	S	-	-	-	ATGAAAGTAAATATTGATGATTTTGACGAATACCAAGGCAAGTCGGTAAAAAAGATTACGCTAGCTAACGACCGTCAAGTCCAAATCTCACTATTATCGCAAGGCGCATCGTGGCACGAATTCTTAGTTCCTAGCTCAGCTACTTGCGGTAACGACAATTTAATCTTAAATTTTGCCCATACTGCTGACTATTATCAAAACCCATTTTACTTAGGGATGAGTATTGGTCGGACAGGCGGACGGATTAGTAAAGGGAGCTTTACGCAAGGTGAACAGCTAATTCAACTGCCGCAAAACGAGGGAGCAAACACTTTACATGGTGGACCTCGTGGTTTTCATAGTTATAACTGGAGCTTCTATACCCAGACCAAAACTGATTCCGCAAGCGTAACGTTTGAA…	MKVNIDDFDEYQGKSVKKITLANDRQVQISLLSQGASWHEFLVPSSATCGNDNLILNFAH TADYYQNPFYLGMSIGRTGGRISKGSFTQGEQLIQLPQNEGANTLHGGPRGFHSYNWSFY TQTKTDSASVTFENSIKAESDGYPGDLKVAITYTLNNLNQVIIQYHGQAFDQPVLFNPTN HVYFNLTGNADILDHELQLNSHERLSVDQQKLPTGEFKVTAGTPFDFSHFKPLASCINDL QATTEKGLDDVYVVDNKVLAPAAVLRAPAANRQVEIYSARNGLVVFTANSFTADMPLTNG AGHPYQGIALETQTLPDSVHHTNFGNIVLPAHQVVDYQTVYQYSEI
gene1303	Single	-	1286558	1286259	300	hypothetical protein	-	GO:0005488;GO:0009987;GO:0008152	-	-	-	-	-	ATGAAACAACTAGACTTAGAATTTTTGAACGCTGCGGGAAAGACGCAACACTTAAAGTTAAAGTATGCAAAACAAGACCTCGACGAGGGTACGGTACGTTTAGCAATGGAAAAGATGATTGACACTAAGCTTTTCCAAAAAGAAGGCCAATTGCTTTACGTGACCCCCAAAGCGGCCCAATACGTGGAAACCTTGCATGAACCAATTTTCGATGACAGCAAACTTTAG	MKQLDLEFLNAAGKTQHLKLKYAKQDLDEGTVRLAMEKMIDTKLFQKEGQLLYVTPKAAQ YVETLHEPIFDDSKL
gene1304	Single	-	1288358	1286787	1572	hypothetical protein	-	-	ENOG410ZN8Y	S	-	-	-	ATGCAAAAAACTTGGTTAAAGACGGGAATCAACTTCACAATGGAAGGAGCAGGACACGATAAGAAGGTGCGCCGTTCCTTTGCCAACGTGGATAAAGACGTCAGCGCTGTACAAGTGGAAGAATTAGCACGGGCGCTCGAAATGCTTTTGGAAGATGAAGTGACGGAAGCACAAGTCGTCACCACAGAGCAAGTAACTTTAAATTAA	MQKTWLKTGINFTMEGAGHDKKVRRSFANVDKDVSAVQVEELARALEMLLEDEVTEAQVV TTEQVTLN
gene1307	Single	-	1292254	1292009	246	hypothetical protein	-	GO:0016020;GO:0044425	-	-	-	-	-	ATGGAATTTAAATATAACGAAAAACGTCCCGTGTATAGTCAACTCGTGGACGTTTTGCGAAAAGAAATCAAAAATAATTATCAACCAAACGATAAGCTGTTGTCTGAGCGCGAAATCATGCGTAAGTATGCGGTTAGTCGCAATACGGTCCGGGAAGCGTTGTCTGAATTAGAAAACATCGGCTACATTTATCGACAGCGCGGCAAGGGAACCTTCGTAGCCAACATGATTGATTACACGCAGAAAATTGGCGACGAATATAGTTTTACCGAGCAAATGAAGTCGATGGGACGCAAGCCCGAGACTCGAATTTTGGAAATGTACCAGCGGGATGCGGACGAGTACTTTAGTCAAAAACTAAAGGTTCCGGTGGGGACTTGTTTGATTAAGCTGAAACGT…	MEFKYNEKRPVYSQLVDVLRKEIKNNYQPNDKLLSEREIMRKYAVSRNTVREALSELENI GYIYRQRGKGTFVANMIDYTQKIGDEYSFTEQMKSMGRKPETRILEMYQRDADEYFSQKL KVPVGTCLIKLKRLRLADGQPIMIDRTYLPQAKFPNLSRDDLELKQRSLYAIFLEDYGEK VKVADERLSVGIISDEDAKLLNVASNTAGFLARRTTYNHKNEIIEYTISSARGDQFVYNI KYRH
gene1312	Single	-	1298281	1296989	1293	hypothetical protein	-	GO:0016020;GO:0044425	ENOG410YK7B	S	-	-	-	ATGAGATTACTGTTGATGAGTCACGGAAATATGGCGATCGAAACGCTGAAAAGCGCAGAAATGATTTTAGGCCATATTGATAACATGAAGGCGATTGGTTTACAGCCTAACCAAGGTCCGGAAGATTTACAAAAAGCTGCCGAAGAGTTTATCAATGACAACCCTAATCAGGACAAGACCATGGTTGCGGTTGATTTGCTCGGCGGAACTCCATCAAACGTCGTGGTACGCTTGATGGCTAAGTACCCAGATTTAGAAGTGGTTAGCGGGTTAAATCTACCAATGGTGATTGGATTTGCAAACCAAGTAATGATGGGAATGGATGTTGACAAACAATCATTGATTAGTGAGGCACAGAACGGCGTTGTTGACGTAAATGCTAAATTGAATGGATAA	MRLLLMSHGNMAIETLKSAEMILGHIDNMKAIGLQPNQGPEDLQKAAEEFINDNPNQDKT MVAVDLLGGTPSNVVVRLMAKYPDLEVVSGLNLPMVIGFANQVMMGMDVDKQSLISEAQN GVVDVNAKLNG
gene1331	Single	-	1315680	1315510	171	hypothetical protein	-	-	-	-	-	-	-	ATGGAAATCGGATTAGTTGGTTTGGGAAAAATGGGCATTAATTTAGCCCAAAACATGTTGCGTCACCAGCATAAAGTGGTCGGATTTGATTTGAATAACGCGTTAGTTGAAAAAGCGGTCGGTTATGGAGCAACCGGAGCGGCTTCGTTAGCTGAAATGGTGCAAAAAATGACGGCTCCCCGGGTGGTTTGGGTAATGGTGCCGGCGGGCAAGCCGACCGATGTAGCAATTGCGCAGCTAGGCGACCTGCTAGAGGCGGGAGATTACTTAATCGACGGCGGAAACACCTTCTGGAAGGATAGTTTGCGGCATAACCGGCTAATTTCGGAAAAAGGAATCCATTATTTTGATGCCGGTTCGTCAGGCGGTTGGCGCGGAGCACTTAATGGCGGGAATTTC…	MEIGLVGLGKMGINLAQNMLRHQHKVVGFDLNNALVEKAVGYGATGAASLAEMVQKMTAP RVVWVMVPAGKPTDVAIAQLGDLLEAGDYLIDGGNTFWKDSLRHNRLISEKGIHYFDAGS SGGWRGALNGGNFMIGGDDAAAFETIRPLFEDISQEDGYLYTGKAGSGHYLKMVHNGIEY GMMAAIGEGFEVLEASQFDYDNEAVAKLWNHGSVVRSWLIELAQDAFSKDPHLAEIAGRM HSNGEGQWTVEEAMDRHVPTPVIYAAVAERYRSMQDDTFTGKVVAALRNEFGGHAVDKK
gene1355	Single	+	1338690	1338839	150	transcriptional regulator	-	GO:0003824;GO:0005488;GO:0009987;GO:0008152	COG1597	I	-	-	-	ATGAGCGAAGAGGGTTTGAAAGTTAGCGTGCTTTCCAGTGGAAGCACCGGAAACGTTACCTACATTGAGACACCCGAACATAAGGTGCTGGTAGATGCAGGATTGAGCGGCAAGAAAATTGCCGGGTTAATGGAAAGTGTCGGTCGGGATATTCATGAGGTGGACTCCTTATTTGTCACCCACGAACATTCTGATCACATTCAAAGTGTCGGAGTGTTAGCTCGAAAGTACGGGATCAACGTTTACGCAAACCGGGGTACTTGGGATGCCATTAAAAATAAGGTCGGTAAAATTCCTACCGAACAAAAGTACATTTTTGATCCCAATACGACTAAGTCTTTGGATGACTTGGATATTGAAAGTTTTGCGGTGTCACATGACGCTGCCGAACCGCAATTT…	MSEEGLKVSVLSSGSTGNVTYIETPEHKVLVDAGLSGKKIAGLMESVGRDIHEVDSLFVT HEHSDHIQSVGVLARKYGINVYANRGTWDAIKNKVGKIPTEQKYIFDPNTTKSLDDLDIE SFAVSHDAAEPQFYEFHHAGKSFVILTDTGYVSDRVAGTIRNADGYLFEVNHDTEMLRMG GYPWPLKQRIMGDHGHLSNEDGANALMDVIGNRTKKIYLGHLSLHNNMKELAHLTVSSMM QNHDLAVGHDFEILDTDHEKADPLALI
gene1625	Single	+	1603745	1603876	132	hypothetical protein	-	-	-	-	-	-	-	ATGTTTGAAGTAAAAAATTCTAATAAGTTAGATTCACAAGTTTATCGAGATAGTTTAATTATTAGAGAAGATGTTTTTGTTAAGGAACAAGGTGTTCCTATCGAAATAGAAATTGAAGGTGAAGAAGGTCCAAAGTATTACTGTGGATATGTAGATGGTAATTTTGTGACTTGTGCGAGAGTGAAAATAGAAGATGGTGGAGTTTGGCATATTCAAAGAGTAGCGACCTTAAAAGATAGTCGTGGAAAAGGATATAGTTCAAGTTTACTTCGTAGTATTGAGGAAGATGCGAGAAAAGCAAAGGTGCCATATTTAACATTAGGTGCTCAGGATACAGCGCAAGCTTTTTATAAAAAACTTGGATATGAGGTTGTAGGTGAAGGATTTCTAGATGCAGAA…	MFEVKNSNKLDSQVYRDSLIIREDVFVKEQGVPIEIEIEGEEGPKYYCGYVDGNFVTCAR VKIEDGGVWHIQRVATLKDSRGKGYSSSLLRSIEEDARKAKVPYLTLGAQDTAQAFYKKL GYEVVGEGFLDAEMPHHRMDKKLV
gene1666	Single	-	1648913	1648029	885	ATPase AAA	-	GO:0005488	COG0464	O	-	-	-	ATGTTAACAAAGGGAAAACGGCGTTTTAAGCTTAAAATGCCGGGAGCGTTTGTAATTTTATTCATTTTGACGATTGTGGCGGTAATCGCTACGTGGGTAGTTCCTTCAGGGAGTTACGCAAAATTGGCGTACAACCAAGCAAACTCGTCTCTACAGGTAAAACAGCCTAACGGACAGGTTGAAAAGGTACCAGCTACCCAAAAAGAATTGGATAAACTGGGTGTTAAGATTAACATTCAGAAGTTCACGTCGGGAAGCATTAACCAAGAAATTTCAATTCCCAACACTTACGAACGCTTGAAGCAGCATCCAGCAGGAGTTGATCAAATTACTTCGAGCATGGTTAACGGAACTATCGAAGCTGTCGACATTATGGTGTTTATCTTTGTGTTAGGCGGT…	MLTKGKRRFKLKMPGAFVILFILTIVAVIATWVVPSGSYAKLAYNQANSSLQVKQPNGQV EKVPATQKELDKLGVKINIQKFTSGSINQEISIPNTYERLKQHPAGVDQITSSMVNGTIE AVDIMVFIFVLGGLIGVVRASGAFESGLLALTKKTKGHEFLLIFLVATLMVLGGTLCGIE EEAVAFYPILVPVFIAMGYDSIVCVGAIFLASSIGTAFSTINPFSVVIASNAAGISFTEG LPWRAFGCVVAALFVIGYLYWYSKKVKQNPATSYSYEDRDEFNQKWSVINNDEQQAAFTL RKKIVLALFVAGFPLMVWGVMTQGWWFPKMAASFLAFAILIMILTATGKNGIGEKGVVDA FVNGASSLVGVSLIIGLARGINLILNQGMISDT…
gene1694	Single	-	1674829	1674692	138	carboxymuconolactone decarboxylase	pcaC	GO:0003824;GO:0016209;GO:0009987;GO:0008152;GO:0098754;GO:0050896;GO:0044699	COG0599	S	K01607	4-carboxymuconolactone decarboxylase [EC:4.1.1.44]	ko00362;ko01220	ATGAATGAAGAGCAAATTAATAACATTGTTAAAGAAATAATTACCAAACAGGGGGATCAATTAGGAAACCTATTTGATCGCCAAAAAATGCAAAGGGTGTTTGACGCGGCCGTAGCTAAAGCTAACGAATTAAATGTGGGAGTTACCATGTGCATCATGGACGCAGCAACGGTTGTTCAAATGCTTTACCACATGCCGAATGCTAATCTAGTTAGCTCAGAATTAGCTCCTAAGAAGGCTTGGTCAGCAATCGCAATGAAAGAATCTACTAAAGATATTAGTAAAGATATTCAACCTGGCGCACCGCTTTACCAAATGGAAACCATGTTGAATGGAAAATTAGTGTCCTTCCCGGGCGGAATTCCGTTAGAAATCGGCGGAAAAATTGTCGGAGCGATT…	MNEEQINNIVKEIITKQGDQLGNLFDRQKMQRVFDAAVAKANELNVGVTMCIMDAATVVQ MLYHMPNANLVSSELAPKKAWSAIAMKESTKDISKDIQPGAPLYQMETMLNGKLVSFPGG IPLEIGGKIVGAIGISGGLVEEDQAICEAAVEEFMKESK
gene1703	ORTHOMCL1526	+	1682968	1683285	318	hypothetical protein	-	-	ENOG4111PC4	S	-	-	-	ATGAAAGAGCAACCGTTAAAGTCGAACACTAATCAACGGAATTCGACACTTGAGTTTGAACGCCTAAATCCAAGCATTATCTTTGCGTACTATTTACTTTTAATCATGATTACCGTTTTATTTAATTCCCCCATCATTTTAATGATTGAATTTATCGCGGCTTTGGGATTGTTAATTCAAGTTTCTGATATGATGTTGGCACTTAAAACGCTTAAGGCAACGGGAATAATGGCACTTTTTATTATCATTATTAATCCGCTGACCAACCATAACGGCGCACACTTACTGACGTCTTTTCACGGATTGACGATTACTAAAGAAGCGTTATTGTACGGAATTTTAATGGCTTTGTCTTTAACTAACGTAATTTTACTGTTTGCTTCGTATAACAAGCTGATG…	MKEQPLKSNTNQRNSTLEFERLNPSIIFAYYLLLIMITVLFNSPIILMIEFIAALGLLIQ VSDMMLALKTLKATGIMALFIIIINPLTNHNGAHLLTSFHGLTITKEALLYGILMALSLT NVILLFASYNKLMTNNKFMFLFGKILPRLSLLTMIVMRFIPLFLKRFKNISQIQKMRGIN VDQGSVRQRTKALMQLMQVLLVDACYNAFQTADSMTARGFGSTKRSNYQRYRMTRRDITY AGILASGGIVLIGEAIRRIGVIQIYPSLQMNWGTWQEEGLLIGTVALICGLPMVVELKEE LWWKFYK
gene1704	ORTHOMCL1525	+	1683559	1683858	300	Lipoprotein	-	GO:0003824	ENOG4111P6Q	S	-	-	-	TTGGTGGAAATTTTACAAGTAAAAAATTTATTTTTTAAATACGCTCTCGCTAAGAGGGATAATTTGGAAAATATTAATTTAAACGTCAATCAAGGTGACTTTATGCTGATCATTGGTGATTCAGGAAGTGGAAAAACTACCTTACTAAAACAATTAAAAAAGGAGTTATGGCCAGTTGGCGAACGTCGGGGAGCAGTAAAGTTTAAACACCAGTCCCTGAGAACACTATCGCCAATTGAAAGTGCCCGGAGAATAGGGATGGTTTTTCAAAATCCGGATGATCAAATTGTGATGGATACGGTAATCCAAGAGCTCGCCTTTTCCCTTGAAAATGTTGGGGAAGATAGTGAAAACATCCAGCGTAAAATTGCTGAAATGGTTAGCTTTTTTGGCTTTCAA…	MVEILQVKNLFFKYALAKRDNLENINLNVNQGDFMLIIGDSGSGKTTLLKQLKKELWPVG ERRGAVKFKHQSLRTLSPIESARRIGMVFQNPDDQIVMDTVIQELAFSLENVGEDSENIQ RKIAEMVSFFGFQDILYASVNELSGGQKQLVNLAAVLILQPELLLLDEPTAQLDPIATKE FISLLQRVHDELGVTIMISEHQLDELLPLANRLCIMEEGKLTFTGNVEEGVQHAVQDQKM AEFIPEVPRLFLAENLIATSSKDTVPLTVVAGKRFIDCHGIKFQQRKRIIPSLSGDPALK IEHVDFKYGRNSPLILNDLGLTVQRGEWLSIVGRNGTGKSTLLKCLMGMEKARRGKITVF NRKLAKWESGQLYRMVGYLSQNPADHFSYDTVL…
gene1705	ORTHOMCL1524	+	1684181	1684486	306	hypothetical protein	-	-	ENOG410XUN0	S	-	-	-	ATGAATAAGCAAATGACGGGAATTACTTTCTTAATTGCCATTGTAATTTTCTTGGTTTTTTTAACCTTCGTAACTGCACTACAAGGCCAGCACTTTCTTTTATTTAGTTTTATTTGCTTAATCGCGAGCGTAATTCCCTTTTATTGGAAATTCGAAAGCAGTGCTCTAAAAGCTCGTGAGGTGGTCTTTTTAGCGGTACTAATTGCAATCGCTGCAGTTAGTCGGGTACCATTTGCAATCATTCCCAACGTACAACCGACTAGTTTTGTGATTATCACTGCAGGAGCAGTGCTAGGTCCAGAATCGGGATTTATTATTGGCTCGACAGTGGCGTTAACGTCGAATATGTTTCTTGGACAAGGGCCGTGGACCCCATGGCAAATGTTTGCGTGGGGGATG…	MNKQMTGITFLIAIVIFLVFLTFVTALQGQHFLLFSFICLIASVIPFYWKFESSALKARE VVFLAVLIAIAAVSRVPFAIIPNVQPTSFVIITAGAVLGPESGFIIGSTVALTSNMFLGQ GPWTPWQMFAWGMMGMTAGLLKNTPLVNHKYAMVLFGFVWGFVFGWIMDLWYLVAYINPL NFKAMLLTFLGTGYFDLLHALSNVFFLLIFYNSWKKTITRFKIKYGLLD
gene1706	ORTHOMCL1523	+	1685313	1685831	519	hypothetical protein	-	-	-	-	-	-	-	TTGAAACAAAAATACATCTTATCAATTGACGCTGGTACTTCGGTAGTTAAGACCGTGATTTTTAACCATGCTAGCTCTGAGGTGGTTAGCTTTTCTAGAGAGTTGTCCCAAGAAAGTCCCCATCAGGGCTGGTACGAACAATCTCCCGAAGATATTTGGGAAAAAGTTTATTCATCGATGGCTAACGCATTGATTGTTTCGGGAATTAGCCCTAAGCAAATCGCTGGAATTGGGATTACTAATCAACGAGAAACCACCATCATCTGGAATAAAAGGACTGGCAAACCCATCTACAATGCCATTATGTGGCGCTCACGCCAGACCAACGAAATCACCGACTCTTGGAACCTTTCCAACTATAAAGACCTAGTCAAAAACAGTACGGGACTAGTATTAGAC…	MKQKYILSIDAGTSVVKTVIFNHASSEVVSFSRELSQESPHQGWYEQSPEDIWEKVYSSM ANALIVSGISPKQIAGIGITNQRETTIIWNKRTGKPIYNAIMWRSRQTNEITDSWNLSNY KDLVKNSTGLVLDSYFSASKIRWILDHVPHAQQQAENGELLFGTVETWLLWKLTNGHAHV TDYTNASRTMFFNIRTLDWDQELLKALNIPIQLMPEVRSNSEIFGYTIGSAFFNCSVPIA GMIGDQQSSLVGQLAFHRGAISATYGTGAFITVNTGENMVHSENNLLTTVSFGLDKKIYY GLEGNIFVAGTAVTWLQDSLEMIKDPLHSAAVASQSTNDSLYVVTSFNGMGAPYWDEKVQ GAVFGMTDKTTKADFVRATLQSIAYRSKDVILA…
gene1708	ORTHOMCL1522	-	1686375	1685989	387	hypothetical protein	-	-	ENOG4111UA7	S	-	-	-	ATGAAATTTTGTTTGAACTGTGGCGAAGAATTACCTGAAAAGGCACATTTTTGCCCTAATTGCGGGGCTAAAATCGAAACAGCATCAAGTGAAAGCTCCCGGCTTTCTCGTGCAGAATTGCATAAAAATCGGCAAGAAACACCATTAGACGATTTGAAAGAAAGCGCGGATACCAAACCGGAAGAAGAACCAACGATTAGTCGCACTCGTAGAAAAAATGGTGCTTCTACGGACCTCAAGGAGGGTGCGTTAACTACGTTGCAATGGATCGGAGGCAATTGGTTAACGGCTCTGCTAGTTTTGTTAGTAATTGGAGCAATTTTTTACTGGCTAAGTAAAATGGTTGGGGTAGTTTTACTGGTGGTGGCGGTTGCTGCCGCATTTTTCTACGCTCAACGA…	MKFCLNCGEELPEKAHFCPNCGAKIETASSESSRLSRAELHKNRQETPLDDLKESADTKP EEEPTISRTRRKNGASTDLKEGALTTLQWIGGNWLTALLVLLVIGAIFYWLSKMVGVVLL VVAVAAAFFYAQRVGAGDRSADQAVKATLQKGGEAGRQVWQKLQTALLKKHGKKDFTTPT AEQNSDSTEAEATEATAEPKSMKEGASSGVNDPKPTTGTDVRKGKQRWTLKNKFIMGIAI ITGMAAYWAPFASAPTAGYNVKTSLMSILKTLGDDQLAHFLWVIPALLLFGALLQFHWLT KWASYLNLLWYGMMFFLIYQNEAQLVGLGNMFNGVRWGWGGYLIVACSIILLLMHSRTRT RK
gene1709	ORTHOMCL1521	+	1686944	1687243	300	hypothetical protein	-	-	ENOG410Y13W	S	-	-	-	ATGTCTACCGAAAATAAATTTTTAAGTTCACTTTCATATTTCAGCATCTTTTTTCTACCAATTATTTTTCCAATTATCGTGATGGTACTTACTAGTAATGTCCAGTATGCACCTGCTCATCGGCACGCAATTACGGCGTTTTGGCTTCACCTCATTCCCGTCATTTTGTTGCCGTTAGGTTTTGGGTTGGGAATTCTCGCTACTGCGCACAGCTTTACGGGAAATCATTTTCCAACCACCTCTTTGGTACTGTTCTTAATTGTGGGATTAATGGGAATTGTGGCTTTGGCCCTCTTCATTTACAACATCTATAAGGGTGTGAAGATTTGGGTGGAATAG	MSTENKFLSSLSYFSIFFLPIIFPIIVMVLTSNVQYAPAHRHAITAFWLHLIPVILLPLG FGLGILATAHSFTGNHFPTTSLVLFLIVGLMGIVALALFIYNIYKGVKIWVE
gene1728	ORTHOMCL1526	+	1689636	1689953	318	hypothetical protein	-	-	ENOG4111PC4	S	-	-	-	ATGATTGATAACCGCTACGCCACTTTTGCTTTATTGTCGAAAAATAAATCCTACACGAAAACCGCTAAGGAATTATTTATTACCCAGCCTGCAGTTTCCCAACAGGTTAAGAGTTTAGAAAACGAACTCCAGCTAAAATTGGTGGAATACCGGCACCCGCATTTGAGCGTCACCCCTGCCGGACAAGTTCTAGCGCGATTCATCGAAACTACCCAACATCAAGAAAACCAACTGGTACAACGGCTGCAACATCCTGCCAAAGCAACCACGCTTCGAGTGGGAGTAACTCATTCAGTAAGTATTTTTATGGCTCCGCAACTGTTGCGAAAGTGGCACGATCGCTACACCCATATTCAGTGTACGGTTGCTAATACCCGCACCATTTTGTCTCAGATTGAC…	MIDNRYATFALLSKNKSYTKTAKELFITQPAVSQQVKSLENELQLKLVEYRHPHLSVTPA GQVLARFIETTQHQENQLVQRLQHPAKATTLRVGVTHSVSIFMAPQLLRKWHDRYTHIQC TVANTRTILSQIDTGKLNIGILEGNFDKSLYSSQTITTEDFVAVTRASSPLAQRSSLTLT DLLDEPLLLRENGSGTRKVFEDWASAFNVKKDDFAQVIEFGSSGGIVNLLQSLGVSFMYR SLVNPQLADQSLVTLPIKGLDISRPIAMVYAKNSFFENEYRQLL
gene1729	ORTHOMCL1525	+	1690227	1690526	300	Lipoprotein	-	GO:0003824	ENOG4111P6Q	S	-	-	-	ATGGCAAAGTTGGTGAAAGAAAAAAGCTTTTGGACAGCTATTGGAGTAACGTTACTCTGCGCGTTAGCCGGTAGCTTGTTGGCCCAATTACCATATTTTAGTTTAATTGGCGCCTTAGTAATTTCATTAGTTTTAGGAATGTTAGTACAGTTTAGTCCACGGGTCGTGGAAAAATCCAAAAAGGGTACCGGATTTATTTCTAACAAATTTTTACGTTTAGGAATCATCCTTTTGGGATTTAAGTTGAACTTAATTGATTTGGCGCATGCGGGAGTAAAGACGATTTTGTTGGCGGTTTTAATAGTTGGTCTGACAATTTTAGTGGTTTACAACTTAGCACGAAAATTTAACGTGGAATCTAATTTAGCAATGCTCGTGGCAAGTGGGACCGGAATTTGT…	MAKLVKEKSFWTAIGVTLLCALAGSLLAQLPYFSLIGALVISLVLGMLVQFSPRVVEKSK KGTGFISNKFLRLGIILLGFKLNLIDLAHAGVKTILLAVLIVGLTILVVYNLARKFNVES NLAMLVASGTGICGAAAVMGISPQIQVPADQEEQKREDEVMAIAVVAILGTVFTFIEIGF KSWLHLTPTQFGVVAGGSLHEIAHAVATGGAGGPVSLDTAIITKLSRVLLLAPVALIIGF WHRRRNEVNVANQVKGKLPIPWFMGGFILASVVGTFLPLGAGVLAGLVKLAYIFLGMAMA ALGMSVNFRVILKRGKGPFAAATIGSVLLLIFVIMASKWFF
gene1730	ORTHOMCL1524	+	1690849	1691154	306	hypothetical protein	-	-	ENOG410XUN0	S	-	-	-	TTGGTTAAGCGGGAAAATGGCTTTTGGCACAAATTTGGTTTTATTAAGGTCCACGCAAAAAATGTTTTTCGAGAATTTTCCATTCTTGAAAAACATTTTTTATTTTCTTCACAGTCCTAA	MVKRENGFWHKFGFIKVHAKNVFREFSILEKHFLFSSQS
gene1731	ORTHOMCL1523	+	1691981	1692499	519	hypothetical protein	-	-	-	-	-	-	-	GTGAGCGAAATTTTATTACAAAGTATTCAAGGGGTACTGGTAATCATTATTATGGTTGCCGTGGGGTACTATTTAGCCTCTCGACACTGGTTTAACGAGGATTCTAAAAAGTTGCTTGCTAAGCTTGTTACCCAAGTGGCCCTGCCGCCTTACATGATCACTTCAATTACCAAAGATTTTACTAAAGCTGAACTTTTCAAGTTACTGCCCAACCTTTGGTACCCGGTTTTATCAATGTTCATTTTAATGGGGCTTGCTTGGTTAATTGTGCGCTTAATTCACGTTGACCCGCGCCATCAAGGCTTGTTTACTTCCATGTTTTTTAACTCCAACACCGTTTTTGTCGGGTTGCCCATTAACCTAGCAATCTTCGGAGAACGCAGCTTGCCGTACGTGTTG…	MSEILLQSIQGVLVIIIMVAVGYYLASRHWFNEDSKKLLAKLVTQVALPPYMITSITKDF TKAELFKLLPNLWYPVLSMFILMGLAWLIVRLIHVDPRHQGLFTSMFFNSNTVFVGLPIN LAIFGERSLPYVLVYYMANTTIFWTLGVYFIQRDQQRQTKISLKSTLQKIFSAPLLGFMI GIVLIILNIHLPSFLSSSFTYLGGLTIPLSMLFIGVSVYDAGLRNMRFQKDNLGVLLGRF VFAPSLMALLVMPSSMPLIMKQVFILQSCMPVMTNAPVVAKLYDADADFASIMVTESTLL SLIMVPMMMGIMV
gene1733	ORTHOMCL1522	-	1693043	1692657	387	hypothetical protein	-	-	ENOG4111UA7	S	-	-	-	ATGACGGAGATTCGATTAATTGCAAGTGACATTGACGGAACTTTTTTAAATGACCAACGGGAGTTTGACCGTTCACGTTTTCAGGCCCAACTAGACGAACTTAGTCGCCGACAAATTAAATTTGTGGTTGCTAGTGGAAATCAACTGGCTCACTGCCAAGAAGTTTTTGCAGGAATTGAAGGCGACTTGACTTTTGTTGCTGAAGACGGCGCCCTGACCGTTGAGCAAGGGAAAGTTTTGGATGAAAATCCCCTTAAACCGGCCTTACTGCGTGATGCGTTGGATTATTTAATGAGCACTCCGGGATTTGCCGAAGCAAAACTAATTTTGTCGACCCGTCAACAAGCGTTCACCAACATGGTGCCTAGTGACGCCGATTGGAAAGACAGTGCATATTTT…	MTEIRLIASDIDGTFLNDQREFDRSRFQAQLDELSRRQIKFVVASGNQLAHCQEVFAGIE GDLTFVAEDGALTVEQGKVLDENPLKPALLRDALDYLMSTPGFAEAKLILSTRQQAFTNM VPSDADWKDSAYFYQHLTPVAKLTAVNEPIYKIDIHWSGLTDVRPQAEQLQNALGDDLGC VMSGLGGMDVTMPHVTKAYGLTQLQNLWQISMDETMAFGDTQNDEAMLQHARLGYAMKNA EPEAKKATKLITKLDNNHSGVLDMIERLLAGEIK
gene1734	ORTHOMCL1521	+	1693612	1693911	300	hypothetical protein	-	-	ENOG410Y13W	S	-	-	-	ATGACGGAAACACAAACTCAAGCAGCAATTATTCAGCAGTTACTGGAATTGCAAGCAATTCAGGTAAAGCCTGACGCACCGTTTACGTACGCCAGTGGAATCAAGTCGCCAATCTATACCGACTTGCGAATGACAATTAGCAAACCCGCGTTACGTAAACAAATTGCCACAGGGCTCAGCGAACTAATTCGCCAATTTTATCCGACGGCAACGGTGATCGGCGGGGTGGCAACGGCTGGGATTCCGCACGCAGCGTGGGTTGCCGAGGAACTCGAATTACCATTGATCTACGTCCGTTCTAAACCCAAGGATCACGGAGCGGGTAAGCAGATTGAGGGGACTTTACAAGCCGCTGACCAGGTAGTGTTGATTGACGATTTGATTTCAACCGGTGGCAGC…	MTETQTQAAIIQQLLELQAIQVKPDAPFTYASGIKSPIYTDLRMTISKPALRKQIATGLS ELIRQFYPTATVIGGVATAGIPHAAWVAEELELPLIYVRSKPKDHGAGKQIEGTLQAADQ VVLIDDLISTGGSVLKAGKAVRQTSAQLLGVASIFSYQLPDARQNFAAEETQLHSLIDYH QLIDHLATQQQLTPAQLDSARTWHQDPWQWGATTTIK
gene1769	ORTHOMCL1526	+	1705553	1705870	318	hypothetical protein	-	-	ENOG4111PC4	S	-	-	-	ATGAAGTTTGCCATTCGCGCGCAAAATCTCGAATATAAGCTCACGGAAACTGAAGAAAATATTGTCGAGTATATTTTGGTACACCAAGCTGAGGTAGTTAACATGAAAATCGTTACCTTGGCGCAACGCTTTTTTACCGTGCCCAATACCATTACCAGATTTTGCCGTAAGTTAGGTTATGGCGGATTTACCGAATTAAAAGTGGAACTGCGCCACGAACTCCTCGAAAAGCAAACCGGCAATCAACAACTGGCCTTAATTGAGGAAAATTTCGGATTAGTTGATGAAAAGCGGGAAATAAAATTAGCTAAATTACTTCAAAAAGCACGGTTAGTTAACTTTTATGCGCAAGATCAAACCCATTTAATTGCTGAATTAGGGGTAGAATGTTTTCAAGTT…	MKFAIRAQNLEYKLTETEENIVEYILVHQAEVVNMKIVTLAQRFFTVPNTITRFCRKLGY GGFTELKVELRHELLEKQTGNQQLALIEENFGLVDEKREIKLAKLLQKARLVNFYAQDQT HLIAELGVECFQVLDSKFQLLGYEKEVLSRINNGAGDVFFFISISGETPAIVNLAKKAKE RGHQVVSLTNLSNNSLAAVADVAIYCLTEVTYIAGIEVTDKTPMFVILQSLFQRYLKLCK ITPKKTETL
gene1770	ORTHOMCL1525	+	1706144	1706443	300	Lipoprotein	-	GO:0003824	ENOG4111P6Q	S	-	-	-	ATGTCAAAGGGAAAGAAAAGAATCGCTTTAGGAGGATTTTTTCAAGAACTAGGAAAAACATTTATGCTACCAGTTGCTTTAATGGCATTTATGGGGTTGTTATTAGGGCTTGGAAGTTCTTTTTCTAGTCCAACCACTATTGATGCATTTCCATTTTTAGGAAATAGCATTCTCCAAGTGGTTTTTAAGTACATGTCGGCCATCGGCGGTTTTGCTTTTAATAACTTAGCGGTAATGTTTGCGATGGCGATTCCTCTGGGACTTGCCAAAAAGGAAAAGGGAGTTGCGGCATTTTCCGGGTTCGTTGGTTACATGGTAATGAATTTAGCAATTAATTTTTATTTAGGTTTAACTAACCAACTTGCTGACGCAGACGCAATGCAAAAGGCGGGGCAATCG…	MSKGKKRIALGGFFQELGKTFMLPVALMAFMGLLLGLGSSFSSPTTIDAFPFLGNSILQV VFKYMSAIGGFAFNNLAVMFAMAIPLGLAKKEKGVAAFSGFVGYMVMNLAINFYLGLTNQ LADADAMQKAGQSLVLGVQTIEMGVLGGIITGIIVYNLNKKYCTIQLPDSFAFFGGARFV PIITSLVMAVVGIILPIIWPVFAFLINGVGALIHGAGPFGPMLFFSGERLLLPFGLHHIL VATIRFTQAGGTMLIDGHQVSGALNIFYSELQNHLPISHSATQFLSQGKMPTFMFGLPGA ALAMYHTAKPENRAKIKGLLISGFIATFITGITEPIEFLFLFISPFLWLFHVFMTGFGAL VVSLLGVNIGNTDGGVLDFLIFGVMQGTQTKWY…
gene1771	ORTHOMCL1524	+	1706766	1707071	306	hypothetical protein	-	-	ENOG410XUN0	S	-	-	-	TTGATAAATTTTGATGAAGTGATTAATCGAAAAGGTACTTATTGCACGCAATGGGATTATGTGCAGGACCGATTTGGCAAGGCAGACTTATTGCCGTTTACCATTTCAGATACCGACTTTGCGGTGCCACCTAGCGTAAATGAGGCGATTCAAAAGAGGATTCAACACCCGATTTATGGTTACACCCGGTGGAACCACGCTGATTTTAAGCAAGCCACGCAGCATTGGTTTCAAAAGCGCTTTGGATTGCGGGTGAACGGCGAGTGGATTGTGTATAGTCCGTCGGTAATTTATTCGATTTCCCAACTATTACAAATAAAGTCAAAACCAGGTGAGGGAGTGGTAATGCAAACTCCCGCGTATGATGCTTTTTTTAAGACTATTCGTGCTAACCAACGA…	MINFDEVINRKGTYCTQWDYVQDRFGKADLLPFTISDTDFAVPPSVNEAIQKRIQHPIYG YTRWNHADFKQATQHWFQKRFGLRVNGEWIVYSPSVIYSISQLLQIKSKPGEGVVMQTPA YDAFFKTIRANQRKLVENPLRYQNGQYTIDFADLEEKLADPNNQIMLLCSPHNPTGRVWT TTELQKMVQLCEKYHVFIIADEIHMDVVRKNVRHQNILKYVEQNAALLTSGTKTFNFPGL IFSYLLIPDPKLRTQFNYALKNKDGLSSCSILGMEATMAAYKNGSAWVDELNEYVEANVE LVRTYLKQYLPQVKLVESEATYLLWLDVTDLPLSMETIQKYCVEVGKVAIMGGGIYGGNG KQFLRLNVGCPKTKVQDGLERLQQSITAALQ
gene1772	ORTHOMCL1523	+	1707898	1708416	519	hypothetical protein	-	-	-	-	-	-	-	ATGTCGAAGAAAAAGAAAAAAGGAAAACTTTCCAAAACCTTAGTAGAACAAATTTTAGATAAGCATAAAATTGAGTACCAACAATTCGTTTTTCCAACGTACCAAGATGGGGACGTTAAGCAACTCAACGTCGACCACATCGGAATCGACGACCACGTCATTTATAAAACCCTCGCTTTAACCGGCAGCCAAACCGGTCCGCTGGTTGGGGTAATCCCCGTGGACGAACACCTTAGCTATAAAAAATTAGCGAAGCTGTCCGGAAATAAAAAAGTCGGTATGATTCCGCTAAAGAACTTGGTGGCAACGACTGGGTACGAACACGGCGCCAACACCCCGATTGGCATTTACGAAACCAAGGGATTTCCAATTTACATTTCGGAAATCGCTAAAGAACAA…	MSKKKKKGKLSKTLVEQILDKHKIEYQQFVFPTYQDGDVKQLNVDHIGIDDHVIYKTLAL TGSQTGPLVGVIPVDEHLSYKKLAKLSGNKKVGMIPLKNLVATTGYEHGANTPIGIYETK GFPIYISEIAKEQGTIIVSSGKIGRSVQLKATDLADLVHGTFGDITE
gene1774	ORTHOMCL1522	-	1708960	1708574	387	hypothetical protein	-	-	ENOG4111UA7	S	-	-	-	ATGACAGACTATTCATCTAAAGCTTACTTTGACAAACTTGAAAAGTTTTGGCGCGCAGCTAACTACCTCTCAGTTGGTCAATTGTATTTAAAAGACAACCCATTATTGAAGCGTGACGTTAAGGCCTCCGACGTTAAGGTTCACCCAATCGGACACTGGGGAACGATTCCTGGTCAAAACTACATTTACGCTCACTTGAACCGGGTTATTAACAAGTACGGCGTTAACATGTTCTATATTGAAGGACCAGGTCATGGTGGACAAGTAATGGTTTCTACTTCATACCTTGACGGTTCTTACACCGAAGCTTACCCAGCAATTACCCAAGACGAAGAAGGAATGAAGAAACTCTTCAAACAATTCTCTTGGCCAGGTGGGGTTGCTTCTCATGCCGCTCCT…	MTDYSSKAYFDKLEKFWRAANYLSVGQLYLKDNPLLKRDVKASDVKVHPIGHWGTIPGQN YIYAHLNRVINKYGVNMFYIEGPGHGGQVMVSTSYLDGSYTEAYPAITQDEEGMKKLFKQ FSWPGGVASHAAPVTPGSIHEGGELGYSLSHGVGAILDNPDQIAAVVIGDGEAETGPLAT SWNHNRFINPITDGAVLPILDINGYKLSNPTLTSRMTDEELAEFFHSQHWDPYFVEGDDS EAMDPKMAEVMDKAIEKIQEIQKNARENHDESLPYWPVIVFRSPKGWTGPKTWDGKVIEG TFRAHQIPIPVDQNNMEHVDALVDWMKSYKPEELFDEDGHIDQDILDFVPKGDKRMAANP ITNGGVHPTDLNLPDFRQYAVDTSKRGLNMKQD…
gene1775	ORTHOMCL1521	+	1709529	1709828	300	hypothetical protein	-	-	ENOG410Y13W	S	-	-	-	TTGGAAGAACTTTTTTTCATTCGTCGAATATTAGCAATTAGCGAAGCTGGATTAGCTTATGCAAGCGATCGCTTTGATATCGAACGTTATCAAGATCTCCGTCAGCTTGCGATGCAACGTTTGAGTGAGCTTGGAAATGTGCAAGTAACCACCGTGGCAGAACTCTTTAAGGACGAGGCGGGATATCCAACTCCCAAAGTGGACGTGCGAGCCTTTATTCGCCAAAAAAATCAGGTATTGCTCGTGGAAAACTCCCACGGTGAATGGGCTCTCCCTGGCGGTTTTGCAGAAATTGGCTGGACCCTAAAAGAAAACGTCATTAAAGAAGTGCACGAAGAAACTGGGCTGACCGTAAACACGGCTACCCTTCGCGCTGTCTATGACACCTCCCTAAGAAAA…	MEELFFIRRILAISEAGLAYASDRFDIERYQDLRQLAMQRLSELGNVQVTTVAELFKDEA GYPTPKVDVRAFIRQKNQVLLVENSHGEWALPGGFAEIGWTLKENVIKEVHEETGLTVNT ATLRAVYDTSLRKDVPQTFQYYKFIFACTVESGEFVKNSETVAMQWFDKDQLPPLSMKRT TPEQIAQLFDSVDLHVD
gene1781	Single	+	1714844	1715062	219	XRE family transcriptional regulator	-	GO:0005488	ENOG4111HA7	K	-	-	-	ATGAAAATTGGATTTATCGGTACTGGAGTAATGGGTACGGGAATTATTAATAATTTGTTAAAGCACCATCATCAGGTATTTGTCTACAACCGGACTAAGGCCCACGCCCAAGAAGTAATTGACCACGGGGCAATTTGGGTTGACTCGCCCGCTCAGTTGACCACCCAAGCACCCATCATCATTACCATGGTTGGTTTCCCGCAAGACGTTAAGGAAATTTACTTTGGGGAAAACGGTATTTTTACAACGTTGAAAGCCGACCAGTTAGTTGTTGATATGACCACCAGTTCACCAACCCTCGCTGAAGAAATTGGTCACCGGGCTGAAGAAATCGGGGCGTTGGCACTCGATGCTCCCGTTTCTGGTGGTGACATTGGTGCTAAAAACGCTACCTTAACC…	MKIGFIGTGVMGTGIINNLLKHHHQVFVYNRTKAHAQEVIDHGAIWVDSPAQLTTQAPII ITMVGFPQDVKEIYFGENGIFTTLKADQLVVDMTTSSPTLAEEIGHRAEEIGALALDAPV SGGDIGAKNATLTVMAGGHQEAFKKMEPLFPEISQAANYFGDFGTGQHAKMANQIMIAGT MTGLTEMLVYAKAANLDLQKVLDTVSHGSADNWSLDNYVPRILKDDYTPGFFAKHFLKDL NITLTEAKRMHIDLPATRLATQLYDNLVNAQGLGDDGTQALIKLWWK
gene1811	Single	-	1748740	1748594	147	hypothetical protein	-	-	-	-	-	-	-	ATGGCTTTAGAATTGGATGGCGGAGCAGTAGTTTACCAAATGCGGGCAAAAGAGCCGTATTACTTATTGCTAAAAAGCGCTACGAGTGATTTTTGGGGATTCCCTAAAGGACATTTAGAAAATACGGAATCGGCTCTTGAAGCCGCCGAGCGGGAGATTAGGGAGGAGACCGGGATTATCGCCACGGTCGACGATCGTTTTTACGACGTTTTAAATTATCGAGTTGGCGAAAACGACAAGAAAGTGACCCTATTTACGGCAAAGGTTCCTGAAGATACGGTAGTTCGATTGCAGAAGGAAGAAATTAGCATGGCGGCGTGGCTTGATTACGCAGCTGCTAGAAAGCGGCTAACCTACCTAAACTTAAAGCAGGCGTTAGATAACGCGGACCAATATATT…	MALELDGGAVVYQMRAKEPYYLLLKSATSDFWGFPKGHLENTESALEAAEREIREETGII ATVDDRFYDVLNYRVGENDKKVTLFTAKVPEDTVVRLQKEEISMAAWLDYAAARKRLTYL NLKQALDNADQYIRKAEQ
gene1820	Single	-	1757536	1757417	120	hypothetical protein	-	-	-	-	-	-	-	ATGCACGCATTTATGGAAGCCTATTCCGCGGTAAATTTAGCGTTCTTATTAAAGGGACTGTGGATAACTATTGAAGTTTCGGTGATTTCGATTATTTTTAGCTACGTGCTCGGTGGAATACTGGGACTAATCCGTTACCTTAACGTACGCTACTTGTCAGCGTTGGTGGGTGTGGTGATTGACGTAATCCGAAACTTGCCCCTCTTGTTAATGTTCTTCTTCGTTTACTTTGGATTGCCTAACTTAGGAATTCGGTTGGGAATCTTGCCATCTTCAATTTTGGCGCTAACGGTATTTGAATCAGCCATGATTGCGGAAATTATTCGGGGCGGGATTGTTTCGATCGATAAAGGCCAAATGGAAGGCGCCCGGGCGAACGGGTTATCGTATTGGCAAGCA…	MHAFMEAYSAVNLAFLLKGLWITIEVSVISIIFSYVLGGILGLIRYLNVRYLSALVGVVI DVIRNLPLLLMFFFVYFGLPNLGIRLGILPSSILALTVFESAMIAEIIRGGIVSIDKGQM EGARANGLSYWQAMRYIILPQAQVRMIPALVSQFISLIKDTSLATIIMLPEMMYHAQIIY GQNTNYIIPMFVALAGMYFVVCYTLSIISRKLEKKLA
gene1844	Single	+	1785501	1785656	156	PTS sugar transporter subunit IIABC	ptsG	GO:0005215;GO:0003824;GO:0044464;GO:0005623;GO:0016020;GO:0044425;GO:0009987;GO:0008152;GO:0051179;GO:0044699	COG1263	G	K02778	PTS system, glucose-specific IIB component [EC:2.7.1.199]	ko00010;ko00520;ko02060;ko05111	ATGTCCCACATTTTTTATCACTTTTTATACCTTTATGAAACGGTTATAAAAAGTCATTTAAAGAATCTCATTGTAATCAAAAGAGTTTCAAAAGGATGCCAAATCCCTAAGGATAATCAAAAATAG	MSHIFYHFLYLYETVIKSHLKNLIVIKRVSKGCQIPKDNQK
gene1860	Single	+	1800847	1801023	177	ribonucleotide reductase assembly protein NrdI	nrdI	-	COG1780	F	K03647	protein involved in ribonucleotide reduction	-	ATGAAGGCGAAACGAATTGACCGGATTGCAACCGGGGTAATTTACGCAATGGTGGGATTGGTCGTTTTAATCCTAATTGGGTTGCTAGGTTTTATCTTAGCGACCGGATTACCACACGTATCGTGGCGATTTCTGACATCTTCGGCGGCCGCCTTTAGTGCAGGAGGCGGCATTGGGGATCAATTGTTTAACTCATTTTATTTATTGGTGCTAACCCTGATACTATCCTTACCGATTGCGTTAGGAGCAGCAATTTATTTAAACGAGTATGCGCCCCAAAATAAAATTACCGAAATTATGCGAATCATGATTGAAGTGTTGAGTTCGTTGCCTTCGGTAGTGGTCGGGTTGTTTGGCTTCTTACTTTTCGTGGTGCAGTTTCAACTAGGATTTTCCATT…	MKAKRIDRIATGVIYAMVGLVVLILIGLLGFILATGLPHVSWRFLTSSAAAFSAGGGIGD QLFNSFYLLVLTLILSLPIALGAAIYLNEYAPQNKITEIMRIMIEVLSSLPSVVVGLFGF LLFVVQFQLGFSILSGAIALTLFNLPLLTRSIENALAGVPDLQREAGLALGISRWHTITK VILPAALPGILTGVILSAGRVFGEAAALIFTAGQSAPSLNYADWNPLSSTSPLNIFRPAE TLAVHIWKINTEGIMPDASQVSAGASAVLIIVILIFNFSARRLGNWVYRRITASR
gene1923	Single	-	1868334	1868062	273	serine hydrolase	-	-	COG2367	V	-	-	-	ATGGAAGACTTTTTTATTGGCGGACTTTTTACGAAGACAATGGAGGGATTTTTAATGGAAAATACGTTGGTTAAATCACTTTATGCGCAAGCAACGCATGATGAAGATGTAGCAGTAGAAGTAACGGGTTGGCTAAAGACGCTCCGTTCTTCCAAAAAAATTAGCTTTTTGGAAATTAACGACGGTTCCTGCATTAAAAATGTGCAGGTAATCATGGAAAATGGGTTGGAGAACTACGAAGAAATTAAGAAAGCTCCCATTTACACTACCTTAAAAGTAGTCGGAACAGTAGTGGACACTCCGAAAGCTAAACAACCGTTTGAAATTCACGCAACTGAAATTGAAGTTTTAGGTAACTCAGACAGTGACTACCCGCTTCAAAAGAAACACCACACACCA…	MEDFFIGGLFTKTMEGFLMENTLVKSLYAQATHDEDVAVEVTGWLKTLRSSKKISFLEIN DGSCIKNVQVIMENGLENYEEIKKAPIYTTLKVVGTVVDTPKAKQPFEIHATEIEVLGNS DSDYPLQKKHHTPEFLREQAHLRPRTNTFYAVFRIRSLAAFAIHEFLQKNNFVYVNTPLI TSSDTEGAGEMFKVTTLDLNNVPKNEEGKVDSTKDFFKQPTNLTVSGQLNAEAFALAFRD VYTFGPAFRAEDSHTTRHAAEFWMVEPEMAFANLQDVINVSEDMLKYVINYLLENASDEI DFLNQNVDQELRARLEATRDADFAQITYTEAIDKLLAADQEFENKVEWGIDLQTEHERYL SEKVYQKPVFITDYPRDIKAFYMRENEDHKTVA…
gene1934	Single	+	1878880	1879227	348	ABC transporter ATP-binding protein	-	GO:0003824;GO:0005488;GO:0016020;GO:0051179	COG2274	V	-	-	-	ATGATCAATTCGCAAGCAATCGCAACCGACGCTTGGACTGAATTACGTCAAAAACAAGTAGTTAAAGCAGATGGGGAAAGGATGCAATTTTACCCCTATAAAATCGCGCTAGTGGTTGATCAATTAACCACGGACGAGGTTGAACGGCGAAAAATTACGCAAGCAATTTTAGAGCAGTTAACGCAAATGGCGTCGCCATTAACGGTAGAACAAATTCGGGCGGTTTTTAAAGCAATTCTTCATGATTATCAACGGGACGACTTGTGGAAAAAATATGCTGAATATCGGCAAGCCGATGAAGCCAAGTGGCAGACCGCAATTGATCCGCAAAATAAATTAAGCCAGTTATTTGATGGACAGGATACGGTAGTTCACGAAAATGCTAATAAAGATAGCAAC…	MINSQAIATDAWTELRQKQVVKADGERMQFYPYKIALVVDQLTTDEVERRKITQAILEQL TQMASPLTVEQIRAVFKAILHDYQRDDLWKKYAEYRQADEAKWQTAIDPQNKLSQLFDGQ DTVVHENANKDSNIFSTRRDLTAGMVGKSFGLTMMPQTVAKAHLRGDIHFHDLDYSPLTS MTNCCLIDFKSMLANGFKIGNAEVESPKSIQTATAQMSQIIANVASSQYGGCSSDRTDEM LAPYAKLNYEKHLKEAEKWVLPEQREAFAKEKTKKDIYDAMQALEYEVNTLFSSNGQTPF TTVGFGLGTSWIEREIQKAILKVRIKGLGKQHRTAIFPKLVFSIKRGINLNPEDPNYDIK QLAVECATKRMYPDVLMYDKIVELTGNFKAPMG…
gene1958	ORTHOMCL1526	+	1903687	1904004	318	hypothetical protein	-	-	ENOG4111PC4	S	-	-	-	TTGTATTACTTTGGTAGCAATGGTGACGCAGTTACCGGCTTGCGTCACTATGATAATAACAAGTTAGAATATTACGGCGCGGACCACGTTCAATATCGTAACCGGTATTATCAAGAAGGTAATAAAGTCTATTACTTCGGTGGTAATGGTGACGCAATGGTCACCATCCGTGGGGCAATTGAAAACGGCAAGTTTAATATTTATGATATGCGGACAAACAAGCTTATTAAGAGCCTCGACGCTGGTACTTGGGAGAACTTGGCCTATTCGATGGATGCCAACTCCATTAACAATGTTTATGGCTACCTTAGCTACAGTGGTTGGTACCGACCAATTGGAACAAGCCAAGATGGTAAGACATGGTACAAGACCGGGGCTGGTGACTGGCGGCCAATCTTG…	MYYFGSNGDAVTGLRHYDNNKLEYYGADHVQYRNRYYQEGNKVYYFGGNGDAMVTIRGAI ENGKFNIYDMRTNKLIKSLDAGTWENLAYSMDANSINNVYGYLSYSGWYRPIGTSQDGKT WYKTGAGDWRPILMYASPNKDVQAQFIKYFVGHGYTNEGYGLTPAKVADLSAGTDTKILN EDSQNLRYVIEQSIAKNKSTSKLANDVNAFMQTVPSLSVASELSLTNSSSYVPDFNGTTS NDQLIFVNNHSADQTKGNTSYADSNYRLMNRTLNNQQGNHSVSPELLVGNDIDNSNPVVQ AENINWEYFLLNYGKLMNYNPDGNFDGFRVDAADNVDADALDQLGQLMNDLYHTKGNQTN ANNHLVYNEGYHSDGQSLMDGKGNPALYMDASM…
gene1959	ORTHOMCL1525	+	1904278	1904577	300	Lipoprotein	-	GO:0003824	ENOG4111P6Q	S	-	-	-	ATGTGTAATGATACTACTAAGCTTTTGTTAGGTATAGATGATAATCATATAAAAATTAAAAATGGTGCTCGAAAATGTGATGGAGTTATTCGCTTGGAAGGAACTTTAGACTACAAGCCGATGGCTTGTCCCAAATGTGGCATTATGAATAATGGACAGATTATTAGGTATGGGTGGCGGTTGACCACCGTTCGCTTTGCTAAAGCTCTTGGAAATGATACCGTCTTGAAGTTAAAGCGCAGATACTTTCGCTGTAAAGAATGCCAAACTAATTTTCTGGCGCAAACCAATCTAGTTCCCAAGCACTGCACAATTTCTAATCCAACCCGTAAAGCTTGCCTAGAAAAACTTGCTGAACCAGTGTCCTTAAAACATATTGCTAATGAGCTTTCGACATCC…	MCNDTTKLLLGIDDNHIKIKNGARKCDGVIRLEGTLDYKPMACPKCGIMNNGQIIRYGWR LTTVRFAKALGNDTVLKLKRRYFRCKECQTNFLAQTNLVPKHCTISNPTRKACLEKLAEP VSLKHIANELSTSDSFVGRQLLRAERDFKPNFHWLPEVILMDEIKSTKTATDAMSFEFMD AKTHKLIDILSFRTIQRLEKHFKRYDLAARENVKIIVTDMNYTYPKLTRTIFPNAIVVVD KFHIVNALNRAFNKTRVRIMKKFALSSREFKALKRYWKLLLVPHEQLDFEQFHKWTYFPY WVTAKDIVDRLLNLDPALKQTYNVLNKLQAALKHKDWNNYNAAFWNTEGCSEEMLSTLKM LQTHHDEIHNTFITQHSNGPLEGLNNKIKAIKR…
gene1960	ORTHOMCL1524	+	1904900	1905205	306	hypothetical protein	-	-	ENOG410XUN0	S	-	-	-	ATGTGCCGAATCCTCGGTGTTTCCAGAGCTCAGTATTATCGTTATCGATCCCCCAAACCTTCAAAACGCCGGGCCGAAGATGCGGACTTGAAACAACGGATTCTGCGGATCTTTGCGGAATTTAAGCAGCGATACGGTGTTATGAAGATCCACCATGAATTGAATCTGGAACTTCAACCACTGCAGCTTCGGTGCAGTCCACGACGGATTTCCCGGCTCATGAAGGAACTGGATATCCACTCCGTTACCGTCAATAAGTGGAAAGCGGCTTCGGCTTCCAAAACCAAGGTTGAACAGCGTCCCAACTTGCTTAAGCAGGATTTCTCGACCACTGGTTTAAATCAAAAATGGACCGCTGATATGACCTATATTCAAACGAAACGTAATGGCTGGTGTTAC…	MCRILGVSRAQYYRYRSPKPSKRRAEDADLKQRILRIFAEFKQRYGVMKIHHELNLELQP LQLRCSPRRISRLMKELDIHSVTVNKWKAASASKTKVEQRPNLLKQDFSTTGLNQKWTAD MTYIQTKRNGWCYLSTIMDLHSRRIIGYSFSKQMDTDLVLKTLESAVKNRTITGDLIIHT DLGSQYTSDDYNQRLTELHIRHSYSRKGCPYDNAPMESFHASLKKECVYPVPVFEDYETA AAVLFEYVHAFYNRKRIHSSLGYQTPLQVEIATLTSQMAA
gene1961	ORTHOMCL1523	+	1906032	1906559	528	hypothetical protein	-	-	-	-	-	-	-	ATGAATGGACTTACCACAGAAATTATCGCTGCACTAGCCCAAAAGCAAGATTTGGACGAAGATTTTCGTCACCACCTAGAAATTGCGATTAACCAGCTGCTTCAAACCGAATTGGCAGAGTTTTTGGGTTACGAACGCTACTCATACGCTGGGATTAACACTGGTAATAACCGCAACGGCAGTTATGAGCGCTCGTTTGATACGAAGTACGGCCTACTTAACTTAACCATTCCTCGAGATCGCAATGGCCGGTTTGAAAATCATACCTTGCCAGCCTACGGTCGGCATAGTGATAATTTAGAAACAACGGTCATTCAGTTGTATGCCAAGGGAATTACCACTGCTGAAATTGCCGAACTCATTGAGAAAATGTACGGTGCTCACTACTCCAAAGCCACG…	MNGLTTEIIAALAQKQDLDEDFRHHLEIAINQLLQTELAEFLGYERYSYAGINTGNNRNG SYERSFDTKYGLLNLTIPRDRNGRFENHTLPAYGRHSDNLETTVIQLYAKGITTAEIAEL IEKMYGAHYSKATVSNMTKAVNEQVQAFQQRRLASQYAAIFLDATYLPLKRDTVQKEAVH IAIGIRPDGTKEVLNYQVAPTESTGIWTELLGTLIKQGVKDVLLFVADGLVGLDESLNRH FPKTKRQRFLVHVGRNLMNKVRVKGHKAVISDFKQVHRAANREAAELKLNEFANNWHQTY PKLIKDLLKMPNLLTFMDFPPAIRQSLYSANLIENFNKHLKRTTHHKEQFPTEDSLDRFL VSQFNVYNEKSQKRIHRGFQGLQEPLEASFI
gene1965	ORTHOMCL1522	-	1907326	1906940	387	hypothetical protein	-	-	ENOG4111UA7	S	-	-	-	ATGATTGCTCACGAATTTAAACTAGCTACTAAATCTATTTATAATTGGCTAAATCAGGGGAGAATTGGTTTCTCCTTGAATGATCTATCTGAACATGGCGTACGCCAACGGCGTAACGTTGACCAACGATCCAAATATAATCAATCTTTGGGGCGATCAATTGAACAGCGTCCCATGATGATTAATCAACGTAAGCGCATCGGCGATTTTGAACTAGATACAGTCGTTGGTCCTCGTGGGCATAGTAAGGCAGTTTTATTAACTTTAATCGATCGCAAATCACGGTTCCTTTGGGCATACCGGTTAAAAGATCGGACGACAGCGACTGTTAATGAAGCACTAACTAAGTTCCTAACCACTTTTAATGGTCCGGTGCACAGCTTTACTGTGGACCGTGGC…	MIAHEFKLATKSIYNWLNQGRIGFSLNDLSEHGVRQRRNVDQRSKYNQSLGRSIEQRPMM INQRKRIGDFELDTVVGPRGHSKAVLLTLIDRKSRFLWAYRLKDRTTATVNEALTKFLTT FNGPVHSFTVDRGTEFSGLVSLESQYGIKTYYCHAYTPAERGSNERFNRNLRYFYPKGTR FEHISAQDLTTTLLQINQRPLKILDWQTPYQVMLTNLSKNSD
gene1966	ORTHOMCL1521	+	1907895	1908194	300	hypothetical protein	-	-	ENOG410Y13W	S	-	-	-	ATGAATTTGAAAAAAATTAATATCTTATTGGCAGCGGACCGTAATTATGCTGACCCACTATGCATTACCATTAAAACTGCTTTAGAAACCTTAAATTCAGCAACCCGGGCCCATTTCATTGTTTTAACTAACAACCTTGGTGACCAAACCCGGGCACTGTTAGACAAATTGATGCATAATTTTCATACCATTGAGTATTTAAATCTTGACGACGAACGTTTTGATTTTTGCCCAACGAACCAACACATCAATAAAACCGCATATTTTCGAATCATCGCCCCTAAGCTACTAGCTTCACGGCAGATTGATCGACTAATTTACTTAGACGTTGACGTTTTGATTCGAAAGGACCTAACCGAACTTGCCGAAAGTAATTTAAATGGTAATACCGTGGGTGCG…	MNLKKINILLAADRNYADPLCITIKTALETLNSATRAHFIVLTNNLGDQTRALLDKLMHN FHTIEYLNLDDERFDFCPTNQHINKTAYFRIIAPKLLASRQIDRLIYLDVDVLIRKDLTE LAESNLNGNTVGAVIDTGQAFALHRLGVDPVVAASNLYFNSGIMVIDVARWNAHRITEKT LAFIRNHADRIIFHDQDALNAVLAGEVQFLHPKWNLQNSIIFRKHRPINQGYAELIDEAI KEPSIVHFTTHEKPWKDLTVHPYLDEYHEELGELEMHRGVINVISAANSAFIQPLATSYI SILENDPEHQYNFFLLPDHLTDRDMMLLGSIIARYDNATIKIVEVNEELLANAVESDRIV KTAYYRILAPALLPSINRAIYLDCDIIANTSLH…
gene1970	ORTHOMCL1526	+	1909204	1909521	318	hypothetical protein	-	-	ENOG4111PC4	S	-	-	-	TTGACAGAAGAAGATAATAACCCTATTCCATTTGAACCAGAAACAATACGACTAATTAGTCTATGGGCAAATAATAATCCTAAAATCATTAAAAAGACTATTGGGATTATTCCAAATGCTAGACGAGATGTCCAAGATTTACACAAAGATCATCATCTATTTTTTATCTTAGATCATGAACCAGAATTACAAACCAAGATCACACAAACCTTGCGTCGGTATTTTAATGCTTTGCGAAGCGACGATAAACAGACTAAAAATTACGAGAACTATTTATATATCACTATGAAAAATATGTTTGAAAATTACGGTAGTTCTAAACTACAACGTGAATACAAGTTTGAACACTCAACAAACCAGATAGCGAAGAATAATTTATCAATGGACTTAGGGACGGAG…	MTEEDNNPIPFEPETIRLISLWANNNPKIIKKTIGIIPNARRDVQDLHKDHHLFFILDHE PELQTKITQTLRRYFNALRSDDKQTKNYENYLYITMKNMFENYGSSKLQREYKFEHSTNQ IAKNNLSMDLGTEYLN
gene1971	ORTHOMCL1525	+	1909795	1910094	300	Lipoprotein	-	GO:0003824	ENOG4111P6Q	S	-	-	-	GTGGATGCCCTTGCTGCAATCCCACCAATTTACTTTGGATTACCTGAACACGCAATTGAAGCATATTGGACAAGCATGATGGAAGTAACTAATTTAGATTTCATTATATATAATATTCCGCAAACAACCGGTTATGCACTATCAGAAAACTTATTTAAAAGTATGATGGCAAAAGAACAAGTTATTGGGGTTAAGAATTCATCCATGCCAGTAATGGATATCAATATGTGGAAATTACGTGCTGGTAAAGATAATATTGTTTTCAATGGGCCAGATGAACAATTTGTAGGTGGACGCGTAATGGGGGCCGATGCAGGTATAGGTGGAACTTATGGTGTTTATCCAGAATTGTTAATGGAAGCGGATCGGTGCGTTCGTGAGGATGACCTTGAAAAAGCT…	MDALAAIPPIYFGLPEHAIEAYWTSMMEVTNLDFIIYNIPQTTGYALSENLFKSMMAKEQ VIGVKNSSMPVMDINMWKLRAGKDNIVFNGPDEQFVGGRVMGADAGIGGTYGVYPELLME ADRCVREDDLEKALQIQLKINDLISELTSFKGNLYDVMKLILAKRGVSVGRARNPLPHVE DDEMDHVEVVRQHIDDAIAEFTK
gene1972	ORTHOMCL1524	+	1910417	1910722	306	hypothetical protein	-	-	ENOG410XUN0	S	-	-	-	ATGACTGAAAGTTATCAATTTGATGTTTTGTACTTAGGCGCGGGGCATGGTGCCTTCGACGGGGCGGTTCCACTAGCTAATAGTGGTAAAAAAGTCGCCATTATCGAAGCGGACAAAATCGGGGGAACTTGTCCAAACCGTGGATGCAACGCGAAAATTACGCTGGACAACCCGGTTCAACTTTTACGCCACCAAGAACGCCTTGATGGCATTGTAAATGGTGACTTAAAGCTGGATTGGACTGCCAATGTAGAACATGAACACGAAGTCATCGACGGCTTGCCGGACATGATTACTGGTTTACTCGACTCTGTTGACATCGAAATTATTCACGGTCGTGGAAAATTTGTTGATGCTCACACCATCGAAGTGGATCAACAGCGCTACACCGCTGACAAA…	MTESYQFDVLYLGAGHGAFDGAVPLANSGKKVAIIEADKIGGTCPNRGCNAKITLDNPVQ LLRHQERLDGIVNGDLKLDWTANVEHEHEVIDGLPDMITGLLDSVDIEIIHGRGKFVDAH TIEVDQQRYTADKIVIATGLRPHHLDVMGSELTHDSTDFMNLKQLPENIVIIGAGYIGME FATIANAAGANVTVLLRHNRALRKFNQDYVKQVIADLEKRGVKFIYNAQVDRFEEDGSHF TVSYNDHETLTTDWILDATGRIPNIENIGLDEVGVSYNANGIEVNDHLQTNIDNIYASGD VLDKEQPKLTPTAIFESSYLTQLFTGKTTDAINYPPIPTIVFTSPQIAQVGMSVEEAQQN PDYTIKTNHLPDGWFRQVDKETIGDNTLIYDQD…
gene1973	ORTHOMCL1523	+	1911549	1912076	528	hypothetical protein	-	-	-	-	-	-	-	ATGACCGACTTTCTTCATCGTGGTAATCAAACTCAATCTTCTATCCAACTTGTTAACATGATTATGCTTATTTTTGGCATTTTGATGGGATTAGTCGCTGGGCCACTATCTAATAAATTTAAAATACTGAAATTACCAGTAGGTCTCTCAACTATCTTATTAGCAATTGCAGATCTCTCCCTGTTCTTCTTAAGAAATAATACTGGTATTATTCTTTACGCCTTAGCTGCCGGTTTAGGAATGGGCTTATGGAACGCACTTGATAATTTATTAAACTTAAAAGTTATCCCCGATCAAAATCGTGTTGCATTTTTCTTAGGTGTTTACAACTTAGGTAATACAATTACACAAGCTATCGCACCCGTTTTAGCCGCTGCCGTCATAAGTCTTTTTGGTTAT…	MTDFLHRGNQTQSSIQLVNMIMLIFGILMGLVAGPLSNKFKILKLPVGLSTILLAIADLS LFFLRNNTGIILYALAAGLGMGLWNALDNLLNLKVIPDQNRVAFFLGVYNLGNTITQAIA PVLAAAVISLFGYSGIFIVSFIFSLIGGISMLSIKSLKR
gene1977	ORTHOMCL1522	-	1912843	1912457	387	hypothetical protein	-	-	ENOG4111UA7	S	-	-	-	ATGTACGGTGCTCACTACTCCAAAGCCACGGTTTCCAACATGACTAAAGCCGTCAATGAACAGGTTCAAGCTTTCCAGCAACGTCGACTGGCTTCACAATATGCGGCCATCTTCTTAGATGCTACTTACTTGCCGTTAAAGCGGGATACCGTTCAAAAAGAAGCCGTTCATATTGCGATTGGCATTCGTCCATATGGTACGAAAGAAGTGCTGAACTACCAAGTGGCGCCAACGGAATCGACTGGAATCTGGACTGAACTGCTGGGAACCTTGATCAAGCAGGGCGTTAAAGATGTGCTGTTGTTTGTGGCCGATGGGTTAGTTGGTTTGGATGAAGGCTTGAATCGGCATTTCCCTAAAGCCAAACGACAACGTTGCCTGGTTCATGTTGGGCGGAAT…	MYGAHYSKATVSNMTKAVNEQVQAFQQRRLASQYAAIFLDATYLPLKRDTVQKEAVHIAI GIRPYGTKEVLNYQVAPTESTGIWTELLGTLIKQGVKDVLLFVADGLVGLDEGLNRHFPK AKRQRCLVHVGRNLMNKVRVKDRKAVISDFKQVHRAANREAAELKLNEFANNWHQTYPKL IKDLLKMPNLLTFMDFPPAIRQSLYSTNLIENFNKHLKRTTHHKEQFPTEDSLDRFLVSQ FNVYNEKSLKRIHRGFKGLQDTLEASFI
gene1978	ORTHOMCL1521	+	1913412	1913711	300	hypothetical protein	-	-	ENOG410Y13W	S	-	-	-	ATGATGAGCTATAAAAAATTGTGGAAGTTATTAATTGACCGAGACATGTCAAAGAAAGATTTAGCTGAACTGGCTGATCTTAGTCAATACACCATCAACAAATTAAATAATAGTGGTACAGTGACAACTGAGACACTAGCTAAAATTTGCATCGCACTGAATTGTGATGTTGGGGATATTTGTGAAGTGGTAGCTGCTTAA	MMSYKKLWKLLIDRDMSKKDLAELADLSQYTINKLNNSGTVTTETLAKICIALNCDVGDI CEVVAA
