# Supplementary material for: Complete Genome Sequencing and Comparative Genome Characterization of Lactobacillus johnsonii ZLJ010, a Potential Probiotic With Health-Promoting Properties
Source: Front Genet. 2019 Sep 10;10:812. doi: 10.3389/fgene.2019.00812 (PMC6746964; doi:10.3389/fgene.2019.00812)
Supplement: Supplementary file 4 [file Table_4.xlsx]

## Sheet: Sheet1
Table S4 Transporters of the ZLJ010 genome
Locus	Strand	Start	End	Gene length (bp)	Product	Gene name
ABC transporters
gene0439	-	465149	463224	1926	ABC transporter	-
gene0610	+	629884	630753	870	ABC transporter	-
gene1005	-	999804	998227	1578	ABC transporter	-
gene1038	+	1023372	1024955	1584	ABC transporter	-
gene1593	-	1572760	1571549	1212	ABC transporter	-
gene1849	-	1789875	1788013	1863	ABC transporter	-
gene1873	-	1812753	1811962	792	ABC transporter	-
gene1889	-	1837583	1835727	1857	ABC transporter	-
gene1890	-	1839327	1837597	1731	ABC transporter	-
gene1931	-	1876932	1875322	1611	ABC transporter	-
gene1997	-	1936247	1934679	1569	ABC transporter	-
gene1210	-	1191267	1190497	771	ABC transporter ATPase component	-
gene1211	-	1191501	1191325	177	ABC transporter ATPase component	lsa
gene0248	+	262328	263173	846	ABC transporter ATP-binding protein	cylA
gene0577	+	599249	600982	1734	ABC transporter ATP-binding protein	patA
gene0626	+	645141	646715	1575	ABC transporter ATP-binding protein	-
gene0847	+	824286	826052	1767	ABC transporter ATP-binding protein	-
gene0962	+	953955	954662	708	ABC transporter ATP-binding protein	-
gene1183	-	1165832	1165038	795	ABC transporter ATP-binding protein	-
gene1874	-	1813412	1812753	660	ABC transporter ATP-binding protein	-
gene1933	+	1877647	1878780	1134	ABC transporter ATP-binding protein	-
gene1934	+	1878880	1879227	348	ABC transporter ATP-binding protein	-
gene1935	+	1879234	1880814	1581	ABC transporter ATP-binding protein/permease	-
gene0027	+	27325	28932	1608	ABC transporter permease	-
gene0072	-	80776	80123	654	ABC transporter permease	-
gene0074	-	82672	82109	564	ABC transporter permease	ykoE
gene0450	+	472992	474755	1764	ABC transporter permease	-
gene0607	+	626938	628431	1494	ABC transporter permease	-
gene0733	+	722463	723338	876	ABC transporter permease	-
gene0734	+	723531	724079	549	ABC transporter permease	-
gene0963	+	954665	955480	816	ABC transporter permease	-
gene0964	+	955487	956323	837	ABC transporter permease	-
gene0988	+	981195	982673	1479	ABC transporter permease	-
gene0990	+	983885	984967	1083	ABC transporter permease	-
gene1001	+	993156	994739	1584	ABC transporter permease	-
gene1150	-	1135505	1133754	1752	ABC transporter permease	abcA
gene1555	+	1534085	1536661	2577	ABC transporter permease	-
gene1783	-	1717597	1716587	1011	ABC transporter permease	-
gene1883	-	1830355	1829129	1227	ABC transporter permease	-
gene1911	-	1858545	1857493	1053	ABC transporter permease	-
gene0744	-	733026	732718	309	ABC transporter solute-binding component	-
gene0745	-	733379	733053	327	ABC transporter solute-binding component	-
gene0899	+	884778	885632	855	ABC transporter substrate-binding protein	metQ
gene1557	-	1538369	1537275	1095	ABC transporter substrate-binding protein	-
gene0893	+	877977	879599	1623	ABC-F family ATPase	-
gene0871	+	852373	853884	1512	ABC-F type ribosomal protection protein	lsa
gene2013	+	1952166	1953911	1746	amino acid ABC transporter ATP-binding protein	-
gene0398	+	429934	430578	645	amino acid ABC transporter permease	-
gene0955	+	948127	948804	678	amino acid ABC transporter permease	-
gene0089	-	95617	94004	1614	amino acid ABC transporter substrate-binding protein	lysX2
gene0400	+	431209	432000	792	amino acid ABC transporter substrate-binding protein	-
gene0957	+	949561	950415	855	amino acid ABC transporter substrate-binding protein	-
gene1850	-	1790641	1789895	747	bacitracin ABC transporter ATP-binding protein	-
gene0999	+	991565	992893	1329	bacteriocin ABC transporter	-
gene0595	+	618089	620248	2160	bacteriocin cleavage/export ABC transporter	blpA
gene1162	+	1143754	1144839	1086	BMP family ABC transporter substrate-binding protein	bmpA
gene2016	+	1956098	1957168	1071	BMP family ABC transporter substrate-binding protein	bmpA
gene0276	+	288127	289026	900	branched-chain amino acid ABC transporter permease	-
gene1164	+	1146440	1147594	1155	branched-chain amino acid ABC transporter permease	-
gene0051	+	59439	60803	1365	branched-chain amino acid transporter II carrier protein	-
gene1194	-	1179062	1177683	1380	branched-chain amino acid transporter II carrier protein	-
gene0336	+	346273	347070	798	cobalt ABC transporter ATP-binding protein	ecfT
gene1994	+	1930786	1932663	1878	cobalt ABC transporter ATP-binding protein	-
gene1639	+	1618649	1619479	831	cobalt ABC transporter permease	ecfT
gene0349	+	356760	357644	885	cobalt transporter	czcD
gene1170	-	1153339	1150817	2523	excinuclease ABC subunit A	uvrA
gene1485	-	1463144	1460277	2868	excinuclease ABC subunit A	uvrA
gene1269	-	1254597	1252795	1803	excinuclease ABC subunit C	uvrC
gene0956	+	948808	949548	741	glutamine ABC transporter ATP-binding protein	-
gene0582	+	605637	606275	639	glutamine ABC transporter permease	-
gene0583	+	606289	606939	651	glutamine ABC transporter permease	-
gene0579	+	602798	603619	822	glutamine ABC transporter substrate-binding protein	-
gene0581	+	604816	605640	825	glutamine ABC transporter substrate-binding protein	-
gene1037	+	1021840	1023372	1533	glutathione/cysteine ABC transporter ATP-binding protein	-
gene0722	+	709848	711395	1548	glycine/betaine ABC transporter permease	-
gene1638	+	1616935	1618656	1722	heme ABC transporter ATP-binding protein	ecfA1
gene1533	-	1515401	1514535	867	hemolysin transporter protein	-
gene0568	+	589561	590322	762	iron export ABC transporter permease subunit FetB	-
gene1633	-	1612493	1611789	705	lantibiotic ABC transporter ATP-binding protein	nisF
gene0987	+	980484	981185	702	macrolide ABC transporter ATP-binding protein	-
gene0517	+	539606	540094	489	magnesium transporter MgtC	mgtC
gene0518	+	540078	540311	234	magnesium transporter MgtC	mgtC
gene0210	+	219409	220431	1023	magnesium-transporting ATPase	-
gene1840	+	1779018	1781702	2685	magnesium-transporting ATPase	-
gene1177	-	1160432	1158933	1500	manganese transporter	-
gene1447	+	1426679	1427569	891	metal ABC transporter substrate-binding protein	-
gene1875	-	1814350	1813451	900	metal ABC transporter substrate-binding protein	-
gene0900	+	885649	886698	1050	methionine ABC transporter ATP-binding protein	metN
gene0901	+	886691	887392	702	methionine ABC transporter permease	metI
gene0211	+	220529	222505	1977	methionine--tRNA ligase	-
gene0033	+	36759	38033	1275	MFS transporter	-
gene0056	-	65732	64377	1356	MFS transporter	-
gene0057	-	67114	65756	1359	MFS transporter	-
gene0143	+	148294	149511	1218	MFS transporter	-
gene0391	-	426012	424765	1248	MFS transporter	-
gene0433	+	456537	457790	1254	MFS transporter	-
gene0501	+	520315	521715	1401	MFS transporter	-
gene0533	+	550224	551702	1479	MFS transporter	-
gene0534	+	551809	553260	1452	MFS transporter	-
gene0562	-	586472	585261	1212	MFS transporter	mdtG
gene0572	+	593357	594850	1494	MFS transporter	-
gene0574	+	596530	597768	1239	MFS transporter	-
gene0740	-	730454	728982	1473	MFS transporter	-
gene0757	+	742142	743326	1185	MFS transporter	-
gene0886	+	870255	871598	1344	MFS transporter	malY
gene1003	-	997502	996321	1182	MFS transporter	-
gene1034	-	1018911	1018576	336	MFS transporter	-
gene1035	-	1019785	1019033	753	MFS transporter	-
gene1545	-	1526729	1525560	1170	MFS transporter	-
gene1891	-	1840296	1839463	834	MFS transporter	-
gene1929	+	1873359	1874573	1215	MFS transporter	mdtG
gene1984	+	1921051	1922250	1200	MFS transporter	-
gene2043	+	1984726	1986069	1344	MFS transporter	yaaU
gene1152	-	1138837	1136159	2679	Mg(2+) transport ATPase, P-type 2	-
gene0035	-	40230	39304	927	Mg2+ and Co2+ transporter	-
gene1000	+	992908	993153	246	multidrug ABC transporter ATPase/permease	-
gene0850	+	828075	829493	1419	multidrug ABC transporter ATP-binding protein	-
gene1141	-	1126370	1125501	870	multidrug ABC transporter ATP-binding protein	-
gene1594	-	1573499	1572753	747	multidrug ABC transporter ATP-binding protein	-
gene1867	-	1806180	1804633	1548	multidrug ABC transporter ATP-binding protein	-
gene0249	+	263173	264039	867	multidrug ABC transporter permease	cylB
gene0578	+	600975	602744	1770	multidrug ABC transporter permease	patB
gene1318	-	1304406	1303630	777	multidrug MFS transporter	-
gene1319	-	1305076	1304417	660	multidrug MFS transporter	-
gene0798	+	777699	778709	1011	peptide ABC transporter ATPase	-
gene0088	-	94014	93256	759	peptide ABC transporter ATP-binding protein	lysY
gene1910	-	1857478	1856798	681	peptide ABC transporter ATP-binding protein	-
gene0800	+	779687	780649	963	peptide ABC transporter permease	-
gene0801	+	780666	781580	915	peptide ABC transporter permease	-
gene0275	+	287138	288130	993	peptide ABC transporter substrate-binding protein	-
gene0742	-	731285	731157	129	peptide ABC transporter substrate-binding protein	-
gene0799	+	778716	779684	969	peptide ABC transporter substrate-binding protein	-
gene0802	+	781873	783627	1755	peptide ABC transporter substrate-binding protein	-
gene0803	+	783756	785516	1761	peptide ABC transporter substrate-binding protein	-
gene1828	-	1765790	1764036	1755	peptide ABC transporter substrate-binding protein	-
gene0613	+	632663	633463	801	phosphate ABC transporter ATP-binding protein	pstB
gene0614	+	633474	634229	756	phosphate ABC transporter ATP-binding protein	pstB
gene0611	+	630770	631762	993	phosphate ABC transporter permease subunit PstC	-
gene0612	+	631762	632652	891	phosphate ABC transporter, permease protein PstA	pstA
gene0615	+	634246	634929	684	phosphate transport system regulatory protein PhoU	phoU
gene0132	+	135371	136156	786	phosphonate ABC transporter ATP-binding protein	-
gene0277	+	289019	289783	765	phosphonate ABC transporter ATP-binding protein	-
gene2015	+	1955072	1956004	933	phosphonate ABC transporter substrate-binding protein	phnD
gene0133	+	136149	136952	804	phosphonate ABC transporter, permease protein PhnE	phnE
gene0134	+	136952	137764	813	phosphonate ABC transporter, permease protein PhnE	phnE
gene0399	+	430565	431212	648	polar amino acid ABC transporter ATP-binding protein	-
gene0954	+	947487	948146	660	polar amino acid ABC transporter permease	-
gene0164	+	178337	180163	1827	potassium transporter	-
gene0154	-	168604	166553	2052	potassium transporter Kup	kup
gene0155	-	170750	168753	1998	potassium transporter Kup	-
gene0721	+	708893	709855	963	proline/glycine betaine ABC transporter ATP-binding protein	-
gene0567	+	588930	589583	654	putrescine/spermidine ABC transporter ATP-binding protein	-
gene1884	-	1831244	1830348	897	sodium ABC transporter ATP-binding protein	-
gene1459	-	1438780	1437983	798	spermidine/purescine ABC transporter permease	-
gene1460	-	1438962	1438777	186	spermidine/putrescine ABC transporter permease	-
gene1458	-	1437986	1436913	1074	spermidine/putrescine ABC transporter substrate-binding protein	-
gene1163	+	1144910	1146436	1527	sugar ABC transporter	-
gene0224	+	236184	237287	1104	sugar ABC transporter ATP-binding protein	msmX
gene1798	-	1733236	1732151	1086	sugar ABC transporter ATP-binding protein	-
gene0226	+	238653	240008	1356	sugar ABC transporter permease	ganP
gene0227	+	240011	240868	858	sugar ABC transporter permease	ganQ
gene1165	+	1147594	1148550	957	sugar ABC transporter permease	-
gene1796	-	1731286	1730456	831	sugar ABC transporter permease	-
gene1797	-	1732151	1731288	864	sugar ABC transporter permease	-
gene0438	-	463113	461821	1293	sugar ABC transporter substrate-binding protein	-
gene1794	-	1729126	1727822	1305	sugar ABC transporter substrate-binding protein	-
gene0176	+	187888	188751	864	sugar transporter	-
gene2009	+	1945416	1947755	2340	sulfate ABC transporter ATP-binding protein	-
gene2012	+	1950352	1952169	1818	thiol reductant ABC exporter subunit CydD	cydD
gene0538	-	557231	555897	1335	uracil transporter	pyrP
Phosphotransferase system (PTS)
gene1528	-	1509844	1509578	267	phosphocarrier protein HPr	-
gene1827	-	1763756	1762836	921	phosphoenolpyruvate-dependent sugar phosphotransferase system EIIAB, probable mannose specific	manX
gene1843	+	1783590	1785473	1884	phosphoenolpyruvate-dependent sugar phosphotransferase system EIIABC, glucose specific	ptsG
gene1527	-	1509578	1507839	1740	phosphoenolpyruvate--protein phosphotransferase	ptsI
gene1816	-	1752974	1751088	1887	PTS alpha-glucoside transporter subunit IIBC	-
gene1908	-	1855810	1853948	1863	PTS beta-glucoside transporter subunit EIIBCA	-
gene2020	-	1962089	1960086	2004	PTS beta-glucoside transporter subunit EIIBCA	-
gene0198	-	210607	210281	327	PTS cellobiose transporter subunit IIA	celC
gene0201	-	212854	211424	1431	PTS cellobiose transporter subunit IIC	celB
gene0639	+	659625	660956	1332	PTS cellobiose transporter subunit IIC	-
gene1920	-	1865564	1864233	1332	PTS cellobiose transporter subunit IIC	-
gene0123	+	128757	129155	399	PTS fructose transporter subunit IIA	manX
gene0513	+	536997	537410	414	PTS fructose transporter subunit IIA	manX
gene0148	+	155606	157543	1938	PTS fructose transporter subunit IIABC	-
gene0121	+	127011	127928	918	PTS fructose transporter subunit IIC	manY
gene1879	-	1824852	1822867	1986	PTS fructose transporter subunit IIC	fruB
gene0122	+	127915	128733	819	PTS fructose transporter subunit IID	manZ
gene1825	-	1762021	1761218	804	PTS fructose transporter subunit IID	-
gene2005	+	1941526	1942980	1455	PTS galactitol transporter subunit IIC	gatC
gene1813	-	1749701	1749210	492	PTS glucose transporter subunit IIABC	crr
gene0543	+	560585	560941	357	PTS lactose transporter subunit IIA	lacF
gene0544	+	560996	562738	1743	PTS lactose transporter subunit IIB	lacE
gene1953	-	1901616	1900621	996	PTS mannose transporter subunit EIIAB	manX
gene0120	+	126511	126999	489	PTS mannose transporter subunit IIAB	manX
gene0515	+	537948	538781	834	PTS mannose transporter subunit IIC	manY
gene0516	+	538778	539605	828	PTS mannose transporter subunit IID	manZ
gene1951	-	1899766	1898837	930	PTS mannose transporter subunit IID	manZ
gene1952	-	1900599	1899796	804	PTS mannose/fructose/sorbose transporter subunit IIC	-
gene1515	-	1497423	1497043	381	PTS sorbitol transporter subunit IIA	srlB
gene0514	+	537435	537929	495	PTS sorbose transporter subunit IIB	manX
gene1826	-	1762820	1762011	810	PTS sorbose transporter subunit IIC	-
gene1937	-	1884100	1882157	1944	PTS sucrose transporter subunit IIABC	scrA
gene0126	+	131035	131682	648	PTS sugar transporter subunit IIA	-
gene0193	+	205340	206692	1353	PTS sugar transporter subunit IIA	celB
gene0271	+	279865	281826	1962	PTS sugar transporter subunit IIA	-
gene1844	+	1785501	1785656	156	PTS sugar transporter subunit IIABC	ptsG
gene0200	-	211277	210954	324	PTS sugar transporter subunit IIB	-
gene0442	+	466787	466912	126	PTS sugar transporter subunit IIC	celA
gene1982	-	1920531	1919212	1320	PTS sugar transporter subunit IIC	celB
gene0587	+	610167	612095	1929	PTS trehalose transporter subunit IIBC	bglF
