# Supplementary material for: Complete Genome Sequencing and Comparative Genome Characterization of Lactobacillus johnsonii ZLJ010, a Potential Probiotic With Health-Promoting Properties
Source: Front Genet. 2019 Sep 10;10:812. doi: 10.3389/fgene.2019.00812 (PMC6746964; doi:10.3389/fgene.2019.00812)
Supplement: Supplementary file 10 [file Table_10.xlsx]

## Sheet: Sheet1
Table S10 The gene clusters encoding the secondary metabolic enzymes that produce bacteriocin in the genome of L. johnsonii ZLJ010
Gene ID	Description	Pfam ID	Start	End	Length (bp)	NR Description	Gene Name	Swiss-Prot Description	GO ID	COG ID	COG Type	KO ID	Pfam ID	Nuc seq	AA seq
gene0589	hypothetical protein	-	613202	613324	123	hypothetical protein	-	-	GO:0016020;GO:0044425	-	-	-	-	ATGGCAATTGAACCACAAGATATACAACAAAAACACTTTTCCAACAAAATGCGCGGGTATAACCCCGACGAAGTTGACGAATTTTTAGATGACGTTGCTTTTGAACAACGGCGTTTGCATGATGAAATTGATTCGTTACGGCGCCAATTAGCCGAAGCCAAGAGCCGGGTGGAATATTTCGACGAGATGAAGGAATCCTTGAACAAGTCGATTATGGTAGCCCAAGATGCCGCGGATAAGGTTAAAATTAGTTCTAAAAGGGAAGCGGAATTCACTGCTAAAGAAGCTCAAAAAGAAGCTGAAGTAGTAGTCAAAAATGCGCACAAAAAAGCGGACGGCTATATCGGCGAAGCTGCTGGCAAAGCTCAAAAGGTTATTGTGGCAACTGACGACTTGAAG…	MAIEPQDIQQKHFSNKMRGYNPDEVDEFLDDVAFEQRRLHDEIDSLRRQLAEAKSRVEYF DEMKESLNKSIMVAQDAADKVKISSKREAEFTAKEAQKEAEVVVKNAHKKADGYIGEAAG KAQKVIVATDDLKKQARSFRQKLEVLLESQLQMIKGRDWDNLLSSDELLTIGEIKEAMRN SGALDIIQENSVHSEEVGKIDPDTPAVEPKEDELKTVVVFPEDQPNEQGKPTDQGFHVNP KK
gene0590	URK_LACJO RecName: Full=Uridine kinase; AltName: Full=Cytidine monophosphokinase; AltName: Full=Uridine monophosphokinase	PF00534.19;PF13692.5;PF13439.5	613986	613351	636	URK_LACJO RecName: Full=Uridine kinase; AltName: Full=Cytidine monophosphokinase; AltName: Full=Uridine monophosphokinase	-	RecName: Full=Uridine kinase; AltName: Full=Cytidine monophosphokinase; AltName: Full=Uridine monophosphokinase	GO:0003824;GO:0005488;GO:0044464;GO:0005623;GO:0009987;GO:0008152;GO:0044699	COG0572	F	-	PF00534.19;PF13692.5;PF13439.5	ATGGATAATCCGATTGGTCAGCACTTCCGTCCGGATGAACAACCGTTAATTGAAGAATTCAGTGCGCTGGTGCAAGAAGCCAAGGATCAAAACCGGTCCATTTTAACCAACTTTTTAAATCCAAGGCAGCAGCACATTTTAACGACGCTGGTTAACCGGGATGAAGAATTACAATTGTCCTTTTTTGGTGGATTTACCAATGCAGAAAACCAGCGGGGCTTGATTTGCCCCCAATACTTTGTTCCGGAAAAAGCGGATTTTCTAGTTAAAATATTTGAAATTGATTATCCGGTTAAATTCGCGGAATTGGAACATCGCCAGATTTTAGGCACGTTAGCGAATTCTGGGATTCAACGGGATACGTTTGGCGATATTGTTCATTACCAAGACCGTTGGCAA…	MDNPIGQHFRPDEQPLIEEFSALVQEAKDQNRSILTNFLNPRQQHILTTLVNRDEELQLS FFGGFTNAENQRGLICPQYFVPEKADFLVKIFEIDYPVKFAELEHRQILGTLANSGIQRD TFGDIVHYQDRWQVATNGELEKFFSNEITRIGRIKVRMQLAAPSEILTPVNDWERTQVTL ASLRLDSIVATAFSISRHRAKELIEHRQVQLNWMIDEKADTIIARNDVISVRKYGRIKLV EVLGKTKKDKLKTQLDLIKTR
gene0591	hypothetical protein	-	614315	614470	156	hypothetical protein	-	-	-	-	-	-	-	ATGATTGCGTTAATTTTTCAATTACTACACTGGGCAATCCAAATTTACATGATGCTGATTTTTATTTGGGTATTGATGTCCTGGCTTCCAGGTGCCTATCAATCTGCATTTGGCCAGTGGTTGACTAAAATTTGTCAGCCATACATGAGCTGGTTTAGATTTATCCCACCAATTTTGGGAATAGATTTTTCGCCAATTCTGGCTCTGTTAGTATTAGAATTGTGTTCTAACGGGCTTACCTACATTGAAGCACTGTTATTTGGTGTGACGGTTTATGGATAA	MIALIFQLLHWAIQIYMMLIFIWVLMSWLPGAYQSAFGQWLTKICQPYMSWFRFIPPILG IDFSPILALLVLELCSNGLTYIEALLFGVTVYG
gene0592	lactacin F two-component system histidine kinase	PF02485.20	614461	615780	1320	lactacin F two-component system histidine kinase	-	-	GO:0003824;GO:0016020;GO:0044425;GO:0009987;GO:0008152	COG2972	T	-	PF02485.20	ATGGAATTTTCAATGGATGATAACAAGAGTAAAGGCGCTAACATCAAAGTTATTGGTGTTGGTGGCGGTGGTGGTAACGCCGTAAACCGGATGATTTCTGAAGGAGTCAAAGGGGTACAATTCATCGTTGCTAACACCGACGTGCAAGCTTTACAAGCGTCAAATGCGGACGTAAAGATTCAACTAGGACCGAAATTAACTAAGGGACTAGGTGCTGGATCAACTCCTGAAGTTGGTGCTAAAGCTGCTGAAGAAAGTCAACAAACAATTGCTTCAGCTTTAGAAGGCGCAGATATGATTTTCGTTACTGCCGGAATGGGTGGCGGTACTGGTACCGGCGCTGCACCAATGGTAGCCAAAATTGCTAAAGAACAAGGTGCCCTTACCGTGGGGGTAGTT…	MEFSMDDNKSKGANIKVIGVGGGGGNAVNRMISEGVKGVQFIVANTDVQALQASNADVKI QLGPKLTKGLGAGSTPEVGAKAAEESQQTIASALEGADMIFVTAGMGGGTGTGAAPMVAK IAKEQGALTVGVVTRPFTFEGPKRARFAAEGVSNLKEHVDTLIIIANNRLLDLVDKKTPM MEAFNEADNVLRQGVQGISDLITSPGYVNLDFADVKTVMQNQGSALMGIGSANGENRTEE ATKKAISSPLLETSIDGAEQVLLNITGGPDLSLFEAQAASQIVTEAANDDVNIIFGTSID EELKDGVRVTVIATGIDKKAGRASLHRQPARTSFENPSSVNTANTNNISANTEMRGAGST DNLNNNGAANNQNTQAANDPFGDWQLRQSNNSS…
gene0593	transposase	PF03275.12;PF13450.5;PF00070.26;PF01593.23	615924	617081	1158	transposase	-	RecName: Full=Putative transposase in snaA-snaB intergenic region; AltName: Full=ORF401	-	COG0675	L	K07496	PF03275.12;PF13450.5;PF00070.26;PF01593.23	ATGGATAATTCAGGAATTTACGTTGGACTGGATATTGGAACCACCTCAATAAAAGTTATTGTTGCTGAATATGTCAAAGGACAAATGAACGTTATTGGTGTGGGAAGAGAGCCCTCAGATGGAGTCAATCGTGGTGTAATCGTTGATATTGATAAGGCAGCGATTGCCATTAAGCGGGCTATTGAAACTGCAGAGCGCAAAGCAAATATTCAAATCCAAGATGTAGTGGCTGGTATTCCAGCTAATTTATTAAGAATCGAACCCGTACGGGGAATGATCGCTATCTCAGATAGTTCACGCGAGATTAATAATCAAGATGTGATTGAAGTTTCTAATGCGGCGTCTGTACATAATTTACCTCCGGAACAAGAAGTGGTAGATGTGCTTCCGGATGAGTTT…	MDNSGIYVGLDIGTTSIKVIVAEYVKGQMNVIGVGREPSDGVNRGVIVDIDKAAIAIKRA IETAERKANIQIQDVVAGIPANLLRIEPVRGMIAISDSSREINNQDVIEVSNAASVHNLP PEQEVVDVLPDEFIVDGFDGIKDPRGMVGVRLEMNGGLITGPKTIIHNLKSAVRQAGLNL VDVVVNPLALGKTILNDGEQDFGTITLDLGAGQSTVAVIHDHHLKYTFVEQEGGQFVTKD ISVVLNTSLDNAEQIKQQYGYAVASEAGKETFPVNVVGQNEPVAVDEEYLSEIIEARLEQ ILTNIKKQLDKIGALDMPGGIVITGGGAALPGIEKLVERIFETNAKLYVPDQMGLRHPAF AQALAILNYEGRMSDVDILAKNAMVSSERTVSE…
gene0594	DNA-binding response regulator	PF00535.25;PF13641.5	617279	618076	798	DNA-binding response regulator	agrA	RecName: Full=Accessory gene regulator A	GO:0005488;GO:0044464;GO:0005623;GO:0009987;GO:0008152;GO:0050789;GO:0065007;GO:0023052;GO:0050896;GO:0044699	COG3279	T	K07707	PF00535.25;PF13641.5	ATGAAAAAGAAAAAAGATGATGAAAATCTAACCCCGTGGGCCCGTTATCAAAAAGAGCATAACCAACGTAACCGGACTAAAAAGAGTTTTAAATTAGGTGGCGCAAAGCGTGGTACTGCAAAAAAGCACCCGGGGAAAAAGCGTAATAAGTTAACCCAAAAGAAAGTCCGCCAGCCTTCACACATTGGTAAAGGAATTAAAATTGGTTTGCTTAGCTTGATTGGGATCTTGATTTTAGTTACGATTTACCTCTGCGCTCCCATTAGCCGGGTGCAAACCATTGCCGTGCAGGGGAATAAACGGGTGGAAAAAAGTGACATTTTAAAGAAAGTAACCGTAAGGAAAAATGACGTGATTCCGGCGACCTGGTTTAAGGAACGGGGCGACGAAGCGCGTCTA…	MKKKKDDENLTPWARYQKEHNQRNRTKKSFKLGGAKRGTAKKHPGKKRNKLTQKKVRQPS HIGKGIKIGLLSLIGILILVTIYLCAPISRVQTIAVQGNKRVEKSDILKKVTVRKNDVIP ATWFKERGDEARLIHKLPDLKDAQISVSLLGNVKIKVRENAVMGYVVRNKYYYAVRQDGT VSKKSATQPDGDYPVFRQFKDNQVLKRFLSQYAKLPNEVQNDVAEVDYTATKKERHQLHF FMNDGNEVYAVLNTFAKKMKYYPEISASMKKRGIVDLQVGAYSYPRGQSDESSTSSTSTD PTEEGSQSSGSEKNSLSVESSAKSKSADSSSSSSIDNVDYQTQQRRATQNSVQGFTATDE ENPDGN
gene0595	bacteriocin cleavage/export ABC transporter	PF14393.5	618089	620248	2160	bacteriocin cleavage/export ABC transporter	blpA	RecName: Full=Transport/processing ATP-binding protein ComA	GO:0005215;GO:0003824;GO:0005488;GO:0016020;GO:0044425;GO:0008152;GO:0051179	COG2274	V	K20344	PF14393.5	ATGAGACTGATGGTTTCAGGAGGCGGAACTGGCGGCCACATTTACCCAGCACTTGCCCTTATTAAACAAGTTCGGGAAGTCGAACCCGATTCAGCAGTACTGTATGTGGGAACGCATAAGGGACTGGAAAACAAAATTGTTCCCAATGCGGGGATCGATTTTAAAACGATTAAAATTCAAGGATTTAAACGTTCATTATCATTAGAAAACTTTAAAACAGTGGGACTGTTTTTGAGTAGCGTGGTTAAGGCGCGTAAAATGATTAAGGAGTTTAAACCAGACGTTGTACTAGGAACTGGAGGATACGTCAGTGGGGCGGTAGTATTTGCCGCCAGCATGATGGGGATTCCAACGGTGATCCACGAACAAAATAGCGTGGTGGGGGTCACCAATAAGTTC…	MRLMVSGGGTGGHIYPALALIKQVREVEPDSAVLYVGTHKGLENKIVPNAGIDFKTIKIQ GFKRSLSLENFKTVGLFLSSVVKARKMIKEFKPDVVLGTGGYVSGAVVFAASMMGIPTVI HEQNSVVGVTNKFLSKFVKKIAISFEAAADQFPKEKVVLTGNPRATEVVKITPQSLNQFG LKDDVPTVLIFGGSRGAEKINEVTMQSLNELVKRNYQTIFVTGRVHFDNLTKDVDLTPYK GKVAVLPYIADMPAMLPRMAVVVGRAGATSLAELTSLGIPSILIPSPYVTNDHQTKNARS LVDQHAAEMITENELTSKTLLTKLDDLMLDDQKRKQMAGNTKKLGQPQAAEKLYAVLKSV IKA
gene0596	hypothetical protein	-	620259	620651	393	hypothetical protein	blpB	RecName: Full=Uncharacterized protein in laf 5'region; AltName: Full=ORF1, partial [Lactobacillus acidophilus]	GO:0016020;GO:0044425	-	-	K20345	-	ATGAAAGCATTAGCAGAGATAAAGGATTTAGCAAATAAGAATATTCTCGTTTTGGGGATGGCAAAGAGCGGAGTTAGTGCCGCTCTTTTGTTGCGTAAACTGAATGCGCAGGTATTAGTAAATGACGCAAAAGCAGAACAACCGCAAGAACTGATTGAACAACTTAAAAAGGCTGACGTCCAAATGATTTTAGGCAGTCATCCAAAGGGAATCTTGGCTCAGCATCATATTGAATTAATCGTCAAGAATCCCGGAATCCCGTATACAAACCCAGTTTTGGTAGCTGCTAAGGAGCAAAACGTGCCAATCATTGCCGAACCTGAGTTGGCATACCGGGTGATGGACAGCGAATTAATTGGGGTGACCGGTAGTAACGGAAAAACAACCGTTACCACGATG…	MKALAEIKDLANKNILVLGMAKSGVSAALLLRKLNAQVLVNDAKAEQPQELIEQLKKADV QMILGSHPKGILAQHHIELIVKNPGIPYTNPVLVAAKEQNVPIIAEPELAYRVMDSELIG VTGSNGKTTVTTMIQLMLDQQDHHAAYVAGNIGVPATTVVQKATANDRVVMELSSFMLAG IDQLHPHIAVVNNIFSNHLDWHKTRENYVNDKMRITENQTKDDYFVINWDNPEWQQLAQR TAAQVVPFSRQGLVENGAYAKDGQLYFKNERIMAADEIGVPGDQNVENALAAIAVAKIEG VANKHIKQVLQTFSGVKHRIQYVKTLAGRQFYNDSKATDIEATQVALKAFQRPIILIAGG LDRGDDYTRLVADLKPHVKEVIVNGQTAAHMQE…
gene0597	hypothetical protein	-	620648	620851	204	hypothetical protein	blpB	RecName: Full=Uncharacterized protein in laf 5'region; AltName: Full=ORF1, partial [Lactobacillus acidophilus]	GO:0016020;GO:0044425	-	-	K20345	-	ATGAGTAACTTGTTAGCGGGCGGCTTAAGTGCCGTAATTACTTTAATAGGGATGCCCAGTTTTATCCATTATTTCCGGGCACGGAACGAAGGGCAAATGATCCGAGAAGAAGGCCCCAAGTGGCATCAAAAGAAATCTGGGACACCCACGATGGGAGGACTAGTTTTCATCGTGGCCATTATCGTGGCTGCGATCATCAGCGGGTTGGCGTTCCATTTATTGACCACCAACCTAGTGATGCTCCTCTTCGTTCTTTTAGAATTCGGTTTGATTGGTTGCTGGGATGACAGTATTAAATTATTAAAGCGGCAAAACGAAGGTTTTAAAGCTTGGCAAAAGCTGCTTGGTCAAATCATTGGCGGATTGATTTTTTACTGGGTCATTAAAGAAACTGGCGTA…	MSNLLAGGLSAVITLIGMPSFIHYFRARNEGQMIREEGPKWHQKKSGTPTMGGLVFIVAI IVAAIISGLAFHLLTTNLVMLLFVLLEFGLIGCWDDSIKLLKRQNEGFKAWQKLLGQIIG GLIFYWVIKETGVALQLSIPGIGIWHLGGWYALFVIFWLVGFSNAVNLSDGLDGLVAGLS TIAFATYAIIAAKLNQPAVMLFCWAVVGAMLAFLVFNHKPAKVFMGDMGSLALGGALGAV SIILNQELSLLLVGIVFVLETLSVILQVLSFKLTGRRIFKMSPIHHHFEMLGWSEWKVDT VFWIVGLIGALITLISIW
gene0598	enterocin A immunity protein	PF02397.15	620896	621180	285	enterocin A immunity protein	-	-	-	-	-	-	PF02397.15	ATGATGAACCCAAAAAAGCGAACGACTAATACTACGGAAACTCAGCACAATCGGATGATGTTTGGAAAATGGTTTTTATTGATTGTAGCAGGAGTATTTATAGTGATTGTTGGGCGCTTTTCTTATATTGCCATTAATAAGACGATTGAAAGCGTCAATCTCAGCAGTCAAGCCAAACGGCTATACACGGACAATAAAACTATTAAGGCTAAACGAGGTTCCATTTTAGATACCAATGGGAACCCGATTGCCGAGGATACTAGTACATATTCGATTTACGCGGTGGTAAGTAAAAAGCAGGTGGGCCCAAATCGCCAACCGCTGTACGTAACCGATAAAAAGAAAACGGCGCGTGTATTGAGCAAGTATCTACCAATTAGCTACAAAAAAGCGTTAAAA…	MMNPKKRTTNTTETQHNRMMFGKWFLLIVAGVFIVIVGRFSYIAINKTIESVNLSSQAKR LYTDNKTIKAKRGSILDTNGNPIAEDTSTYSIYAVVSKKQVGPNRQPLYVTDKKKTARVL SKYLPISYKKALKTLSPSNPKTFQVEFGSAGNNISVATKEKIEKYKLTGINFVSSEARLY PNGVFASNLIGFAQQSQEKGSDTTQLSGVMGLEKMLNKQLTGTDGEKSLQKDKFGYQLPG SQVERPARDGSTVYTTLDQRLQTIMESTVSKVQSQAHPESIGATIMNAKTGAILATTQRP TFNASTKKGLSKAWNNGLVQDTYEPGSTMKIFTTAAAIDSGNFDPDELYKSGTYEIDGQV VPDWKREGWGLISYEKGFALSSNVAMAHLEQKM…
gene0599	hypothetical protein	-	621310	621543	234	hypothetical protein	-	-	GO:0016020;GO:0044425	-	-	-	-	ATGGCTCAAAATAATGATTATGCTGGTCGTTCAAGAATGATTAACGAACCAACTTCAATTGCCGGAGTAGGGAAAAAAGAATTAAAAAAAGCCCGGGAGGTTGTAACTGCTCGACAACTGCCCTTGTCGAAGTTTGAAAAGTTTTTGATAACATTTTGCGGATTTATTTTGGTAGGGTTAATGCTTACCGTTGTTTCTGGTAAAATAAGTTTATCTAATGCACAGCATAAACTTGAAGCAACACAAGAGAAGACAACGGCCTTATCAAGCAAAAATACAACTATGAAACAAGAGGTTAATCAGTTATCCGACCAAAATCGGTTAAATAAAGTTGCTAAAAAGGCAGGCCTTTCTCTTAATTCAGAGAATATAAGGAATGTAAATAAATGA	MAQNNDYAGRSRMINEPTSIAGVGKKELKKAREVVTARQLPLSKFEKFLITFCGFILVGL MLTVVSGKISLSNAQHKLEATQEKTTALSSKNTTMKQEVNQLSDQNRLNKVAKKAGLSLN SENIRNVNK
gene0600	hypothetical protein	-	621587	621862	276	hypothetical protein	-	-	GO:0016020;GO:0044425	-	-	-	-	ATGACAGAATTTAAACATACCACCGTGCTATTGGAAGAAACCGTTGCTGGATTGAATATCCGCAAAGACGGCGTTTATGTGGATTGTACCCTTGGCGGGGGCGGCCATAGTCAGTTGATTTTATCTAAGCTGGGCTCTACAGGTCATTTGTATTCGTTTGACCAAGATCAAACAGCGATTGATTACAATCAAGATCATTTGGCACCATACATAGCAAATCAGCAAGTAACCTTTATTAAGGCTAATTTTAGAAACTTAAAAAATGAATTAAACCAACGAGGAATTGATCACGTTGATGGGATCCTATACGACTTAGGGGTTTCCTCACCGCAATTCGACGATGCCCAGCGAGGCTTCAGCTATCGCTATGACGCACCGCTTGATATGCGCATGGACCAG…	MTEFKHTTVLLEETVAGLNIRKDGVYVDCTLGGGGHSQLILSKLGSTGHLYSFDQDQTAI DYNQDHLAPYIANQQVTFIKANFRNLKNELNQRGIDHVDGILYDLGVSSPQFDDAQRGFS YRYDAPLDMRMDQSQELTAQTVVNEWSYNDLVRIFFRYGEEKYAKQVARRIEKVREQHPI VTTGELVEIIKEAIPAAARRTGGHPAKRVFQAIRIAVNDELGALEESLEQALDLLNDNGR ISVITFQSLEDRLVKRMFKEKTEIGDLPAGLPVIPADKKPHFKLVNRKPIVPSEDELKEN RRAHSAKLRIIEKLQEG
gene0601	hypothetical protein	-	621937	622080	144	hypothetical protein	-	-	GO:0016020;GO:0044425	-	-	-	-	ATGTTCATGGGTGAATTCGAACATTCATTGGACAACAAGGGACGTTTGATCATACCATCTAAATTCCGCGATCAACTAGGCGAGGATTTCGTAATTACGCGAGGGCTAGATGGATGCTTATTTGGCTATCCCTTGAGTGAATGGAAACTCGTCGAAGAAAAGCTTAGTCAACTACCATCTAATAAGAAAAATAATCGGGCGTTTGTTCGTTTTATGTTTGCTGATGCAGCCCAATGTAACTTTGATAAGCAGGGAAGAATTATCATTCCTAAAAAGTTGCGGGTCCACGCAGATTTGCAAAAAGAATGTGTTTTAGTAGGGGTTTCTAACCGAATTGAAATTTGGAATAAGGCCCGCTGGGAAGCTGCTATCGAAGAAACTGAAGCGAACTTTGACGAT…	MFMGEFEHSLDNKGRLIIPSKFRDQLGEDFVITRGLDGCLFGYPLSEWKLVEEKLSQLPS NKKNNRAFVRFMFADAAQCNFDKQGRIIIPKKLRVHADLQKECVLVGVSNRIEIWNKARW EAAIEETEANFDDIAENLIDFGL
gene0602	hypothetical protein	-	622067	622297	231	hypothetical protein	-	-	GO:0016020;GO:0044425	-	-	-	-	ATGTATAATAATAAAAAGAAGAAAAAGAGCGGTCTGCAAAAGGTCATCATGGTCTTTGTTTGGATTATGATTATCTTGACCCTGGGCAGCGTACTTTACGCCCCCCTTGCCCAACTCCTGGGTGCTTAA	MYNNKKKKKSGLQKVIMVFVWIMIILTLGSVLYAPLAQLLGA
gene0603	bacteriocin immunity protein	PF13520.5	622421	622735	315	bacteriocin immunity protein	-	RecName: Full=Pediocin PA-1 immunity protein; AltName: Full=Pediocin ACH immunity protein	-	-	-	-	PF13520.5	ATGATGATCAATTTTTTGGTTAAGCGGAACCAACTGCTTTTGGCACCCGTTTTGGCTCTATTGAAGTCAAAATGCCAAAATAAAAAACGGTTCATGAGGAAGTTTCACCTCATGAACCGTTTTTTTGTTTAG	MMINFLVKRNQLLLAPVLALLKSKCQNKKRFMRKFHLMNRFFV
gene0604	hypothetical protein	-	622738	623022	285	hypothetical protein	-	-	GO:0016020;GO:0044425	-	-	-	-	ATGGCAAAAGCAAAGAAAAGGCGTAAAACAACGCGCAAACGAAAGAAGCAACAAAGCCTCCCTACCCAAAATTTATTGGGGCTGGCGTACGTACTGGTTGCCCTTTTAGGTTATTTTGGCCGGGGATTCTTAGGAATGCTGGTTGCCAATATGTTTCGGATTTTTGTGGGGAGCCTAAGCCCGCTGGGGTTTGTATTGCTATTTTTTTACGGGCTCTACCTGCTATTTATGGGACGGGAACTACGGTTTAAAGGCGCTAGCGACCGGGTAATCGGGCTTAGCTTAACCATGATTGGTTATTTGCTTTGGGTCGAGTACCGGTTTGCAAGCGGACTAAATTTGGAAAGTGGGTTTGTTGCCCGGACCGTTGAGGGAATCGAACGATCCTTTTTAGAACAA…	MAKAKKRRKTTRKRKKQQSLPTQNLLGLAYVLVALLGYFGRGFLGMLVANMFRIFVGSLS PLGFVLLFFYGLYLLFMGRELRFKGASDRVIGLSLTMIGYLLWVEYRFASGLNLESGFVA RTVEGIERSFLEQITTNDIGGGLLGAVFYSGTHFLLSEIGSAILAIVLMTVGLVILFGIP FDEVLSKTGLAILWITQRLIEGIRALTRGVLDWWEQLDFTISKPDVKRTPMERKPPEDGA TKQPVKSERTRVEPTTEEPVVDGTRGIEHPAEPKIEISTNNQRNPRKPKNQEKQPTANPE VGFESENKLNPNYRLPSSTLLTEIPQADQSSEYDSIKKNTQILQDTLNSFGVDASVESVK MGPSVTEYEIHPAIGVKVSKIVGLADDLALALA…
gene0605	haloacid dehalogenase	PF00344.19	623086	625917	2832	haloacid dehalogenase	-	RecName: Full=Sodium/potassium-transporting ATPase subunit alpha-4; Short=Na(+)/K(+) ATPase alpha-4 subunit; AltName: Full=Sodium pump subunit alpha-4	GO:0005215;GO:0003824;GO:0005488;GO:0016020;GO:0044425;GO:0051179	COG0474	P	-	PF00344.19	ATGACAAATCATATTGTATTATTTGAGCCGTTAATGCCGGCTAATACAGGAAATATTGCCCGAACTTGTGCGGGAACTAACGCGGTATTACATTTAATTAAGCCACTGGGTTTTGAAATCAGTGATAAGACTTTAAAACGGGCCGGCTTAGATTATTGGGACAGCGTTAAGGTGGTTTACCACGATAACTTACCTGATTTTTTAGCGACCGTTAAGGATCGAAAACGACTTTTTGTGGTTTCTAAATTTGCTTCAAAAGCTTATACTCAAGCTGATTATACTGGAGCTGAAGACGACGTGGATAACTACTTTCTTTTCGGGAAGGAAACGACTGGACTACCGGAAGCCTTTATGCGCCAATATGCGGATTGTGCAATCCGTATTCCGCAAAATGACCAA…	MTNHIVLFEPLMPANTGNIARTCAGTNAVLHLIKPLGFEISDKTLKRAGLDYWDSVKVVY HDNLPDFLATVKDRKRLFVVSKFASKAYTQADYTGAEDDVDNYFLFGKETTGLPEAFMRQ YADCAIRIPQNDQHIRALNLSNSVAIVIYEVLRQQEFPNLEISHEYENDKLK
